# Supplementary material for: Dysregulation of the PRUNE2/PCA3 genetic axis in human prostate cancer: from experimental discovery to validation in two independent patient cohorts
Source: eLife journal article supplement (doi:10.7554/elife.81929), 2023-01-16
Supplement: supp [file elife-81929-supp-v1.zip]

## Discovery Cohort Selection Criteria

- Gleason Grade = 7
- Organ-confined cancer

$n=107$

Normal “nonmalignant” prostate tissue available?

$n=24$

## Data available:

- Age
- Race/Ethnicity
- Post-prostatectomy Gleason Grade
- Pathological Stage
- Biochemical Recurrence Status
