# Supplementary material for: Dysregulation of the PRUNE2/PCA3 genetic axis in human prostate cancer: from experimental discovery to validation in two independent patient cohorts
Source: eLife journal article supplement (doi:10.7554/elife.81929), 2023-01-16
Supplement: supp [file elife-81929-supp-v1.zip]

Archive with 8 entries (8 files):
- elife_poa_e81929_Source_code_1.zip
- elife_poa_e81929_Table_1_source_data_1.csv
- elife_poa_e81929_Figure_1_source_data_1.csv
- elife_poa_e81929_Figure_1_source_data_2.csv
- elife_poa_e81929_Figure_1_source_data_3.txt
- elife_poa_e81929_Figure_1_figure_supplement_1.ai
- elife_poa_e81929_Figure_3_figure_supplement_1.ai
- elife_poa_e81929_Figure_4_figure_supplement_1.pdf
