# Supplementary material for: Dysregulation of the PRUNE2/PCA3 genetic axis in human prostate cancer: from experimental discovery to validation in two independent patient cohorts
Source: eLife journal article supplement (doi:10.7554/elife.81929), 2023-01-16
Supplement: supp [file elife-81929-supp-v1.zip › elife_poa_e81929_Figure_1_source_data_1.csv]

Sample.ID	PR1C1	PR1C1.Cq	PR1C2	PR1C2.Cq	PR1C3	PR1C3.Cq	PR2C1	PR2C1.Cq	PR2C2	PR2C2.Cq	PR2C3	PR2C3Cq	PR3C1	PR3C1.Cq	PR3C2	PR3C2.Cq	PR3C3	PR3C3.Cq	PC1C1	PC1C1.Cq	PC1C2	PC1C2.Cq	PC1C3	PC1C3.Cq	PC2C1	PC2C1.Cq	PC2C2	PC2C2.Cq	PC2C3	PC2C3.Cq
spl.1	C1	24.97	C2	29.84	C3	28.77	C1	25.06	C2	30.2	C3	28.21	C1	25.48	C2	30.25	C3	28.27	C1	24.35	C2	30.68	C3	28.14	C1	25.4	C2	29.77	C3	28.06
spl.1	C1	25.16	C2	30.74	C3	28.81	C1	25.09	C2	30.12	C3	28.48	C1	25.34	C2	30.09	C3	28.6	C1	24.88	C2	29.77	C3	28.39	C1	25.31	C2	30.22	C3	28.79
spl.1	C1	25.37	C2	30.75	C3	28.43	C1	24.97	C2	30.48	C3	28.3	C1	25.1	C2	30.17	C3	28.71	C1	24.99	C2	30.31	C3	28.37	C1	25.08	C2	30.14	C3	28.81
spl.1	PR1	26.35	PR1	26.17	PR1	27.08	PR2	28.21	PR2	28.48	PR2	28.39	PR3	30.1	PR3	29.99	PR3	30.23	PC1	20.25	PC1	20.5	PC1	20.88	PC2	25.6	PC2	24.97	PC2	25.81
spl.1	PR1	26.59	PR1	26.98	PR1	27.02	PR2	28.32	PR2	28.25	PR2	28.64	PR3	29.81	PR3	29.83	PR3	30.47	PC1	20.75	PC1	20.89	PC1	21.13	PC2	25.67	PC2	25.81	PC2	26
spl.1	PR1	26.74	PR1	26.82	PR1	26.76	PR2	28.17	PR2	28.72	PR2	28.45	PR3	29.55	PR3	29.77	PR3	30.72	PC1	20.93	PC1	21.2	PC1	21.11	PC2	25.3	PC2	25.04	PC2	26.17
spl.2	C1	27.38	C2	31.74	C3	30.52	C1	27.32	C2	30.83	C3	30.06	C1	27.57	C2	30.61	C3	29.71	C1	26.61	C2	31.41	C3	29.78	C1	27.31	C2	31.05	C3	30.02
spl.2	C1	27	C2	31.23	C3	29.37	C1	26.97	C2	31.34	C3	29.55	C1	27.02	C2	31.09	C3	29.52	C1	26.79	C2	31.92	C3	29.77	C1	26.93	C2	31.63	C3	30.25
spl.2	C1	27.25	C2	31.3	C3	29.72	C1	26.92	C2	32.08	C3	29.62	C1	27.06	C2	31.33	C3	29.57	C1	27.04	C2	32.06	C3	29.58	C1	27.22	C2	31.32	C3	30.26
spl.2	PR1	29.62	PR1	29.93	PR1	29.58	PR2	31.98	PR2	31.52	PR2	31.89	PR3	33.42	PR3	33.24	PR3	33.24	PC1	22.6	PC1	23.34	PC1	23.01	PC2	27.68	PC2	27.47	PC2	27.71
spl.2	PR1	29.24	PR1	29.19	PR1	29.04	PR2	31.95	PR2	31.83	PR2	31.74	PR3	33.11	PR3	32.47	PR3	33.31	PC1	22.81	PC1	23.58	PC1	23.17	PC2	27.33	PC2	27.99	PC2	27.72
spl.2	PR1	29.33	PR1	29.29	PR1	29.42	PR2	31.6	PR2	32.61	PR2	31.88	PR3	33.03	PR3	32.93	PR3	33.55	PC1	23.1	PC1	23.9	PC1	23.17	PC2	27.56	PC2	27.64	PC2	27.9
spl.3	C1	26.83	C2	30.96	C3	29.11	C1	27.19	C2	32.19	C3	29.12	C1	26.87	C2	32.11	C3	28.73	C1	26.08	C2	31.37	C3	28.85	C1	27.01	C2	30.85	C3	29.05
spl.3	C1	26.78	C2	31.93	C3	28.61	C1	26.68	C2	30.99	C3	28.64	C1	26.78	C2	32	C3	28.4	C1	26.23	C2	31.49	C3	28.65	C1	27.13	C2	31.08	C3	29.23
spl.3	C1	26.43	C2	31.96	C3	29.22	C1	26.62	C2	31.95	C3	28.78	C1	26.2	C2	30.75	C3	28.99	C1	26.28	C2	32.06	C3	28.86	C1	26.93	C2	31.49	C3	28.85
spl.3	PR1	27.79	PR1	27.19	PR1	27.77	PR2	30.37	PR2	30.7	PR2	29.79	PR3	31.22	PR3	30.44	PR3	31.06	PC1	22.56	PC1	22.95	PC1	23.06	PC2	27.64	PC2	26.91	PC2	27.65
spl.3	PR1	27.72	PR1	27.9	PR1	27.57	PR2	29.9	PR2	29.22	PR2	29.56	PR3	31.07	PR3	31.58	PR3	31.21	PC1	22.69	PC1	23.09	PC1	23.12	PC2	27.8	PC2	27.17	PC2	27.75
spl.3	PR1	27.5	PR1	28.03	PR1	28.12	PR2	29.76	PR2	30.42	PR2	29.8	PR3	30.46	PR3	31.63	PR3	31.81	PC1	22.76	PC1	23.47	PC1	23.21	PC2	27.47	PC2	27.64	PC2	27.65
spl.4	C1	24.17	C2	30.55	C3	27.94	C1	24.77	C2	30.23	C3	27.55	C1	24.32	C2	29.11	C3	27.67	C1	23.61	C2	30.55	C3	28.01	C1	24.17	C2	29.52	C3	28.27
spl.4	C1	24.14	C2	30.24	C3	27.62	C1	24.16	C2	29.76	C3	27.98	C1	24.19	C2	29.41	C3	27.55	C1	23.97	C2	30.66	C3	27.69	C1	24.32	C2	30.23	C3	28.54
spl.4	C1	24.34	C2	30.36	C3	27.69	C1	24.2	C2	30.21	C3	27.35	C1	24.11	C2	30.37	C3	27.64	C1	24.14	C2	30.89	C3	27.49	C1	24.77	C2	30.3	C3	27.73
spl.4	PR1	26.5	PR1	26.91	PR1	26.72	PR2	28.39	PR2	27.98	PR2	27.8	PR3	29.88	PR3	29.12	PR3	30.38	PC1	20.19	PC1	21	PC1	21.05	PC2	25.26	PC2	24.9	PC2	25.79
spl.4	PR1	26.42	PR1	26.51	PR1	26.51	PR2	27.86	PR2	27.66	PR2	28.43	PR3	29.78	PR3	30.4	PR3	30.36	PC1	20.5	PC1	21.26	PC1	21.05	PC2	25.29	PC2	25.51	PC2	25.88
spl.4	PR1	26.58	PR1	26.75	PR1	26.68	PR2	27.84	PR2	28.1	PR2	27.9	PR3	29.62	PR3	29.43	PR3	30.61	PC1	20.74	PC1	21.59	PC1	21.12	PC2	25.78	PC2	25.61	PC2	25.89
spl.5	C1	25.09	C2	30.99	C3	27.51	C1	25.6	C2	30.74	C3	27.98	C1	25.46	C2	30.25	C3	27.86	C1	25.25	C2	30.54	C3	27.79	C1	25.13	C2	30.37	C3	28.09
spl.5	C1	25.45	C2	30.23	C3	27.76	C1	25.34	C2	30.69	C3	27.63	C1	25.52	C2	31.72	C3	27.85	C1	25.47	C2	31.2	C3	27.84	C1	25.4	C2	31.12	C3	28.06
spl.5	C1	25.44	C2	30.45	C3	27.88	C1	25.47	C2	30.25	C3	27.64	C1	25.57	C2	31.3	C3	27.46	C1	25.56	C2	31.32	C3	27.89	C1	25.35	C2	30.38	C3	27.87
spl.5	PR1	26.34	PR1	26.81	PR1	26.27	PR2	28.3	PR2	28.24	PR2	28.24	PR3	30.09	PR3	29.73	PR3	30.32	PC1	23.94	PC1	23.56	PC1	24.02	PC2	27.73	PC2	27.8	PC2	28.49
spl.5	PR1	26.62	PR1	26.05	PR1	26.6	PR2	28	PR2	28.03	PR2	28.1	PR3	30.05	PR3	30.92	PR3	30.45	PC1	24.14	PC1	24.14	PC1	24.16	PC2	28.03	PC2	28.29	PC2	28.32
spl.5	PR1	26.73	PR1	26.24	PR1	26.84	PR2	28.17	PR2	27.66	PR2	28.22	PR3	30.14	PR3	30.73	PR3	30.21	PC1	24.18	PC1	24.4	PC1	24.43	PC2	27.98	PC2	27.76	PC2	28.48
spl.6	C1	24.98	C2	30.78	C3	26.48	C1	25.02	C2	30.04	C3	26.74	C1	25.05	C2	29.51	C3	26.75	C1	24.6	C2	29.85	C3	27.06	C1	24.3	C2	30.19	C3	26.97
spl.6	C1	24.51	C2	29.57	C3	26.29	C1	24.35	C2	30.22	C3	26.49	C1	24.86	C2	30.37	C3	26.33	C1	24.86	C2	30.08	C3	26.74	C1	24.98	C2	29.88	C3	26.98
spl.6	C1	24.51	C2	30.09	C3	26.28	C1	24.56	C2	30.53	C3	26.45	C1	25.01	C2	29.98	C3	26.53	C1	24.87	C2	30.29	C3	26.67	C1	24.91	C2	30.5	C3	26.76
spl.6	PR1	26.79	PR1	27.16	PR1	26.59	PR2	28.07	PR2	28.44	PR2	28.18	PR3	29.88	PR3	30.08	PR3	30.34	PC1	23.53	PC1	23.19	PC1	24.37	PC2	26.85	PC2	27.44	PC2	27.92
spl.6	PR1	26.23	PR1	25.87	PR1	26.46	PR2	27.53	PR2	28.23	PR2	28.11	PR3	29.66	PR3	29.52	PR3	30.14	PC1	23.74	PC1	23.56	PC1	24.13	PC2	27.33	PC2	27.15	PC2	27.96
spl.6	PR1	26.29	PR1	26.35	PR1	26.51	PR2	27.66	PR2	28.41	PR2	28.2	PR3	29.84	PR3	29.63	PR3	30.36	PC1	23.88	PC1	23.98	PC1	24.12	PC2	27.33	PC2	27.85	PC2	27.82
spl.7	C1	25.65	C2	31.27	C3	27.86	C1	26.1	C2	29.91	C3	27.44	C1	26.13	C2	31.2	C3	27.78	C1	25.62	C2	29.75	C3	27.32	C1	25.67	C2	29.49	C3	25.57
spl.7	C1	25.55	C2	30.07	C3	27.13	C1	26.12	C2	30.5	C3	27.48	C1	26.24	C2	30.49	C3	27.04	C1	25.64	C2	29.88	C3	27.27	C1	25.91	C2	29.7	C3	27.18
spl.7	C1	26.09	C2	29.76	C3	27.36	C1	26.26	C2	30.71	C3	27.46	C1	26.21	C2	30.4	C3	26.98	C1	25.92	C2	30.43	C3	26.93	C1	25.21	C2	30.1	C3	27.26
spl.7	PR1	26.89	PR1	27.9	PR1	27.39	PR2	29.06	PR2	28.97	PR2	29.17	PR3	30.87	PR3	31.71	PR3	31.53	PC1	21.32	PC1	21.2	PC1	21.48	PC2	25.4	PC2	25.28	PC2	25.79
spl.7	PR1	26.94	PR1	27.07	PR1	27.19	PR2	29.04	PR2	29.5	PR2	29.25	PR3	30.85	PR3	31.02	PR3	30.95	PC1	21.39	PC1	21.21	PC1	21.72	PC2	25.63	PC2	25.26	PC2	25.81
spl.7	PR1	27.2	PR1	26.78	PR1	27.4	PR2	29.12	PR2	29.72	PR2	29.36	PR3	30.79	PR3	31.15	PR3	30.92	PC1	21.67	PC1	21.88	PC1	21.74	PC2	25	PC2	25.77	PC2	25.97
spl.8	C1	25.54	C2	29.95	C3	27.27	C1	25.85	C2	29.27	C3	27.47	C1	25.89	C2	29.61	C3	26.97	C1	25.2	C2	29.31	C3	27.02	C1	25.26	C2	30.63	C3	27.15
spl.8	C1	25.37	C2	29.73	C3	27.11	C1	26	C2	30.1	C3	27.42	C1	26.16	C2	29.86	C3	27.13	C1	25.28	C2	29.71	C3	26.98	C1	25.18	C2	30.66	C3	26.95
spl.8	C1	25.5	C2	30.01	C3	26.92	C1	25.51	C2	29.79	C3	27.29	C1	25.99	C2	29.73	C3	27.02	C1	25.53	C2	30.07	C3	27.06	C1	25.39	C2	29.89	C3	27.34
spl.8	PR1	25.88	PR1	26.07	PR1	26.19	PR2	27.98	PR2	27.23	PR2	28.22	PR3	29.77	PR3	29.74	PR3	29.85	PC1	21.26	PC1	21.02	PC1	21.57	PC2	25.19	PC2	25.97	PC2	25.43
spl.8	PR1	25.76	PR1	25.92	PR1	26.16	PR2	28.2	PR2	28.31	PR2	28.34	PR3	30	PR3	29.48	PR3	30.13	PC1	21.4	PC1	21.36	PC1	21.59	PC2	24.99	PC2	26.16	PC2	25.66
spl.8	PR1	25.93	PR1	26.19	PR1	26.17	PR2	27.67	PR2	28.16	PR2	28.31	PR3	29.88	PR3	29.58	PR3	30.07	PC1	21.54	PC1	21.72	PC1	21.86	PC2	25.21	PC2	25.54	PC2	26.12
spl.9	C1	26.53	C2	29.4	C3	28.25	C1	26.35	C2	30.31	C3	28.75	C1	26.48	C2	31.16	C3	28.44	C1	26.36	C2	29.86	C3	28.78	C1	26.9	C2	29.83	C3	29.27
spl.9	C1	26.51	C2	29.88	C3	28.65	C1	26.82	C2	30.71	C3	28.75	C1	25.44	C2	30.78	C3	28.58	C1	26.49	C2	30.57	C3	28.99	C1	26.95	C2	30.68	C3	29.19
spl.9	C1	26.65	C2	30.27	C3	28.68	C1	26.75	C2	30.56	C3	28.78	C1	26.55	C2	31.9	C3	29	C1	26.71	C2	30.82	C3	28.92	C1	26.69	C2	30.23	C3	29.38
spl.9	PR1	26.98	PR1	26.22	PR1	26.71	PR2	29.19	PR2	29.19	PR2	29.32	PR3	30.52	PR3	32.33	PR3	30.8	PC1	24.87	PC1	24.38	PC1	25.24	PC2	29.35	PC2	28.74	PC2	29.69
spl.9	PR1	27.02	PR1	26.71	PR1	27.14	PR2	29.56	PR2	29.56	PR2	29.3	PR3	29.69	PR3	31.47	PR3	30.96	PC1	25.06	PC1	24.96	PC1	25.24	PC2	29.5	PC2	29.33	PC2	29.64
spl.9	PR1	27.26	PR1	27.07	PR1	26.98	PR2	29.42	PR2	29.67	PR2	29.38	PR3	30.61	PR3	31.25	PR3	31.4	PC1	25.2	PC1	25.19	PC1	25.27	PC2	29.21	PC2	28.93	PC2	29.66
spl.10	C1	25.83	C2	31.79	C3	28.49	C1	25.44	C2	32.07	C3	28.94	C1	25.88	C2	31.43	C3	28.91	C1	25.27	C2	30.74	C3	29.12	C1	26.27	C2	31.12	C3	29.47
spl.10	C1	26.15	C2	31.52	C3	29.15	C1	25.45	C2	31.87	C3	28.96	C1	25.37	C2	31.27	C3	29.16	C1	25.83	C2	30.96	C3	28.99	C1	26.14	C2	31.26	C3	29.23
spl.10	C1	25.76	C2	31.69	C3	28.52	C1	25.93	C2	31.79	C3	28.99	C1	26.64	C2	32.24	C3	28.76	C1	26.09	C2	31.11	C3	29.05	C1	25.95	C2	31.47	C3	29.34
spl.10	PR1	26.94	PR1	27.34	PR1	26.89	PR2	28.34	PR2	29.48	PR2	29.41	PR3	30.22	PR3	31.29	PR3	30.98	PC1	23.62	PC1	23.76	PC1	24.83	PC2	28.7	PC2	28.19	PC2	28.72
spl.10	PR1	27.28	PR1	27.22	PR1	27.64	PR2	28.44	PR2	29.3	PR2	29.46	PR3	29.94	PR3	30.42	PR3	31.36	PC1	24.28	PC1	23.89	PC1	24.85	PC2	28.71	PC2	28.65	PC2	28.72
spl.10	PR1	26.98	PR1	27.53	PR1	27.11	PR2	28.86	PR2	29.24	PR2	29.39	PR3	30.95	PR3	30.63	PR3	31.06	PC1	24.4	PC1	24.27	PC1	24.9	PC2	28.53	PC2	28.82	PC2	28.89
spl.11	C1	25.91	C2	31.8	C3	27.71	C1	26.34	C2	31.8	C3	27.9	C1	26.91	C2	31.59	C3	27.99	C1	25.88	C2	31.1	C3	28.13	C1	25.81	C2	30.69	C3	28.33
spl.11	C1	26.72	C2	31.73	C3	28.26	C1	25.99	C2	31.45	C3	27.77	C1	26.53	C2	31.93	C3	27.96	C1	26.28	C2	31.85	C3	28.28	C1	26.83	C2	31.15	C3	28.34
spl.11	C1	26.06	C2	31.25	C3	27.89	C1	26.86	C2	31.54	C3	28.04	C1	26.78	C2	30.84	C3	28.28	C1	26.3	C2	32.15	C3	28.11	C1	25.9	C2	30.75	C3	28.5
spl.11	PR1	26.31	PR1	27.47	PR1	26.58	PR2	28.4	PR2	29.27	PR2	28.64	PR3	30.79	PR3	31.24	PR3	30.79	PC1	22.54	PC1	22.96	PC1	23.34	PC2	25.92	PC2	26.11	PC2	26.97
spl.11	PR1	27.02	PR1	27.39	PR1	27.16	PR2	28.07	PR2	29.08	PR2	28.52	PR3	30.28	PR3	30.9	PR3	30.67	PC1	22.92	PC1	23.46	PC1	23.5	PC2	26.86	PC2	26.63	PC2	26.88
spl.11	PR1	26.42	PR1	27.06	PR1	26.85	PR2	28.82	PR2	29.1	PR2	28.72	PR3	30.51	PR3	30.17	PR3	31.12	PC1	22.92	PC1	23.82	PC1	23.48	PC2	25.97	PC2	26.18	PC2	27.12
spl.12	C1	26.98	C2	31.63	C3	28.91	C1	26.77	C2	31.75	C3	29.22	C1	27.06	C2	31.29	C3	29.25	C1	26.48	C2	30.45	C3	30.01	C1	27.59	C2	31.8	C3	30.06
spl.12	C1	26.86	C2	30.97	C3	29.76	C1	27.23	C2	31.13	C3	29.39	C1	27.05	C2	32.02	C3	29.34	C1	26.54	C2	31.63	C3	29.83	C1	27.42	C2	31.67	C3	30.1
spl.12	C1	27.47	C2	31.83	C3	29.47	C1	26.54	C2	31.74	C3	29.54	C1	26.55	C2	31.28	C3	29.43	C1	26.82	C2	31.77	C3	29.99	C1	26.94	C2	30.94	C3	30.21
spl.12	PR1	27.42	PR1	27.77	PR1	27.04	PR2	30.09	PR2	31.46	PR2	30.19	PR3	31.82	PR3	32.49	PR3	32.51	PC1	30.4	PC1	30	PC1	31.64	PC2	35.32	PC2	35.45	PC2	34.84
spl.12	PR1	27.33	PR1	27.18	PR1	27.8	PR2	30.51	PR2	30.42	PR2	30.3	PR3	32.08	PR3	33.09	PR3	32.48	PC1	30.56	PC1	31.01	PC1	31.16	PC2	35.67	PC2	34.33	PC2	34.8
spl.12	PR1	27.82	PR1	27.95	PR1	27.45	PR2	29.88	PR2	30.79	PR2	30.24	PR3	31.63	PR3	32.22	PR3	32.54	PC1	31.02	PC1	31.95	PC1	31.45	PC2	35.27	PC2	34.02	PC2	35.44
spl.13	C1	28.25	C2	32.83	C3	30	C1	28.44	C2	32.58	C3	29.97	C1	28.2	C2	32.55	C3	29.72	C1	27.63	C2	32.19	C3	29.76	C1	28.26	C2	32.12	C3	30.36
spl.13	C1	28.12	C2	32.62	C3	29.87	C1	27.94	C2	32.97	C3	30.02	C1	28.13	C2	32.52	C3	29.84	C1	27.66	C2	32.28	C3	29.74	C1	27.98	C2	32	C3	30.7
spl.13	C1	28.23	C2	32.44	C3	29.86	C1	28.1	C2	32.71	C3	30.18	C1	28.46	C2	32.35	C3	30.08	C1	27.8	C2	32.65	C3	29.84	C1	27.92	C2	32.7	C3	30.71
spl.13	PR1	28.8	PR1	29.41	PR1	29.06	PR2	31.35	PR2	31.54	PR2	31.2	PR3	32.59	PR3	33	PR3	32.68	PC1	22.73	PC1	22.7	PC1	23.23	PC2	27.62	PC2	26.9	PC2	27.63
spl.13	PR1	28.85	PR1	29.2	PR1	28.9	PR2	30.87	PR2	31.93	PR2	31.34	PR3	32.53	PR3	32.68	PR3	33.05	PC1	22.84	PC1	22.87	PC1	23.23	PC2	27.28	PC2	26.95	PC2	27.66
spl.13	PR1	29.13	PR1	28.9	PR1	28.84	PR2	30.78	PR2	31.31	PR2	31.47	PR3	32.69	PR3	32.69	PR3	33.17	PC1	22.86	PC1	23.22	PC1	23.23	PC2	27.31	PC2	27.54	PC2	27.96
spl.14	C1	25.96	C2	31.87	C3	28.53	C1	26.3	C2	31.31	C3	28.7	C1	26.23	C2	30.91	C3	28.91	C1	25.74	C2	30.92	C3	29.17	C1	26.72	C2	31.54	C3	29.19
spl.14	C1	26.11	C2	31.37	C3	28.42	C1	25.92	C2	31.1	C3	28.72	C1	26.54	C2	30.26	C3	28.69	C1	26.22	C2	31.54	C3	29.01	C1	25.89	C2	31.23	C3	29.2
spl.14	C1	25.74	C2	31.51	C3	28.72	C1	26.11	C2	31.65	C3	28.9	C1	25.95	C2	31.15	C3	28.74	C1	26.23	C2	31.71	C3	29.09	C1	26.52	C2	31.23	C3	29.32
spl.14	PR1	27.3	PR1	27.87	PR1	27.33	PR2	29.4	PR2	29.36	PR2	29.35	PR3	30.59	PR3	29.89	PR3	31.4	PC1	26.5	PC1	26.38	PC1	27.4	PC2	31.13	PC2	30.79	PC2	31.33
spl.14	PR1	27.39	PR1	27.52	PR1	27.31	PR2	28.97	PR2	29.34	PR2	29.41	PR3	30.94	PR3	30.28	PR3	31.12	PC1	26.87	PC1	27.03	PC1	27.32	PC2	30.42	PC2	30.76	PC2	31.38
spl.14	PR1	27.37	PR1	27.86	PR1	27.43	PR2	29.05	PR2	29.73	PR2	29.66	PR3	30.3	PR3	30.69	PR3	31.12	PC1	26.91	PC1	27.12	PC1	27.47	PC2	31.03	PC2	30.59	PC2	31.59
spl.15	C1	27.55	C2	32.19	C3	29.26	C1	27.39	C2	32.34	C3	27.94	C1	27.36	C2	31.63	C3	27.9	C1	26.61	C2	31.04	C3	28.08	C1	27.44	C2	31.51	C3	29.35
spl.15	C1	27.27	C2	32.05	C3	29.16	C1	27.31	C2	32.55	C3	29.43	C1	26.95	C2	33.08	C3	29.18	C1	26.73	C2	32.93	C3	29.44	C1	27.3	C2	31.9	C3	28.76
spl.15	C1	27.43	C2	32.35	C3	29.13	C1	27.24	C2	32.85	C3	28.78	C1	27.43	C2	33.08	C3	29.04	C1	27.07	C2	33.21	C3	29.43	C1	27.31	C2	32.14	C3	29.3
spl.15	PR1	29.13	PR1	28.89	PR1	29.38	PR2	30.75	PR2	30.77	PR2	29.8	PR3	31.99	PR3	33	PR3	31.55	PC1	23.19	PC1	22.48	PC1	23.15	PC2	27.96	PC2	27.25	PC2	28.14
spl.15	PR1	28.81	PR1	28.91	PR1	29.16	PR2	30.64	PR2	30.83	PR2	31.23	PR3	31.58	PR3	31.7	PR3	32.82	PC1	23.2	PC1	24	PC1	24.41	PC2	27.77	PC2	27.33	PC2	27.59
spl.15	PR1	29.02	PR1	29.15	PR1	29.17	PR2	30.6	PR2	31.46	PR2	30.68	PR3	32.3	PR3	33.05	PR3	32.87	PC1	23.55	PC1	24.2	PC1	24.38	PC2	27.77	PC2	27.9	PC2	28.19
spl.16	C1	28.38	C2	32.86	C3	30.76	C1	28.59	C2	32.61	C3	31.44	C1	28.68	C2	32.54	C3	31.58	C1	28.03	C2	31.82	C3	31.26	C1	28.58	C2	31.95	C3	32.16
spl.16	C1	28.69	C2	32.43	C3	31.61	C1	28.45	C2	32.89	C3	31.46	C1	28.77	C2	33.24	C3	31.41	C1	28.06	C2	32.97	C3	31.55	C1	28.59	C2	31.78	C3	31.95
spl.16	C1	28.65	C2	33.15	C3	31.54	C1	28.48	C2	33.76	C3	31.53	C1	28.72	C2	32.89	C3	31.46	C1	28.32	C2	33.05	C3	31.58	C1	28.44	C2	32.33	C3	31.84
spl.16	PR1	29.35	PR1	29.85	PR1	29.2	PR2	32.13	PR2	32.31	PR2	32.28	PR3	32.75	PR3	32.88	PR3	33.4	PC1	26.01	PC1	25.52	PC1	26.63	PC2	29.94	PC2	29.57	PC2	30.48
spl.16	PR1	29.69	PR1	29.36	PR1	29.64	PR2	31.96	PR2	32.54	PR2	32.23	PR3	32.72	PR3	33.55	PR3	33.27	PC1	26.03	PC1	26.57	PC1	26.79	PC2	29.84	PC2	29.36	PC2	30.44
spl.16	PR1	29.48	PR1	29.74	PR1	29.68	PR2	31.76	PR2	32.91	PR2	32.52	PR3	32.99	PR3	33.2	PR3	33.52	PC1	26.24	PC1	26.89	PC1	26.79	PC2	29.91	PC2	29.57	PC2	30.4
spl.17	C1	27.89	C2	32.8	C3	30.5	C1	28.27	C2	31.74	C3	30.94	C1	27.98	C2	31.35	C3	30.69	C1	27.48	C2	31.02	C3	30.78	C1	28	C2	31.77	C3	31.36
spl.17	C1	28.08	C2	32.56	C3	30.54	C1	28.28	C2	32.91	C3	30.93	C1	28.03	C2	33.07	C3	30.73	C1	27.51	C2	31.82	C3	31.22	C1	28.93	C2	31.49	C3	31.03
spl.17	C1	27.93	C2	31.96	C3	30.71	C1	27.81	C2	31.78	C3	31.06	C1	28.51	C2	32.15	C3	30.67	C1	28.2	C2	31.88	C3	30.8	C1	27.86	C2	32.17	C3	30.71
spl.17	PR1	29.34	PR1	29.84	PR1	29.17	PR2	32.13	PR2	31.73	PR2	32.14	PR3	32.86	PR3	32.41	PR3	33.17	PC1	24.22	PC1	23.81	PC1	24.99	PC2	28.13	PC2	27.79	PC2	28.53
spl.17	PR1	29.47	PR1	30.12	PR1	29.38	PR2	32.08	PR2	32.77	PR2	32.05	PR3	33	PR3	32.71	PR3	33.39	PC1	24.38	PC1	24.55	PC1	25.27	PC2	29.03	PC2	27.8	PC2	28.59
spl.17	PR1	29.33	PR1	29.37	PR1	29.41	PR2	31.73	PR2	31.73	PR2	32.49	PR3	33.28	PR3	33.97	PR3	33.35	PC1	24.95	PC1	24.59	PC1	24.98	PC2	27.91	PC2	28.43	PC2	28.5
spl.18	C1	29.88	C2	33.29	C3	31.14	C1	30.24	C2	33.62	C3	30.85	C1	30.41	C2	33.13	C3	30.97	C1	29.5	C2	32.33	C3	31.31	C1	30	C2	32.52	C3	31.65
spl.18	C1	29.47	C2	33.87	C3	31.14	C1	30.11	C2	33.85	C3	31.56	C1	30.2	C2	33.51	C3	31.04	C1	29.69	C2	33.28	C3	31.26	C1	30	C2	33.37	C3	31.58
spl.18	C1	29.75	C2	33.35	C3	31.25	C1	29.61	C2	33.23	C3	31.41	C1	29.89	C2	33.72	C3	31.37	C1	29.77	C2	33.72	C3	31.28	C1	30.05	C2	32.84	C3	31.47
spl.18	PR1	29.04	PR1	29.48	PR1	28.94	PR2	32.27	PR2	32.85	PR2	32.09	PR3	33.48	PR3	32.7	PR3	33.26	PC1	26.83	PC1	26.36	PC1	27.35	PC2	30.85	PC2	30.59	PC2	31.37
spl.18	PR1	28.84	PR1	29.7	PR1	29.35	PR2	32.79	PR2	32.76	PR2	32.53	PR3	33.09	PR3	33.74	PR3	33.2	PC1	27.01	PC1	26.97	PC1	27.44	PC2	31.01	PC2	31.13	PC2	31.11
spl.18	PR1	29.01	PR1	29.09	PR1	29.15	PR2	31.9	PR2	32.44	PR2	32.43	PR3	33.09	PR3	33.78	PR3	33.55	PC1	27.16	PC1	27.53	PC1	27.36	PC2	31.09	PC2	30.59	PC2	31.46
spl.19	C1	26.3	C2	33.11	C3	29.15	C1	26.91	C2	31.78	C3	29.39	C1	26.55	C2	31.26	C3	29.43	C1	26.23	C2	31.32	C3	29.64	C1	26.72	C2	31.91	C3	30.85
spl.19	C1	26.44	C2	32.48	C3	29.9	C1	27.19	C2	32.52	C3	29.61	C1	26.41	C2	32.56	C3	29.64	C1	26.57	C2	31.36	C3	29.58	C1	26.71	C2	32.41	C3	30.35
spl.19	C1	26.39	C2	32.86	C3	29.86	C1	27.01	C2	32.49	C3	29.78	C1	26.95	C2	33.12	C3	29.6	C1	26.61	C2	31.82	C3	29.71	C1	27.04	C2	32.61	C3	29.99
spl.19	PR1	28.06	PR1	29.13	PR1	28.14	PR2	30.58	PR2	30.18	PR2	30.45	PR3	31.77	PR3	31.29	PR3	32.42	PC1	23.37	PC1	23.01	PC1	24.23	PC2	26.79	PC2	26.61	PC2	27.14
spl.19	PR1	28.04	PR1	28.66	PR1	28.64	PR2	30.7	PR2	30.95	PR2	30.49	PR3	31.55	PR3	32.84	PR3	32.54	PC1	23.72	PC1	23.13	PC1	24.09	PC2	26.68	PC2	26.61	PC2	27.12
spl.19	PR1	28.09	PR1	29.15	PR1	28.75	PR2	30.73	PR2	31.06	PR2	30.7	PR3	31.97	PR3	32.3	PR3	32.28	PC1	23.74	PC1	23.53	PC1	24.18	PC2	27.06	PC2	26.85	PC2	27.11
spl.20	C1	26.43	C2	31.63	C3	27.11	C1	26.44	C2	30.75	C3	27.4	C1	26.74	C2	31.67	C3	27.37	C1	25.66	C2	30.52	C3	27.43	C1	26.68	C2	30.52	C3	27.86
spl.20	C1	26.54	C2	30.73	C3	27.4	C1	26.81	C2	31.06	C3	27.43	C1	25.71	C2	31.75	C3	27.23	C1	25.94	C2	30.79	C3	27.48	C1	26.54	C2	30.97	C3	27.83
spl.20	C1	26.13	C2	31.78	C3	27.63	C1	26.79	C2	30.67	C3	27.68	C1	26.5	C2	31.48	C3	27.33	C1	26.54	C2	30.93	C3	27.7	C1	26.58	C2	31.15	C3	27.74
spl.20	PR1	26.96	PR1	27.38	PR1	26.69	PR2	28.86	PR2	28.46	PR2	28.8	PR3	31	PR3	31.41	PR3	31.28	PC1	23.82	PC1	24	PC1	24.79	PC2	28.82	PC2	28.09	PC2	28.94
spl.20	PR1	26.99	PR1	26.59	PR1	26.96	PR2	29.24	PR2	28.92	PR2	28.94	PR3	30.05	PR3	31.64	PR3	31.02	PC1	24.11	PC1	24.32	PC1	24.75	PC2	28.5	PC2	28.63	PC2	28.97
spl.20	PR1	26.85	PR1	27.51	PR1	27.35	PR2	29.19	PR2	28.57	PR2	29.3	PR3	30.85	PR3	31.4	PR3	31.32	PC1	24.87	PC1	24.51	PC1	25.14	PC2	28.75	PC2	28.67	PC2	29.11
spl.22	C1	25.96	C2	30.35	C3	27.23	C1	26.18	C2	30.56	C3	27.83	C1	26.09	C2	30.42	C3	27.72	C1	25.56	C2	29.92	C3	27.97	C1	26.33	C2	29.88	C3	28.23
spl.22	C1	26.08	C2	30.91	C3	27.65	C1	25.94	C2	30.46	C3	27.77	C1	25.95	C2	30.48	C3	27.81	C1	25.7	C2	30.84	C3	28.06	C1	26.34	C2	30.05	C3	28.19
spl.22	C1	25.83	C2	30.69	C3	27.56	C1	26.11	C2	30.14	C3	27.95	C1	26.19	C2	31.26	C3	28.1	C1	25.7	C2	30.91	C3	27.9	C1	26.57	C2	30.32	C3	28.22
spl.22	PR1	27.07	PR1	26.89	PR1	26.96	PR2	29.06	PR2	28.93	PR2	29.33	PR3	30.22	PR3	30.3	PR3	31.03	PC1	22.67	PC1	22.4	PC1	23.71	PC2	26.79	PC2	26.07	PC2	27.36
spl.22	PR1	27.04	PR1	27.33	PR1	27.21	PR2	28.68	PR2	28.72	PR2	29.37	PR3	30.23	PR3	30.31	PR3	31.04	PC1	22.83	PC1	23.26	PC1	23.84	PC2	26.85	PC2	26.13	PC2	27.2
spl.22	PR1	26.9	PR1	27.2	PR1	27.26	PR2	28.88	PR2	28.52	PR2	29.55	PR3	30.48	PR3	31.16	PR3	31.5	PC1	22.85	PC1	23.32	PC1	23.75	PC2	26.96	PC2	26.42	PC2	27.22
spl.23	C1	26.25	C2	30.51	C3	27.35	C1	26.19	C2	30.27	C3	27.66	C1	25.97	C2	30.16	C3	27.56	C1	25.97	C2	29.98	C3	27.72	C1	25.89	C2	29.28	C3	27.93
spl.23	C1	26.3	C2	30.63	C3	27.8	C1	26.79	C2	31.06	C3	27.59	C1	25.82	C2	30.51	C3	27.49	C1	26.24	C2	30.18	C3	27.77	C1	25.91	C2	29.99	C3	27.96
spl.23	C1	26.3	C2	30.86	C3	27.73	C1	26.8	C2	30.79	C3	28.22	C1	26.12	C2	30.44	C3	27.74	C1	26.34	C2	30.27	C3	27.85	C1	25.82	C2	30.42	C3	27.93
spl.23	PR1	26.87	PR1	26.83	PR1	26.89	PR2	28.72	PR2	28.48	PR2	29	PR3	29.87	PR3	30.39	PR3	30.72	PC1	24.07	PC1	23.76	PC1	24.68	PC2	27.23	PC2	26.7	PC2	27.86
spl.23	PR1	26.86	PR1	27.05	PR1	27.14	PR2	29.18	PR2	29.18	PR2	28.87	PR3	29.78	PR3	30.3	PR3	30.73	PC1	24.33	PC1	24.05	PC1	24.66	PC2	27.2	PC2	27.15	PC2	28.02
spl.23	PR1	26.92	PR1	27.11	PR1	27.11	PR2	29.4	PR2	29.13	PR2	29.64	PR3	30.16	PR3	30.09	PR3	31.12	PC1	24.5	PC1	24.1	PC1	24.73	PC2	26.95	PC2	27.39	PC2	28.04
spl.24	C1	26.49	C2	31.49	C3	28.78	C1	26.61	C2	32.03	C3	29.04	C1	26.08	C2	32.23	C3	28.91	C1	26.15	C2	30.92	C3	28.89	C1	26.18	C2	31.26	C3	29.56
spl.24	C1	26.49	C2	31.47	C3	29.3	C1	26.92	C2	31.68	C3	29.38	C1	26.61	C2	31.68	C3	28.8	C1	26.18	C2	31.42	C3	28.85	C1	26.17	C2	30.83	C3	29.09
spl.24	C1	26.8	C2	32.25	C3	29.47	C1	26.63	C2	31.7	C3	29.32	C1	26.19	C2	32.88	C3	29.04	C1	26.34	C2	31.74	C3	29.14	C1	27.04	C2	31.63	C3	29.64
spl.24	PR1	28.14	PR1	28.31	PR1	28.1	PR2	30.47	PR2	31.36	PR2	30.49	PR3	31.31	PR3	32.89	PR3	32.23	PC1	23.33	PC1	23.21	PC1	23.71	PC2	26.79	PC2	27.06	PC2	27.74
spl.24	PR1	28.26	PR1	28.41	PR1	28.5	PR2	30.78	PR2	31.13	PR2	30.81	PR3	31.8	PR3	32.13	PR3	32.03	PC1	23.41	PC1	23.5	PC1	23.82	PC2	26.78	PC2	26.89	PC2	27.53
spl.24	PR1	28.41	PR1	28.89	PR1	28.63	PR2	30.7	PR2	30.88	PR2	30.79	PR3	31.71	PR3	33.12	PR3	32.29	PC1	23.46	PC1	23.96	PC1	23.98	PC2	27.57	PC2	27.69	PC2	27.75
spl.25	C1	29.25	C2	33.22	C3	31.04	C1	29.53	C2	33.36	C3	31.37	C1	28.81	C2	33.49	C3	30.99	C1	28.55	C2	32.11	C3	31.12	C1	29.17	C2	32.2	C3	31.25
spl.25	C1	29.25	C2	32.27	C3	31.25	C1	29.33	C2	33.49	C3	31.72	C1	29.55	C2	33.74	C3	31.4	C1	29.02	C2	32.48	C3	31.2	C1	29.54	C2	33.15	C3	31.76
spl.25	C1	29.47	C2	33.42	C3	31.74	C1	29.5	C2	33.31	C3	32.22	C1	29.45	C2	33.8	C3	31.51	C1	29.05	C2	33.04	C3	31.54	C1	29.14	C2	32.77	C3	31.69
spl.25	PR1	30.79	PR1	30.9	PR1	30.33	PR2	33.88	PR2	34.08	PR2	33.64	PR3	34.12	PR3	35	PR3	34.57	PC1	25.1	PC1	24.55	PC1	25.43	PC2	30.77	PC2	30.26	PC2	30.86
spl.25	PR1	31.07	PR1	30.16	PR1	30.54	PR2	33.9	PR2	34.28	PR2	34.32	PR3	35.03	PR3	35.24	PR3	34.97	PC1	25.24	PC1	25	PC1	25.64	PC2	31.09	PC2	30.83	PC2	31.12
spl.25	PR1	30.93	PR1	31.06	PR1	30.92	PR2	34.18	PR2	33.73	PR2	34.99	PR3	34.47	PR3	35.14	PR3	35.34	PC1	25.53	PC1	25.68	PC1	25.67	PC2	30.76	PC2	30.48	PC2	31.08
spl.26	C1	25.98	C2	31.08	C3	27.93	C1	26.12	C2	30.29	C3	28.5	C1	25.92	C2	31.03	C3	27.96	C1	25.31	C2	30.09	C3	28.29	C1	25.98	C2	30.34	C3	28.43
spl.26	C1	26	C2	31.44	C3	28.24	C1	26	C2	31.65	C3	28.41	C1	25.8	C2	31.16	C3	28.17	C1	25.33	C2	30.27	C3	28.4	C1	26.21	C2	30.92	C3	28.58
spl.26	C1	25.96	C2	30.98	C3	28.46	C1	25.79	C2	30.31	C3	28.72	C1	25.74	C2	30.88	C3	28.38	C1	25.59	C2	30.69	C3	28.43	C1	26.15	C2	30.51	C3	28.61
spl.26	PR1	28.49	PR1	28.76	PR1	28.17	PR2	30.7	PR2	29.84	PR2	30.56	PR3	31.89	PR3	31.96	PR3	31.79	PC1	22.33	PC1	22.03	PC1	22.79	PC2	27.18	PC2	26.98	PC2	27.38
spl.26	PR1	28.71	PR1	29.2	PR1	28.47	PR2	30.59	PR2	31.02	PR2	30.22	PR3	31.67	PR3	32.09	PR3	31.9	PC1	22.36	PC1	22.19	PC1	22.83	PC2	27.5	PC2	27.37	PC2	27.49
spl.26	PR1	28.44	PR1	28.57	PR1	28.58	PR2	30.55	PR2	29.93	PR2	30.46	PR3	31.51	PR3	31.86	PR3	31.92	PC1	22.6	PC1	22.64	PC1	22.75	PC2	27.27	PC2	27.19	PC2	27.4
spl.28	C1	26.75	C2	32.08	C3	28.67	C1	26.74	C2	32.28	C3	28.98	C1	26.06	C2	32.4	C3	28.82	C1	26.19	C2	31.56	C3	28.9	C1	26.76	C2	31.34	C3	29.34
spl.28	C1	26.69	C2	31.69	C3	28.77	C1	27.02	C2	32.41	C3	29.2	C1	27.05	C2	32.19	C3	29.25	C1	26.19	C2	31.66	C3	29.12	C1	26.84	C2	31.53	C3	29.57
spl.28	C1	26.43	C2	31.9	C3	29.21	C1	26.96	C2	31.72	C3	29.67	C1	26.66	C2	32.47	C3	29.18	C1	26.22	C2	32.2	C3	29.36	C1	26.63	C2	31.67	C3	29.72
spl.28	PR1	28.61	PR1	28.8	PR1	28.38	PR2	30.81	PR2	31.02	PR2	30.61	PR3	30.96	PR3	32.56	PR3	31.83	PC1	23.97	PC1	24.1	PC1	24.65	PC2	28.38	PC2	27.95	PC2	28.71
spl.28	PR1	28.65	PR1	28.53	PR1	28.35	PR2	30.84	PR2	31.2	PR2	30.73	PR3	32	PR3	32.52	PR3	32.25	PC1	24.07	PC1	24.27	PC1	24.68	PC2	28.33	PC2	28.21	PC2	28.85
spl.28	PR1	28.47	PR1	28.76	PR1	28.6	PR2	30.79	PR2	30.58	PR2	30.88	PR3	31.54	PR3	32.31	PR3	32	PC1	24.12	PC1	24.84	PC1	24.67	PC2	28.17	PC2	28.47	PC2	28.86
spl.30	C1	31.17	C2	34.63	C3	31.6	C1	31.69	C2	34.51	C3	31.73	C1	30.69	C2	34.05	C3	31.63	C1	30.35	C2	34.07	C3	31.95	C1	31.39	C2	33.69	C3	33.05
spl.30	C1	31.39	C2	34.36	C3	32.14	C1	31.46	C2	34.21	C3	31.93	C1	31.57	C2	35	C3	31.72	C1	30.48	C2	34.92	C3	31.85	C1	31.08	C2	34.93	C3	32.72
spl.30	C1	31.1	C2	34.44	C3	32.41	C1	31.31	C2	33.94	C3	32.61	C1	31.89	C2	34.05	C3	32.11	C1	30.5	C2	35.3	C3	32.23	C1	30.87	C2	34.4	C3	32.67
spl.30	PR1	30.78	PR1	31.32	PR1	31.09	PR2	33.81	PR2	33.85	PR2	33.85	PR3	33.29	PR3	33.81	PR3	34.75	PC1	24.36	PC1	24.21	PC1	25.15	PC2	29.85	PC2	29.32	PC2	30.18
spl.30	PR1	30.99	PR1	31.04	PR1	31.42	PR2	33.81	PR2	33.48	PR2	33.76	PR3	34.14	PR3	33.66	PR3	34.34	PC1	24.6	PC1	25.13	PC1	25.05	PC2	29.98	PC2	29.81	PC2	29.87
spl.30	PR1	30.87	PR1	31.04	PR1	31.43	PR2	33.1	PR2	33.83	PR2	34.41	PR3	34.03	PR3	34.87	PR3	34.56	PC1	24.65	PC1	25.18	PC1	25.06	PC2	29.62	PC2	29.82	PC2	29.85
spl.31	C1	25.02	C2	30.98	C3	28.34	C1	25.71	C2	30.93	C3	28.45	C1	25.01	C2	31.42	C3	28.13	C1	24.73	C2	30.18	C3	28.33	C1	25.48	C2	30.46	C3	28.62
spl.31	C1	25.39	C2	30.6	C3	28.83	C1	24.92	C2	30.24	C3	28.91	C1	25.2	C2	31.55	C3	28.38	C1	24.79	C2	30.34	C3	28.56	C1	24.99	C2	30.49	C3	29.07
spl.31	C1	25.39	C2	30.93	C3	29.2	C1	24.85	C2	30.75	C3	28.86	C1	25.51	C2	30.8	C3	28.72	C1	24.89	C2	31.73	C3	28.68	C1	25.6	C2	30.8	C3	29.08
spl.31	PR1	27.35	PR1	27.88	PR1	27.59	PR2	29.98	PR2	29.67	PR2	29.46	PR3	30.89	PR3	31.99	PR3	31.53	PC1	21.18	PC1	20.83	PC1	21.82	PC2	26.29	PC2	25.84	PC2	26.47
spl.31	PR1	27.58	PR1	27.31	PR1	27.98	PR2	29	PR2	28.72	PR2	29.98	PR3	31.38	PR3	31.32	PR3	31.75	PC1	21.37	PC1	21.07	PC1	21.94	PC2	25.81	PC2	25.95	PC2	26.69
spl.31	PR1	27.68	PR1	27.46	PR1	28.07	PR2	28.96	PR2	29.38	PR2	29.74	PR3	31.62	PR3	32.11	PR3	32	PC1	21.44	PC1	22.45	PC1	21.94	PC2	26.52	PC2	26.28	PC2	26.64
spl.32	C1	27.35	C2	32.2	C3	28.29	C1	28.03	C2	31.54	C3	28.7	C1	27.88	C2	32.29	C3	28.8	C1	26.71	C2	32.53	C3	28.79	C1	27.5	C2	31.33	C3	29.1
spl.32	C1	27.8	C2	32.53	C3	28.89	C1	27.28	C2	32.55	C3	29.05	C1	27.59	C2	32.28	C3	28.84	C1	27.06	C2	32.69	C3	28.87	C1	27.36	C2	32.58	C3	29.27
spl.32	C1	27.4	C2	32.07	C3	29.38	C1	27.55	C2	32.25	C3	29.37	C1	27.85	C2	32.67	C3	29.33	C1	27.36	C2	32.75	C3	29.21	C1	27.62	C2	31.24	C3	29.47
spl.32	PR1	27.55	PR1	27.94	PR1	27.21	PR2	30.22	PR2	29.61	PR2	29.78	PR3	31.38	PR3	31.67	PR3	31.57	PC1	21.49	PC1	22.48	PC1	22.3	PC2	26.96	PC2	26.48	PC2	27.12
spl.32	PR1	27.94	PR1	28.34	PR1	27.81	PR2	29.5	PR2	30.78	PR2	30.1	PR3	31.31	PR3	31.68	PR3	31.47	PC1	21.81	PC1	22.61	PC1	22.3	PC2	26.76	PC2	27.09	PC2	27.26
spl.32	PR1	27.54	PR1	28.37	PR1	28.1	PR2	29.82	PR2	30.49	PR2	30.2	PR3	31.45	PR3	31.94	PR3	31.89	PC1	22.28	PC1	22.79	PC1	22.33	PC2	27.12	PC2	26.46	PC2	27.13
spl.35	C1	27.09	C2	32.05	C3	28.61	C1	27.48	C2	32.06	C3	28.71	C1	27.48	C2	31.88	C3	28.45	C1	27.3	C2	31.64	C3	28.74	C1	27.7	C2	31.96	C3	28.55
spl.35	C1	27.26	C2	31.81	C3	28.28	C1	27.56	C2	32.41	C3	28.65	C1	27.49	C2	32.19	C3	28.32	C1	27.55	C2	32.16	C3	28.46	C1	27.7	C2	32.07	C3	28.25
spl.35	C1	27.2	C2	31.91	C3	28.31	C1	27.42	C2	32.14	C3	28.68	C1	27.46	C2	31.76	C3	28.36	C1	27.32	C2	32.06	C3	28.4	C1	27.57	C2	31.91	C3	28.06
spl.35	PR1	29.59	PR1	30.08	PR1	30.35	PR2	32.36	PR2	32.64	PR2	32.74	PR3	32.74	PR3	33.25	PR3	33.39	PC1	26.62	PC1	26.72	PC1	27.38	PC2	30.98	PC2	31.39	PC2	31.44
spl.35	PR1	29.75	PR1	29.94	PR1	30.24	PR2	32.38	PR2	32.69	PR2	32.81	PR3	32.89	PR3	33.36	PR3	33.77	PC1	26.68	PC1	27.2	PC1	27.28	PC2	31.04	PC2	31.26	PC2	31.24
spl.35	PR1	29.58	PR1	30.01	PR1	30.45	PR2	32.37	PR2	32.81	PR2	32.55	PR3	32.84	PR3	33.57	PR3	33.33	PC1	26.55	PC1	27.01	PC1	27.29	PC2	30.86	PC2	31.37	PC2	31.04
spl.37	C1	27.68	C2	32.08	C3	29.28	C1	27.58	C2	32.59	C3	29.23	C1	27.7	C2	32.89	C3	29.33	C1	27.37	C2	32.27	C3	28.96	C1	28.14	C2	32.43	C3	28.92
spl.37	C1	27.31	C2	32.42	C3	28.97	C1	27.65	C2	32.28	C3	29.07	C1	27.64	C2	32.34	C3	28.9	C1	27.48	C2	32.21	C3	28.83	C1	27.91	C2	32.25	C3	28.64
spl.37	C1	27.42	C2	32.14	C3	28.87	C1	27.57	C2	32.82	C3	29.11	C1	27.48	C2	32.4	C3	28.83	C1	27.51	C2	32.1	C3	28.83	C1	27.72	C2	32.25	C3	28.46
spl.37	PR1	28.14	PR1	28.16	PR1	28.6	PR2	30.17	PR2	30.83	PR2	30.54	PR3	31.5	PR3	32.2	PR3	32.57	PC1	25.28	PC1	25.53	PC1	25.92	PC2	30.07	PC2	30.24	PC2	29.98
spl.37	PR1	27.75	PR1	28.04	PR1	28.39	PR2	30.05	PR2	30.53	PR2	30.42	PR3	31.28	PR3	32.24	PR3	32.53	PC1	25.21	PC1	25.44	PC1	25.76	PC2	29.72	PC2	30.11	PC2	29.84
spl.37	PR1	27.78	PR1	27.99	PR1	28.35	PR2	30	PR2	30.46	PR2	30.56	PR3	31.22	PR3	32.25	PR3	32.49	PC1	25.15	PC1	25.61	PC1	25.78	PC2	29.55	PC2	29.99	PC2	29.76
spl.38	C1	27.91	C2	31.87	C3	27.92	C1	28.36	C2	31.95	C3	28.72	C1	27.82	C2	32.05	C3	28.04	C1	28.08	C2	32.5	C3	28.72	C1	28	C2	31.83	C3	27.88
spl.38	C1	27.47	C2	31.74	C3	27.87	C1	27.75	C2	32.27	C3	28.05	C1	27.75	C2	32.62	C3	27.78	C1	27.24	C2	31.75	C3	29.02	C1	27.45	C2	31.65	C3	27.27
spl.38	C1	27.51	C2	31.77	C3	27.7	C1	27.6	C2	32.11	C3	27.93	C1	27.54	C2	31.93	C3	27.53	C1	27.27	C2	31.51	C3	29.23	C1	27.68	C2	31.77	C3	27.25
spl.38	PR1	28.39	PR1	28.31	PR1	28.52	PR2	30.86	PR2	31.09	PR2	31.32	PR3	31.88	PR3	32.28	PR3	32.91	PC1	23.61	PC1	24	PC1	23.19	PC2	27.96	PC2	27.97	PC2	27.99
spl.38	PR1	28.13	PR1	28.32	PR1	28.66	PR2	30.62	PR2	31.23	PR2	31.04	PR3	31.85	PR3	32.96	PR3	32.68	PC1	23.15	PC1	23.54	PC1	23.4	PC2	27.46	PC2	27.87	PC2	27.61
spl.38	PR1	28.15	PR1	28.34	PR1	28.56	PR2	30.44	PR2	31.03	PR2	31.03	PR3	31.35	PR3	32.27	PR3	32.31	PC1	23.29	PC1	23.47	PC1	23.48	PC2	27.58	PC2	27.88	PC2	27.6
spl.39	C1	26.44	C2	31.04	C3	28.57	C1	26.6	C2	31.21	C3	28.68	C1	26.73	C2	31.01	C3	28.43	C1	26.24	C2	30.46	C3	28.28	C1	26.44	C2	30.59	C3	28.01
spl.39	C1	26.41	C2	30.74	C3	28.36	C1	26.7	C2	31.22	C3	28.66	C1	26.71	C2	31.2	C3	28.43	C1	26.21	C2	31.19	C3	28.15	C1	26.4	C2	30.53	C3	28.1
spl.39	C1	26.49	C2	30.8	C3	28.47	C1	26.71	C2	31.06	C3	28.8	C1	26.72	C2	31.1	C3	28.43	C1	26.21	C2	30.67	C3	28.15	C1	26.42	C2	30.4	C3	27.91
spl.39	PR1	27.44	PR1	27.8	PR1	27.99	PR2	29.65	PR2	30	PR2	30.01	PR3	31.15	PR3	31.91	PR3	32.22	PC1	22.16	PC1	22.32	PC1	22.9	PC2	26.5	PC2	27.02	PC2	26.92
spl.39	PR1	27.66	PR1	27.8	PR1	27.89	PR2	29.52	PR2	30.14	PR2	30	PR3	31.1	PR3	31.63	PR3	32.05	PC1	22.1	PC1	22.92	PC1	22.79	PC2	26.54	PC2	27.01	PC2	26.97
spl.39	PR1	27.65	PR1	27.61	PR1	28.11	PR2	29.59	PR2	30.02	PR2	30.13	PR3	30.95	PR3	31.82	PR3	32.17	PC1	22.12	PC1	22.52	PC1	22.87	PC2	26.53	PC2	27.01	PC2	26.95
spl.40	C1	27.38	C2	31.79	C3	28.51	C1	27.46	C2	32.12	C3	28.75	C1	27.61	C2	32.05	C3	28.64	C1	27.07	C2	31.74	C3	28.35	C1	27.58	C2	31.5	C3	28.05
spl.40	C1	27.24	C2	31.69	C3	28.53	C1	27.41	C2	32.06	C3	28.84	C1	27.44	C2	31.93	C3	28.45	C1	26.92	C2	31.65	C3	28.38	C1	27.34	C2	31.75	C3	28.2
spl.40	C1	27.37	C2	31.83	C3	28.63	C1	27.39	C2	32.1	C3	28.86	C1	27.65	C2	32.21	C3	28.32	C1	26.93	C2	32.06	C3	28.16	C1	27.4	C2	31.55	C3	28.69
spl.40	PR1	28.98	PR1	28.96	PR1	29.41	PR2	30.97	PR2	31.74	PR2	31.96	PR3	32.16	PR3	32.8	PR3	33.09	PC1	22.18	PC1	22.54	PC1	22.87	PC2	27.06	PC2	27.17	PC2	27.02
spl.40	PR1	28.79	PR1	29.13	PR1	29.3	PR2	31	PR2	31.61	PR2	31.87	PR3	32.03	PR3	32.67	PR3	33.23	PC1	22.13	PC1	22.71	PC1	23.1	PC2	26.84	PC2	27.4	PC2	27.24
spl.40	PR1	29	PR1	29.02	PR1	29.44	PR2	31.11	PR2	31.75	PR2	31.86	PR3	32.13	PR3	32.85	PR3	32.67	PC1	22.2	PC1	22.85	PC1	22.84	PC2	26.92	PC2	27.15	PC2	27.49
spl.41	C1	25.57	C2	30.54	C3	27.14	C1	25.69	C2	30.9	C3	27.19	C1	25.66	C2	30.9	C3	26.84	C1	25.63	C2	30.68	C3	26.94	C1	26.02	C2	30.2	C3	26.49
spl.41	C1	25.3	C2	30.63	C3	26.94	C1	25.67	C2	31.01	C3	27.31	C1	25.79	C2	30.63	C3	26.86	C1	25.5	C2	30.68	C3	26.95	C1	25.81	C2	30.17	C3	26.88
spl.41	C1	25.32	C2	30.72	C3	26.99	C1	25.55	C2	31.07	C3	26.63	C1	25.67	C2	30.58	C3	26.78	C1	25.64	C2	30.66	C3	26.87	C1	25.79	C2	30.6	C3	26.49
spl.41	PR1	27.59	PR1	27.5	PR1	28.18	PR2	29.77	PR2	30.04	PR2	30.12	PR3	31.02	PR3	31.56	PR3	31.62	PC1	22.94	PC1	23.39	PC1	23.77	PC2	27.04	PC2	26.49	PC2	27.08
spl.41	PR1	27.43	PR1	27.76	PR1	28.14	PR2	29.62	PR2	30.3	PR2	30.24	PR3	30.9	PR3	31.41	PR3	31.88	PC1	22.95	PC1	23.41	PC1	23.75	PC2	26.88	PC2	26.41	PC2	27.48
spl.41	PR1	27.36	PR1	27.7	PR1	28.16	PR2	29.54	PR2	30.37	PR2	30.16	PR3	30.91	PR3	31.37	PR3	31.63	PC1	22.99	PC1	23.41	PC1	23.7	PC2	26.85	PC2	27.13	PC2	27.04
spl.42	C1	27.43	C2	32.58	C3	29.13	C1	27.94	C2	32.35	C3	29.46	C1	27.89	C2	32.37	C3	29.12	C1	27.43	C2	32.01	C3	29.2	C1	27.63	C2	31.82	C3	28.85
spl.42	C1	27.47	C2	32.24	C3	29.09	C1	27.73	C2	32.48	C3	29.3	C1	27.71	C2	32.6	C3	28.96	C1	27.32	C2	32.03	C3	28.88	C1	27.79	C2	31.73	C3	28.53
spl.42	C1	27.49	C2	32.42	C3	29.12	C1	27.84	C2	32.4	C3	29.25	C1	27.84	C2	32.27	C3	28.98	C1	27.4	C2	32	C3	28.87	C1	27.63	C2	32.48	C3	28.67
spl.42	PR1	28.87	PR1	29.2	PR1	29.41	PR2	31.14	PR2	31.35	PR2	31.64	PR3	32.1	PR3	32.56	PR3	32.99	PC1	23	PC1	23.35	PC1	23.91	PC2	27.28	PC2	27.68	PC2	27.56
spl.42	PR1	28.9	PR1	29.14	PR1	29.42	PR2	30.92	PR2	31.69	PR2	31.32	PR3	31.88	PR3	32.84	PR3	32.82	PC1	22.98	PC1	23.29	PC1	23.47	PC2	27.37	PC2	27.69	PC2	27.43
spl.42	PR1	29.07	PR1	29.23	PR1	29.45	PR2	31.25	PR2	31.42	PR2	31.27	PR3	32.05	PR3	32.42	PR3	32.81	PC1	23.12	PC1	23.38	PC1	23.78	PC2	27.39	PC2	27.66	PC2	27.5
spl.43	C1	26.39	C2	30.61	C3	28.12	C1	26.64	C2	30.76	C3	28.3	C1	26.56	C2	30.44	C3	27.93	C1	26.44	C2	30.44	C3	28.25	C1	26.9	C2	30.26	C3	27.8
spl.43	C1	26.26	C2	30.43	C3	27.94	C1	26.52	C2	30.63	C3	28.34	C1	26.56	C2	30.6	C3	28.19	C1	26.45	C2	30.55	C3	28.12	C1	26.76	C2	30.35	C3	27.84
spl.43	C1	26.41	C2	30.45	C3	28.07	C1	26.55	C2	31.02	C3	28.5	C1	26.57	C2	30.58	C3	28.21	C1	26.6	C2	30.44	C3	28.22	C1	26.89	C2	30.42	C3	28
spl.43	PR1	27.28	PR1	27.41	PR1	27.5	PR2	29.41	PR2	29.82	PR2	29.87	PR3	30.46	PR3	30.97	PR3	31.41	PC1	24.35	PC1	24.74	PC1	25.23	PC2	28.7	PC2	28.71	PC2	28.74
spl.43	PR1	27.05	PR1	27.41	PR1	27.52	PR2	29.33	PR2	29.8	PR2	29.91	PR3	30.39	PR3	31.25	PR3	31.47	PC1	24.23	PC1	24.67	PC1	25.02	PC2	28.41	PC2	28.68	PC2	28.78
spl.43	PR1	27.27	PR1	27.31	PR1	27.58	PR2	29.38	PR2	30.01	PR2	30.07	PR3	30.52	PR3	31.1	PR3	31.38	PC1	24.45	PC1	24.81	PC1	25.18	PC2	28.66	PC2	28.93	PC2	28.89
spl.44	C1	27.43	C2	31.72	C3	29.16	C1	27.63	C2	32.02	C3	29.54	C1	27.75	C2	31.95	C3	29.1	C1	27.02	C2	31.94	C3	28.91	C1	27.42	C2	31.77	C3	28.77
spl.44	C1	27.24	C2	31.69	C3	29.07	C1	27.61	C2	32.73	C3	29.46	C1	27.54	C2	32.04	C3	28.96	C1	27.01	C2	31.69	C3	28.91	C1	27.4	C2	31.7	C3	28.92
spl.44	C1	27.19	C2	31.82	C3	29.22	C1	27.74	C2	32.16	C3	29.45	C1	27.57	C2	31.99	C3	29.17	C1	27.09	C2	32	C3	28.93	C1	27.47	C2	31.8	C3	28.79
spl.44	PR1	28.72	PR1	28.68	PR1	29.01	PR2	31.47	PR2	31.4	PR2	31.92	PR3	32.56	PR3	33.13	PR3	33.29	PC1	22.37	PC1	22.76	PC1	23.17	PC2	26.9	PC2	27.24	PC2	27
spl.44	PR1	28.54	PR1	28.6	PR1	29.01	PR2	31.11	PR2	32.22	PR2	31.8	PR3	32.6	PR3	33.3	PR3	33.61	PC1	22.36	PC1	22.74	PC1	22.98	PC2	26.87	PC2	27.22	PC2	27.37
spl.44	PR1	28.55	PR1	28.71	PR1	29.12	PR2	31.57	PR2	32.17	PR2	31.88	PR3	32.37	PR3	33.13	PR3	33.82	PC1	22.38	PC1	23.05	PC1	22.97	PC2	26.97	PC2	27.16	PC2	27.07
spl.46	C1	24.9	C2	30.85	C3	27.62	C1	25.01	C2	30.74	C3	27.73	C1	25.64	C2	30.68	C3	27.39	C1	25.17	C2	30.58	C3	27.58	C1	25.33	C2	30.85	C3	27.66
spl.46	C1	24.89	C2	30.79	C3	27.4	C1	25.07	C2	31.23	C3	27.75	C1	25.14	C2	30.9	C3	27.86	C1	25.17	C2	30.76	C3	27.41	C1	25.43	C2	30.62	C3	27.58
spl.46	C1	24.86	C2	30.78	C3	27.55	C1	25.07	C2	31.12	C3	27.8	C1	25.18	C2	31.03	C3	27.48	C1	25.21	C2	30.74	C3	27.36	C1	25.37	C2	30.81	C3	27.3
spl.46	PR1	28.04	PR1	28.31	PR1	28.73	PR2	29.53	PR2	29.91	PR2	30.11	PR3	31.44	PR3	31.85	PR3	31.99	PC1	24.91	PC1	25.18	PC1	25.66	PC2	29.8	PC2	30.14	PC2	30.25
spl.46	PR1	28.02	PR1	28.38	PR1	28.37	PR2	29.62	PR2	30.37	PR2	30.26	PR3	31.28	PR3	31.56	PR3	32.39	PC1	25.02	PC1	25.51	PC1	25.68	PC2	29.63	PC2	29.8	PC2	30.17
spl.46	PR1	28.14	PR1	28.24	PR1	28.7	PR2	29.69	PR2	30.27	PR2	30.29	PR3	31.2	PR3	31.89	PR3	32.2	PC1	25.01	PC1	25.43	PC1	25.45	PC2	29.84	PC2	30.03	PC2	29.89
spl.47	C1	25.64	C2	30.95	C3	27.03	C1	25.89	C2	31.05	C3	26.98	C1	26.01	C2	31.2	C3	26.81	C1	25.7	C2	30.9	C3	26.7	C1	25.91	C2	30.62	C3	26.41
spl.47	C1	25.59	C2	31.08	C3	26.94	C1	26.05	C2	31.04	C3	27.2	C1	25.97	C2	31.05	C3	26.79	C1	25.7	C2	30.73	C3	26.64	C1	25.83	C2	30.49	C3	26.5
spl.47	C1	25.6	C2	30.78	C3	27.68	C1	26.07	C2	31.14	C3	27.14	C1	26.04	C2	30.97	C3	26.83	C1	25.61	C2	31	C3	26.76	C1	26.07	C2	30.69	C3	26.57
spl.47	PR1	27.27	PR1	27.51	PR1	27.93	PR2	28.84	PR2	29.57	PR2	29.32	PR3	30.55	PR3	31.45	PR3	31.22	PC1	22.13	PC1	22.71	PC1	22.78	PC2	26.08	PC2	26.47	PC2	26.33
spl.47	PR1	27.25	PR1	27.55	PR1	27.82	PR2	29.03	PR2	29.46	PR2	29.46	PR3	30.59	PR3	31.19	PR3	31.49	PC1	22.23	PC1	22.41	PC1	22.58	PC2	25.95	PC2	26.34	PC2	26.25
spl.47	PR1	27.24	PR1	27.58	PR1	28.6	PR2	29.02	PR2	29.53	PR2	29.49	PR3	30.55	PR3	31.21	PR3	31.37	PC1	22.26	PC1	22.66	PC1	22.85	PC2	26.23	PC2	26.54	PC2	26.45
spl.48	C1	26.13	C2	31.3	C3	28.07	C1	26.38	C2	31.22	C3	28.26	C1	26.54	C2	31.29	C3	28.09	C1	26.29	C2	31.12	C3	28.01	C1	26.8	C2	31.06	C3	27.6
spl.48	C1	26.3	C2	31.37	C3	28.33	C1	26.54	C2	31.55	C3	28.4	C1	26.63	C2	31.37	C3	28.22	C1	26.32	C2	31.53	C3	28.25	C1	26.54	C2	30.81	C3	27.78
spl.48	C1	26.36	C2	31.42	C3	28.13	C1	26.57	C2	31.75	C3	28.62	C1	26.57	C2	31.57	C3	28.26	C1	26.57	C2	31.38	C3	28.3	C1	26.82	C2	30.99	C3	27.83
spl.48	PR1	27.82	PR1	28.16	PR1	28.29	PR2	29.76	PR2	29.99	PR2	30.13	PR3	30.84	PR3	31.31	PR3	31.74	PC1	23.5	PC1	23.82	PC1	24.09	PC2	27.76	PC2	28.02	PC2	27.82
spl.48	PR1	27.93	PR1	28.22	PR1	28.42	PR2	29.5	PR2	30.11	PR2	30.04	PR3	30.75	PR3	31.61	PR3	31.78	PC1	23.53	PC1	23.92	PC1	24.16	PC2	27.52	PC2	27.95	PC2	27.82
spl.48	PR1	27.81	PR1	28.39	PR1	28.29	PR2	29.64	PR2	30.24	PR2	30.29	PR3	30.81	PR3	31.56	PR3	31.8	PC1	23.81	PC1	23.94	PC1	24.28	PC2	27.82	PC2	27.98	PC2	27.88
spl.49	C1	26.4	C2	31.72	C3	28.67	C1	26.73	C2	31.63	C3	29.01	C1	26.67	C2	31.43	C3	28.67	C1	26.71	C2	31.59	C3	28.93	C1	27	C2	31.71	C3	28.52
spl.49	C1	26.45	C2	31.43	C3	28.6	C1	26.8	C2	31.89	C3	28.89	C1	26.73	C2	31.95	C3	28.77	C1	26.66	C2	31.55	C3	28.41	C1	27.2	C2	31.64	C3	28.47
spl.49	C1	26.33	C2	31.71	C3	28.78	C1	26.69	C2	31.24	C3	28.97	C1	26.67	C2	31.65	C3	28.71	C1	26.82	C2	31.99	C3	28.65	C1	27.31	C2	31.8	C3	28.67
spl.49	PR1	27.01	PR1	27.36	PR1	27.51	PR2	28.87	PR2	29.16	PR2	29.39	PR3	30.07	PR3	30.8	PR3	30.84	PC1	25.65	PC1	26.1	PC1	26.36	PC2	29.91	PC2	30.08	PC2	29.96
spl.49	PR1	27.04	PR1	27.3	PR1	27.52	PR2	28.94	PR2	29.48	PR2	29.42	PR3	29.95	PR3	30.68	PR3	31.17	PC1	25.62	PC1	26.05	PC1	26.12	PC2	29.99	PC2	30.24	PC2	29.95
spl.49	PR1	26.98	PR1	27.33	PR1	27.56	PR2	28.8	PR2	29.22	PR2	29.27	PR3	30.09	PR3	31.13	PR3	31.06	PC1	25.68	PC1	26.31	PC1	26.16	PC2	30.02	PC2	30.17	PC2	30.14
spl.50	C1	25.33	C2	30.97	C3	27.61	C1	26.2	C2	31.15	C3	27.83	C1	25.7	C2	31.12	C3	27.5	C1	25.67	C2	30.78	C3	27.49	C1	26.11	C2	30.68	C3	27.13
spl.50	C1	25.08	C2	31.1	C3	27.66	C1	25.59	C2	31.35	C3	27.75	C1	25.88	C2	31.13	C3	27.4	C1	25.69	C2	31.21	C3	27.54	C1	26.08	C2	30.62	C3	27.09
spl.50	C1	25.13	C2	31.25	C3	27.26	C1	25.76	C2	31.29	C3	27.77	C1	25.8	C2	31.1	C3	27.5	C1	25.74	C2	30.67	C3	27.61	C1	25.93	C2	30.65	C3	27.13
spl.50	PR1	27.46	PR1	27.62	PR1	28.07	PR2	29.34	PR2	29.47	PR2	29.44	PR3	30.15	PR3	30.99	PR3	31.23	PC1	23.23	PC1	23.42	PC1	23.81	PC2	27.37	PC2	27.3	PC2	27.24
spl.50	PR1	27.09	PR1	27.87	PR1	27.98	PR2	28.96	PR2	29.62	PR2	29.49	PR3	30.29	PR3	31.12	PR3	30.99	PC1	23.22	PC1	23.71	PC1	23.94	PC2	27.33	PC2	27.36	PC2	27.3
spl.50	PR1	27.22	PR1	27.67	PR1	27.73	PR2	29	PR2	29.62	PR2	29.52	PR3	30.32	PR3	31	PR3	31.15	PC1	23.24	PC1	23.71	PC1	23.92	PC2	27.09	PC2	27.41	PC2	27.33
spl.51	C1	25.04	C2	30.61	C3	26.89	C1	25.2	C2	30.43	C3	26.92	C1	25.26	C2	30.31	C3	26.71	C1	25.22	C2	30.5	C3	26.93	C1	25.78	C2	30.35	C3	26.57
spl.51	C1	24.94	C2	30.62	C3	26.84	C1	25.3	C2	30.54	C3	26.86	C1	25.37	C2	30.44	C3	26.74	C1	25.3	C2	30.34	C3	26.74	C1	25.73	C2	30.37	C3	26.48
spl.51	C1	25.02	C2	30.29	C3	26.79	C1	25.23	C2	30.52	C3	27.05	C1	25.12	C2	30.45	C3	26.7	C1	25.3	C2	30.52	C3	26.76	C1	25.53	C2	30.42	C3	26.51
spl.51	PR1	27.52	PR1	27.76	PR1	28.12	PR2	28.86	PR2	29.26	PR2	29.25	PR3	30.3	PR3	30.87	PR3	31.19	PC1	23.65	PC1	24.37	PC1	24.45	PC2	28.42	PC2	28.49	PC2	28.4
spl.51	PR1	27.42	PR1	27.81	PR1	27.95	PR2	28.94	PR2	29.3	PR2	29.24	PR3	30.25	PR3	31.04	PR3	31.3	PC1	23.67	PC1	24.14	PC1	24.31	PC2	28.31	PC2	28.56	PC2	28.31
spl.51	PR1	27.49	PR1	27.72	PR1	28.08	PR2	28.89	PR2	29.25	PR2	29.58	PR3	30.24	PR3	30.96	PR3	31.2	PC1	23.64	PC1	24.17	PC1	24.41	PC2	28.13	PC2	28.62	PC2	28.33
spl.53	C1	26.16	C2	31.15	C3	27.99	C1	26.49	C2	31.3	C3	28.38	C1	26.42	C2	31.34	C3	27.91	C1	26.53	C2	31.02	C3	28.14	C1	26.73	C2	31.03	C3	27.69
spl.53	C1	26.13	C2	31.15	C3	28.01	C1	26.43	C2	31.41	C3	28.16	C1	26.45	C2	31.3	C3	27.8	C1	26.43	C2	31.24	C3	27.82	C1	26.65	C2	31.23	C3	27.66
spl.53	C1	26.3	C2	31.34	C3	28.05	C1	26.45	C2	31.36	C3	28.3	C1	26.57	C2	31.31	C3	27.95	C1	26.3	C2	31.45	C3	27.85	C1	26.68	C2	30.98	C3	27.62
spl.53	PR1	27.98	PR1	28.1	PR1	28.33	PR2	29.55	PR2	30.06	PR2	30.13	PR3	30.97	PR3	31.5	PR3	31.75	PC1	24.37	PC1	24.68	PC1	25.17	PC2	28.5	PC2	28.75	PC2	28.63
spl.53	PR1	28.01	PR1	28.08	PR1	28.32	PR2	29.72	PR2	29.9	PR2	29.94	PR3	30.97	PR3	31.72	PR3	31.73	PC1	24.27	PC1	24.52	PC1	24.67	PC2	28.36	PC2	28.67	PC2	28.5
spl.53	PR1	28.16	PR1	28.39	PR1	28.68	PR2	29.76	PR2	30.1	PR2	30.14	PR3	31.11	PR3	31.52	PR3	31.75	PC1	24.32	PC1	24.94	PC1	25	PC2	28.55	PC2	28.74	PC2	28.57
spl.55	C1	24.54	C2	29.87	C3	26.57	C1	24.8	C2	30.33	C3	26.74	C1	24.92	C2	29.84	C3	26.45	C1	24.38	C2	29.73	C3	26.49	C1	24.68	C2	29.58	C3	25.66
spl.55	C1	24.41	C2	30.04	C3	26.8	C1	24.77	C2	30.14	C3	26.71	C1	25.08	C2	29.93	C3	26.77	C1	24.43	C2	29.5	C3	26.38	C1	24.8	C2	29.6	C3	25.81
spl.55	C1	24.4	C2	29.68	C3	26.75	C1	24.68	C2	30.18	C3	26.71	C1	24.85	C2	29.91	C3	26.56	C1	24.46	C2	29.7	C3	26.27	C1	24.61	C2	29.59	C3	25.6
spl.55	PR1	26.59	PR1	26.78	PR1	27.14	PR2	27.89	PR2	28.58	PR2	28.37	PR3	29.56	PR3	30.13	PR3	30.35	PC1	20.57	PC1	21.03	PC1	21.49	PC2	24.66	PC2	24.97	PC2	24.9
spl.55	PR1	26.56	PR1	26.87	PR1	27.36	PR2	27.99	PR2	28.45	PR2	28.33	PR3	29.8	PR3	30.05	PR3	30.64	PC1	20.63	PC1	20.98	PC1	21.5	PC2	24.78	PC2	24.97	PC2	24.81
spl.55	PR1	26.52	PR1	26.64	PR1	27.24	PR2	27.94	PR2	28.66	PR2	28.52	PR3	29.38	PR3	30.19	PR3	30.35	PC1	20.67	PC1	21.1	PC1	21.26	PC2	24.55	PC2	25	PC2	24.9
spl.57	C1	26.76	C2	32.18	C3	28.7	C1	27.08	C2	32.27	C3	28.83	C1	27.03	C2	32.26	C3	28.69	C1	26.63	C2	32.02	C3	28.61	C1	26.96	C2	31.81	C3	28.28
spl.57	C1	26.79	C2	32.05	C3	28.82	C1	27.05	C2	32.19	C3	29.02	C1	27.18	C2	32.33	C3	28.69	C1	26.63	C2	32.18	C3	28.63	C1	27.15	C2	31.89	C3	28.22
spl.57	C1	26.75	C2	32.09	C3	28.69	C1	27.08	C2	32.38	C3	28.95	C1	27.15	C2	32.04	C3	28.7	C1	26.67	C2	32.34	C3	28.64	C1	27.16	C2	32.05	C3	28.27
spl.57	PR1	28.11	PR1	28.24	PR1	28.47	PR2	29.82	PR2	30.26	PR2	30.18	PR3	31.06	PR3	31.95	PR3	32.04	PC1	22.9	PC1	23.22	PC1	23.45	PC2	27.49	PC2	27.95	PC2	27.85
spl.57	PR1	27.94	PR1	28.39	PR1	28.53	PR2	29.74	PR2	30.13	PR2	30.39	PR3	31.17	PR3	31.57	PR3	31.94	PC1	22.74	PC1	23.38	PC1	23.58	PC2	27.58	PC2	27.91	PC2	27.74
spl.57	PR1	28	PR1	28.5	PR1	28.61	PR2	29.92	PR2	30.44	PR2	30.61	PR3	31.17	PR3	31.93	PR3	32.08	PC1	22.95	PC1	23.5	PC1	23.8	PC2	27.67	PC2	28.11	PC2	27.84
spl.58	C1	27.69	C2	32.56	C3	28.86	C1	27.96	C2	32.61	C3	29.31	C1	27.99	C2	32.36	C3	28.74	C1	27.87	C2	32.16	C3	29.05	C1	28.25	C2	32.46	C3	28.77
spl.58	C1	27.71	C2	32.32	C3	28.92	C1	27.83	C2	32.54	C3	29.01	C1	27.94	C2	32.3	C3	28.73	C1	27.98	C2	32.47	C3	28.98	C1	28.27	C2	32.62	C3	28.96
spl.58	C1	27.77	C2	32.32	C3	28.97	C1	28.13	C2	32.32	C3	29.16	C1	28.03	C2	32.61	C3	28.97	C1	27.96	C2	32.31	C3	29.01	C1	28.44	C2	32.57	C3	28.88
spl.58	PR1	28.08	PR1	28.33	PR1	28.41	PR2	30	PR2	30.49	PR2	30.81	PR3	31.38	PR3	31.75	PR3	32.07	PC1	25.87	PC1	26.04	PC1	26.53	PC2	30.83	PC2	31.05	PC2	31.09
spl.58	PR1	28.02	PR1	28.23	PR1	28.54	PR2	30.09	PR2	30.46	PR2	30.62	PR3	31.35	PR3	31.89	PR3	32.03	PC1	25.81	PC1	25.98	PC1	26.54	PC2	31.1	PC2	31.35	PC2	31.35
spl.58	PR1	28.08	PR1	28.17	PR1	28.48	PR2	30.16	PR2	30.49	PR2	30.6	PR3	31.44	PR3	32.11	PR3	32.33	PC1	25.83	PC1	25.95	PC1	26.37	PC2	31.1	PC2	31.15	PC2	31.12
spl.59	C1	27.56	C2	32.23	C3	29.27	C1	27.64	C2	32.28	C3	29.32	C1	27.87	C2	32.61	C3	29.14	C1	27.34	C2	32.4	C3	28.98	C1	27.84	C2	32.37	C3	28.69
spl.59	C1	27.44	C2	32.47	C3	29.18	C1	27.65	C2	32.24	C3	29.25	C1	27.81	C2	32.29	C3	28.99	C1	27.37	C2	32.41	C3	29.01	C1	27.75	C2	32.3	C3	28.58
spl.59	C1	27.54	C2	32.84	C3	29.14	C1	27.79	C2	32.57	C3	29.46	C1	27.77	C2	32.49	C3	28.9	C1	27.4	C2	32.69	C3	29.18	C1	27.91	C2	32.36	C3	28.76
spl.59	PR1	28.77	PR1	28.97	PR1	29.35	PR2	30.4	PR2	30.98	PR2	31.08	PR3	31.76	PR3	32.22	PR3	32.78	PC1	23.72	PC1	24.16	PC1	24.43	PC2	28.05	PC2	28.42	PC2	28.07
spl.59	PR1	28.73	PR1	28.93	PR1	29.17	PR2	30.79	PR2	30.85	PR2	30.84	PR3	31.83	PR3	32.46	PR3	32.63	PC1	23.71	PC1	24.03	PC1	24.35	PC2	27.97	PC2	28.19	PC2	28.01
spl.59	PR1	28.8	PR1	29.3	PR1	29.23	PR2	30.77	PR2	31.09	PR2	31.27	PR3	31.9	PR3	32.6	PR3	32.44	PC1	23.61	PC1	24.33	PC1	24.48	PC2	28.16	PC2	28.4	PC2	28.23
spl.60	C1	25.86	C2	30.85	C3	27.14	C1	26.22	C2	31.13	C3	27.4	C1	26.15	C2	31.43	C3	27.16	C1	26.29	C2	31.21	C3	27.48	C1	26.47	C2	31.06	C3	27.14
spl.60	C1	26.04	C2	31.03	C3	27.4	C1	26.26	C2	31.26	C3	27.43	C1	26.21	C2	31.26	C3	27.33	C1	26.39	C2	31.5	C3	27.5	C1	26.61	C2	31.21	C3	27.31
spl.60	C1	25.88	C2	31.22	C3	27.63	C1	26.18	C2	31.39	C3	27.58	C1	26.32	C2	31.07	C3	27.29	C1	26.31	C2	31.79	C3	27.55	C1	26.44	C2	31.45	C3	27.31
spl.60	PR1	26.5	PR1	26.65	PR1	26.84	PR2	28.08	PR2	28.32	PR2	28.43	PR3	29.73	PR3	30.26	PR3	30.49	PC1	26.19	PC1	26.52	PC1	26.95	PC2	30.33	PC2	30.46	PC2	30.37
spl.60	PR1	26.52	PR1	26.75	PR1	26.97	PR2	27.97	PR2	28.45	PR2	28.42	PR3	29.71	PR3	30.31	PR3	30.61	PC1	26.34	PC1	27.05	PC1	27.09	PC2	30.45	PC2	30.65	PC2	30.42
spl.60	PR1	26.49	PR1	26.7	PR1	27.11	PR2	27.91	PR2	28.5	PR2	28.36	PR3	29.77	PR3	30.57	PR3	30.46	PC1	26.23	PC1	27.24	PC1	26.98	PC2	30.28	PC2	30.73	PC2	30.38
spl.61	C1	25.3	C2	31.16	C3	27.17	C1	25.55	C2	30.95	C3	27.54	C1	25.7	C2	31.28	C3	27.07	C1	25.29	C2	30.85	C3	26.9	C1	25.78	C2	30.69	C3	26.61
spl.61	C1	25.23	C2	31.1	C3	27.25	C1	25.52	C2	30.89	C3	27.36	C1	25.58	C2	31.26	C3	27.18	C1	25.33	C2	31.12	C3	27.09	C1	25.72	C2	30.58	C3	26.83
spl.61	C1	25.18	C2	31.18	C3	27.39	C1	25.67	C2	31.39	C3	27.68	C1	25.51	C2	31.23	C3	27.25	C1	25.07	C2	31.31	C3	27.09	C1	25.62	C2	30.71	C3	27.07
spl.61	PR1	27.01	PR1	27.26	PR1	27.45	PR2	28.61	PR2	28.96	PR2	29.15	PR3	30.38	PR3	31.06	PR3	31.13	PC1	21.18	PC1	21.43	PC1	21.74	PC2	26.06	PC2	26.05	PC2	25.88
spl.61	PR1	27	PR1	27.35	PR1	27.47	PR2	28.41	PR2	28.76	PR2	28.97	PR3	30.44	PR3	31.26	PR3	31.04	PC1	21.22	PC1	21.71	PC1	21.82	PC2	25.89	PC2	26.02	PC2	25.96
spl.61	PR1	26.95	PR1	27.25	PR1	27.44	PR2	28.73	PR2	29.16	PR2	29.23	PR3	30.25	PR3	30.99	PR3	31	PC1	21.11	PC1	21.99	PC1	21.56	PC2	25.82	PC2	26.05	PC2	26
spl.62	C1	26.91	C2	32.08	C3	28.25	C1	27.35	C2	32.14	C3	28.53	C1	27.28	C2	32.43	C3	28.22	C1	26.81	C2	32.03	C3	28.1	C1	27.4	C2	31.83	C3	28.02
spl.62	C1	27.11	C2	32.33	C3	28.53	C1	27.34	C2	32.12	C3	28.78	C1	27.34	C2	32.32	C3	28.26	C1	26.84	C2	31.98	C3	28.35	C1	27.52	C2	32.04	C3	28.01
spl.62	C1	27	C2	31.9	C3	28.72	C1	27.33	C2	32.19	C3	28.81	C1	27.24	C2	32.3	C3	28.46	C1	26.78	C2	32.07	C3	28.5	C1	27.28	C2	31.84	C3	28.24
spl.62	PR1	28.14	PR1	28.33	PR1	28.45	PR2	30.41	PR2	30.74	PR2	30.8	PR3	31.29	PR3	32.09	PR3	31.97	PC1	22.74	PC1	23.24	PC1	23.3	PC2	28.12	PC2	28.47	PC2	28.15
spl.62	PR1	28.08	PR1	28.41	PR1	28.56	PR2	30.44	PR2	30.72	PR2	30.89	PR3	31.15	PR3	32.02	PR3	32.06	PC1	22.64	PC1	23.15	PC1	23.47	PC2	28.22	PC2	28.32	PC2	28.1
spl.62	PR1	28.11	PR1	28.31	PR1	28.53	PR2	30.45	PR2	30.71	PR2	30.79	PR3	31.29	PR3	32.08	PR3	31.96	PC1	22.64	PC1	23.05	PC1	23.41	PC2	27.96	PC2	28.44	PC2	28.13
spl.63	C1	26.46	C2	31.53	C3	28.67	C1	26.58	C2	31.46	C3	28.98	C1	26.61	C2	31.38	C3	28.63	C1	26.26	C2	31.18	C3	28.53	C1	26.71	C2	31.37	C3	28.28
spl.63	C1	26.32	C2	31.21	C3	28.75	C1	26.38	C2	31.49	C3	28.93	C1	26.64	C2	31.57	C3	28.61	C1	26.26	C2	31.32	C3	28.8	C1	26.95	C2	31.4	C3	28.48
spl.63	C1	26.03	C2	31.46	C3	28.91	C1	26.58	C2	31.58	C3	29.24	C1	26.55	C2	31.37	C3	29	C1	26.32	C2	31.56	C3	28.85	C1	26.86	C2	31.3	C3	28.62
spl.63	PR1	27.84	PR1	27.96	PR1	28.08	PR2	29.57	PR2	29.62	PR2	30.07	PR3	31.04	PR3	31.53	PR3	31.82	PC1	23.63	PC1	23.86	PC1	24.31	PC2	28.24	PC2	28.54	PC2	28.36
spl.63	PR1	27.72	PR1	27.48	PR1	28.12	PR2	29.53	PR2	29.83	PR2	29.96	PR3	31.12	PR3	31.53	PR3	31.91	PC1	23.67	PC1	24.04	PC1	24.68	PC2	28.37	PC2	28.65	PC2	28.47
spl.63	PR1	28.07	PR1	27.73	PR1	27.98	PR2	29.62	PR2	29.77	PR2	30.25	PR3	30.96	PR3	31.54	PR3	32.04	PC1	23.74	PC1	24.03	PC1	24.36	PC2	28.38	PC2	28.54	PC2	28.42
spl.64	C1	25.18	C2	30.04	C3	27.35	C1	25.4	C2	30.22	C3	27.6	C1	25.76	C2	30.39	C3	27.56	C1	25.07	C2	30.41	C3	27.17	C1	25.12	C2	30.1	C3	26.95
spl.64	C1	25.32	C2	30.47	C3	27.51	C1	25.5	C2	30.69	C3	27.82	C1	25.78	C2	30.19	C3	27.65	C1	25.15	C2	30.52	C3	27.24	C1	25.36	C2	30.5	C3	27.16
spl.64	C1	25.21	C2	30.24	C3	27.71	C1	25.46	C2	30.51	C3	27.91	C1	26.05	C2	30.42	C3	27.79	C1	24.93	C2	29.93	C3	27.47	C1	25.32	C2	30.07	C3	27.29
spl.64	PR1	26.11	PR1	26.24	PR1	26.34	PR2	27.85	PR2	28.07	PR2	28.18	PR3	29.99	PR3	29.95	PR3	30.47	PC1	20.71	PC1	21.16	PC1	21.26	PC2	24.91	PC2	25.26	PC2	25.25
spl.64	PR1	26.26	PR1	26.41	PR1	26.51	PR2	28.01	PR2	28.32	PR2	28.32	PR3	30.12	PR3	30.07	PR3	30.48	PC1	20.64	PC1	21.1	PC1	21.12	PC2	25.13	PC2	25.59	PC2	25.23
spl.64	PR1	26.26	PR1	26.16	PR1	26.48	PR2	27.89	PR2	28.24	PR2	28.25	PR3	30.21	PR3	30.13	PR3	30.47	PC1	20.53	PC1	20.74	PC1	21.23	PC2	25.08	PC2	25.42	PC2	25.28
spl.65	C1	27.83	C2	33.21	C3	28.74	C1	28.33	C2	32.45	C3	29.03	C1	28.15	C2	32.56	C3	28.73	C1	27.46	C2	32.48	C3	28.63	C1	28.09	C2	32.21	C3	28.25
spl.65	C1	27.72	C2	32.42	C3	28.84	C1	28.31	C2	32.87	C3	28.98	C1	28.12	C2	32.71	C3	28.87	C1	27.67	C2	32.43	C3	28.74	C1	27.84	C2	32.51	C3	28.31
spl.65	C1	27.82	C2	32.78	C3	29.04	C1	28.17	C2	32.99	C3	29.21	C1	28.12	C2	32.75	C3	28.79	C1	27.83	C2	32.93	C3	28.73	C1	27.91	C2	32.26	C3	28.66
spl.65	PR1	28.58	PR1	28.67	PR1	29.02	PR2	30.37	PR2	30.57	PR2	30.99	PR3	31.77	PR3	32.35	PR3	32.74	PC1	23.03	PC1	23.64	PC1	23.86	PC2	27.55	PC2	27.72	PC2	27.66
spl.65	PR1	28.75	PR1	28.6	PR1	28.91	PR2	30.63	PR2	30.93	PR2	30.95	PR3	31.81	PR3	32.3	PR3	32.58	PC1	23.22	PC1	23.52	PC1	23.96	PC2	27.4	PC2	27.76	PC2	27.66
spl.65	PR1	28.53	PR1	28.68	PR1	28.99	PR2	30.69	PR2	30.65	PR2	30.93	PR3	31.76	PR3	32.34	PR3	32.34	PC1	23.19	PC1	23.72	PC1	23.83	PC2	27.37	PC2	27.83	PC2	27.69
spl.66	C1	27.26	C2	32.74	C3	29.22	C1	27.24	C2	32.13	C3	29.44	C1	27.42	C2	32.42	C3	29.33	C1	27.05	C2	32.28	C3	29.68	C1	27.05	C2	32.02	C3	29.78
spl.66	C1	27.23	C2	32.12	C3	29	C1	27.23	C2	32.13	C3	29.18	C1	27.24	C2	32.25	C3	29.17	C1	27.2	C2	32.14	C3	29.46	C1	27.02	C2	32.05	C3	29.64
spl.66	C1	27.37	C2	32.27	C3	29.14	C1	27.35	C2	32.09	C3	29.1	C1	27.42	C2	32.26	C3	29.09	C1	27.08	C2	32.14	C3	29.47	C1	27.14	C2	31.86	C3	29.39
spl.66	PR1	28.94	PR1	29.33	PR1	28.92	PR2	30.49	PR2	30.59	PR2	30.7	PR3	32.61	PR3	32.98	PR3	32.76	PC1	23.43	PC1	23.76	PC1	23.58	PC2	27.57	PC2	27.99	PC2	27.96
spl.66	PR1	28.89	PR1	29.01	PR1	28.81	PR2	30.61	PR2	30.39	PR2	30.57	PR3	32.85	PR3	33.01	PR3	32.97	PC1	23.65	PC1	23.8	PC1	23.64	PC2	27.57	PC2	27.96	PC2	27.98
spl.66	PR1	28.93	PR1	29	PR1	29.02	PR2	30.43	PR2	30.59	PR2	30.64	PR3	32.75	PR3	32.84	PR3	33.05	PC1	23.49	PC1	23.66	PC1	23.76	PC2	27.68	PC2	27.82	PC2	27.88
spl.67	C1	26.42	C2	30.31	C3	26.89	C1	26.56	C2	30.72	C3	26.86	C1	26.52	C2	30.46	C3	27.02	C1	26.33	C2	30.57	C3	27.28	C1	26.46	C2	30.46	C3	27.2
spl.67	C1	26.43	C2	30.39	C3	26.56	C1	26.53	C2	30.66	C3	26.64	C1	26.54	C2	30.59	C3	26.74	C1	26.38	C2	30.67	C3	27.1	C1	26.44	C2	30.41	C3	27.17
spl.67	C1	26.51	C2	30.62	C3	26.49	C1	26.57	C2	30.57	C3	26.57	C1	26.6	C2	30.58	C3	26.74	C1	26.34	C2	30.71	C3	27.02	C1	26.53	C2	30.58	C3	26.98
spl.67	PR1	25.42	PR1	25.33	PR1	25.53	PR2	27.42	PR2	27.38	PR2	27.37	PR3	29.08	PR3	29.26	PR3	29.43	PC1	23.56	PC1	23.69	PC1	23.75	PC2	27.5	PC2	27.68	PC2	27.8
spl.67	PR1	25.46	PR1	25.41	PR1	25.45	PR2	27.48	PR2	27.52	PR2	27.4	PR3	29.01	PR3	29.34	PR3	29.29	PC1	23.63	PC1	23.78	PC1	23.75	PC2	27.46	PC2	27.72	PC2	27.93
spl.67	PR1	25.47	PR1	25.41	PR1	25.44	PR2	27.47	PR2	27.47	PR2	27.47	PR3	29.16	PR3	29.21	PR3	29.35	PC1	23.62	PC1	23.83	PC1	23.64	PC2	27.49	PC2	27.75	PC2	27.84
spl.68	C1	25.82	C2	29.97	C3	26.74	C1	25.85	C2	30.1	C3	26.85	C1	25.73	C2	30.17	C3	26.8	C1	25.29	C2	30.15	C3	27.21	C1	25.64	C2	29.64	C3	26.79
spl.68	C1	25.88	C2	30.48	C3	26.52	C1	25.95	C2	29.92	C3	26.68	C1	25.87	C2	30.25	C3	26.59	C1	25.34	C2	30.25	C3	27.02	C1	25.5	C2	29.71	C3	26.92
spl.68	C1	25.71	C2	29.92	C3	26.4	C1	25.61	C2	30.16	C3	26.51	C1	25.68	C2	30.13	C3	26.54	C1	25.31	C2	30.21	C3	26.75	C1	25.38	C2	29.73	C3	26.23
spl.68	PR1	26.67	PR1	26.46	PR1	26.57	PR2	27.86	PR2	27.87	PR2	27.93	PR3	29.82	PR3	30.04	PR3	30	PC1	21.18	PC1	21.49	PC1	21.36	PC2	25.49	PC2	25.44	PC2	25.45
spl.68	PR1	26.61	PR1	26.85	PR1	26.45	PR2	27.93	PR2	27.73	PR2	28	PR3	29.95	PR3	29.99	PR3	30.04	PC1	21.14	PC1	21.46	PC1	21.32	PC2	25.19	PC2	25.33	PC2	25.38
spl.68	PR1	26.52	PR1	26.43	PR1	26.54	PR2	27.82	PR2	27.91	PR2	27.94	PR3	29.86	PR3	30.05	PR3	29.9	PC1	21.2	PC1	21.48	PC1	21.29	PC2	25.07	PC2	25.38	PC2	25.27
spl.69	C1	25.93	C2	31.28	C3	26.9	C1	26.04	C2	31.01	C3	27.13	C1	26.09	C2	31.25	C3	26.93	C1	26.09	C2	30.89	C3	27.32	C1	26.02	C2	30.81	C3	27.52
spl.69	C1	26.16	C2	31.04	C3	26.79	C1	26.14	C2	31	C3	26.81	C1	26.29	C2	31.07	C3	26.88	C1	26.15	C2	31.27	C3	27.22	C1	26.33	C2	31.13	C3	27.18
spl.69	C1	26.32	C2	30.96	C3	26.75	C1	26.19	C2	31.13	C3	26.78	C1	26.32	C2	31.17	C3	26.68	C1	26.22	C2	31.31	C3	27.19	C1	26.34	C2	30.99	C3	27.14
spl.69	PR1	27.46	PR1	27.56	PR1	27.58	PR2	29.27	PR2	29.24	PR2	29.27	PR3	30.72	PR3	30.93	PR3	30.75	PC1	25.24	PC1	25.45	PC1	25.44	PC2	29.44	PC2	29.33	PC2	29.47
spl.69	PR1	27.65	PR1	27.46	PR1	27.64	PR2	29.35	PR2	29.39	PR2	29.18	PR3	30.88	PR3	30.88	PR3	30.9	PC1	25.33	PC1	25.61	PC1	25.49	PC2	29.24	PC2	29.41	PC2	29.3
spl.69	PR1	27.63	PR1	27.62	PR1	27.6	PR2	29.23	PR2	29.25	PR2	29.33	PR3	30.96	PR3	31.08	PR3	30.86	PC1	25.37	PC1	25.57	PC1	25.49	PC2	29.23	PC2	29.38	PC2	29.45
spl.70	C1	25.95	C2	30.29	C3	26.37	C1	26.01	C2	30.54	C3	26.37	C1	25.03	C2	30.5	C3	26.54	C1	25.66	C2	30.48	C3	26.76	C1	26	C2	30.34	C3	26.69
spl.70	C1	25.74	C2	30.49	C3	26.15	C1	25.86	C2	30.42	C3	26.17	C1	25.96	C2	30.49	C3	26.31	C1	25.65	C2	30.58	C3	26.68	C1	25.71	C2	30.16	C3	26.51
spl.70	C1	25.78	C2	30.47	C3	26.1	C1	25.83	C2	30.66	C3	26.06	C1	26.03	C2	30.57	C3	26.22	C1	25.61	C2	30.67	C3	26.54	C1	25.75	C2	30.38	C3	26.43
spl.70	PR1	26.51	PR1	26.37	PR1	26.39	PR2	27.57	PR2	27.64	PR2	27.57	PR3	28.15	PR3	29.67	PR3	29.79	PC1	23.8	PC1	23.96	PC1	23.92	PC2	26.78	PC2	27.84	PC2	27.93
spl.70	PR1	26.08	PR1	26.07	PR1	26.17	PR2	27.53	PR2	27.6	PR2	27.57	PR3	29.53	PR3	29.66	PR3	29.68	PC1	23.55	PC1	23.72	PC1	23.8	PC2	27.59	PC2	27.64	PC2	27.81
spl.70	PR1	26.18	PR1	26.1	PR1	26.12	PR2	27.6	PR2	27.61	PR2	27.54	PR3	29.68	PR3	29.72	PR3	29.7	PC1	23.63	PC1	23.74	PC1	23.69	PC2	27.48	PC2	27.76	PC2	27.79
spl.71	C1	27.3	C2	31.15	C3	28.16	C1	27.17	C2	31.07	C3	27.68	C1	26.72	C2	30.95	C3	27.84	C1	25.32	C2	31.37	C3	28.1	C1	26.5	C2	30.71	C3	28.27
spl.71	C1	26.62	C2	31.2	C3	27.44	C1	26.72	C2	31.11	C3	27.41	C1	26.71	C2	31.46	C3	27.43	C1	26.3	C2	30.81	C3	27.66	C1	26.46	C2	31.01	C3	29.49
spl.71	C1	26.55	C2	31.07	C3	27.28	C1	26.59	C2	31.81	C3	27.41	C1	26.66	C2	31.24	C3	27.43	C1	26.18	C2	30.76	C3	27.64	C1	26.55	C2	31.08	C3	29.12
spl.71	PR1	28.52	PR1	28.28	PR1	28.66	PR2	30.53	PR2	30.12	PR2	30.22	PR3	31.36	PR3	31.64	PR3	31.62	PC1	22.42	PC1	23.8	PC1	22.57	PC2	27.28	PC2	27.54	PC2	27.64
spl.71	PR1	28.31	PR1	28.25	PR1	28.32	PR2	30.28	PR2	30.05	PR2	30.24	PR3	31.34	PR3	31.88	PR3	31.48	PC1	23.04	PC1	23.26	PC1	23.23	PC2	27.29	PC2	27.27	PC2	27.53
spl.71	PR1	28.14	PR1	28.35	PR1	28.24	PR2	30.07	PR2	30.41	PR2	30.19	PR3	31.35	PR3	31.49	PR3	31.45	PC1	22.97	PC1	23.14	PC1	23.24	PC2	27.3	PC2	27.26	PC2	27.47
spl.72	C1	24.88	C2	29.71	C3	26.59	C1	24.78	C2	29.53	C3	26.55	C1	25.03	C2	29.64	C3	26.7	C1	24.79	C2	29.23	C3	26.85	C1	24.7	C2	28.63	C3	26.51
spl.72	C1	24.86	C2	29.52	C3	26.59	C1	24.89	C2	29.53	C3	26.61	C1	25.39	C2	29.58	C3	26.4	C1	24.74	C2	29.45	C3	26.89	C1	24.76	C2	29.27	C3	26.68
spl.72	C1	24.93	C2	29.59	C3	26.42	C1	24.79	C2	29.51	C3	26.56	C1	25.09	C2	29.56	C3	26.43	C1	24.56	C2	29.27	C3	26.78	C1	24.82	C2	29.09	C3	26.47
spl.72	PR1	27.3	PR1	27.26	PR1	27.27	PR2	28.46	PR2	28.39	PR2	28.5	PR3	30.66	PR3	30.53	PR3	30.63	PC1	22.64	PC1	22.56	PC1	22.78	PC2	26.67	PC2	26.53	PC2	26.77
spl.72	PR1	27.27	PR1	27.2	PR1	27.27	PR2	28.56	PR2	28.4	PR2	28.64	PR3	30.81	PR3	30.57	PR3	30.59	PC1	22.62	PC1	22.74	PC1	22.74	PC2	26.75	PC2	26.99	PC2	27.08
spl.72	PR1	27.35	PR1	27.29	PR1	27.24	PR2	28.47	PR2	28.48	PR2	28.51	PR3	30.52	PR3	30.35	PR3	30.62	PC1	22.57	PC1	22.66	PC1	22.8	PC2	26.84	PC2	26.89	PC2	26.87
spl.73	C1	25.88	C2	30.67	C3	27.36	C1	26.13	C2	30.7	C3	27.37	C1	26.14	C2	31.35	C3	27.51	C1	25.73	C2	30.85	C3	27.78	C1	25.72	C2	30.53	C3	31.31
spl.73	C1	26.33	C2	30.48	C3	27.39	C1	26.1	C2	30.71	C3	27.59	C1	26.15	C2	30.81	C3	27.44	C1	26.17	C2	30.64	C3	27.64	C1	25.68	C2	30.12	C3	31.21
spl.73	C1	26.2	C2	31.24	C3	27.37	C1	25.97	C2	30.55	C3	27.61	C1	26.66	C2	30.89	C3	27.37	C1	25.77	C2	30.72	C3	27.59	C1	25.87	C2	30.25	C3	31.28
spl.73	PR1	27.64	PR1	27.87	PR1	27.84	PR2	29.38	PR2	29.22	PR2	29.22	PR3	30.84	PR3	31.23	PR3	31.15	PC1	21.79	PC1	22.28	PC1	21.98	PC2	25.33	PC2	25.75	PC2	25.43
spl.73	PR1	28.01	PR1	27.85	PR1	27.78	PR2	29.4	PR2	29.24	PR2	29.41	PR3	30.99	PR3	31.44	PR3	31.2	PC1	22.28	PC1	21.93	PC1	21.94	PC2	25.2	PC2	25.51	PC2	25.45
spl.73	PR1	27.97	PR1	28.13	PR1	27.89	PR2	29.16	PR2	29.06	PR2	29.54	PR3	31.57	PR3	31.41	PR3	31.12	PC1	21.82	PC1	21.99	PC1	22.03	PC2	25.47	PC2	25.59	PC2	25.43
spl.74	C1	26.9	C2	30.81	C3	27.66	C1	26.96	C2	30.98	C3	27.78	C1	27.54	C2	31.09	C3	29.63	C1	26.87	C2	31.02	C3	28.25	C1	27.05	C2	30.94	C3	28.25
spl.74	C1	26.89	C2	31.03	C3	27.76	C1	27.04	C2	31.21	C3	27.86	C1	27.01	C2	31.53	C3	29.82	C1	26.85	C2	31.09	C3	28.29	C1	27.09	C2	30.88	C3	28.28
spl.74	C1	26.96	C2	30.98	C3	27.68	C1	26.95	C2	31.21	C3	27.53	C1	27.08	C2	31.12	C3	29.51	C1	26.77	C2	30.92	C3	28.15	C1	27.01	C2	30.74	C3	28.18
spl.74	PR1	27.63	PR1	27.62	PR1	27.71	PR2	29.61	PR2	29.64	PR2	29.84	PR3	31.57	PR3	31.15	PR3	31.17	PC1	25.13	PC1	25.39	PC1	25.39	PC2	29.3	PC2	29.66	PC2	29.74
spl.74	PR1	27.75	PR1	27.86	PR1	27.77	PR2	29.66	PR2	29.77	PR2	29.74	PR3	30.96	PR3	31.12	PR3	31.28	PC1	25.26	PC1	25.57	PC1	25.52	PC2	29.55	PC2	29.76	PC2	29.93
spl.74	PR1	27.79	PR1	27.77	PR1	27.76	PR2	29.52	PR2	29.81	PR2	29.76	PR3	31.03	PR3	31.68	PR3	31.14	PC1	25.26	PC1	25.31	PC1	25.45	PC2	29.45	PC2	29.6	PC2	29.85
spl.75	C1	25.75	C2	30.5	C3	26.46	C1	25.67	C2	30.86	C3	26.49	C1	25.88	C2	30.82	C3	26.46	C1	25.56	C2	30.86	C3	26.98	C1	25.77	C2	30.56	C3	26.8
spl.75	C1	25.72	C2	30.32	C3	26.33	C1	25.71	C2	30.83	C3	26.47	C1	25.74	C2	30.69	C3	26.4	C1	25.58	C2	30.78	C3	26.79	C1	25.76	C2	30.52	C3	26.85
spl.75	C1	25.36	C2	30.57	C3	26.39	C1	25.7	C2	30.79	C3	26.49	C1	25.7	C2	30.61	C3	26.4	C1	25.62	C2	30.86	C3	26.8	C1	25.67	C2	30.47	C3	26.96
spl.75	PR1	26.6	PR1	26.47	PR1	26.58	PR2	27.93	PR2	28.02	PR2	28.16	PR3	29.74	PR3	29.96	PR3	29.92	PC1	24.61	PC1	24.69	PC1	24.78	PC2	28.43	PC2	28.82	PC2	28.94
spl.75	PR1	26.55	PR1	26.35	PR1	26.54	PR2	27.87	PR2	28	PR2	28.05	PR3	29.68	PR3	29.93	PR3	29.8	PC1	24.63	PC1	24.75	PC1	24.66	PC2	28.41	PC2	28.73	PC2	28.82
spl.75	PR1	26.33	PR1	26.52	PR1	26.61	PR2	28.09	PR2	28.05	PR2	28.11	PR3	29.67	PR3	29.89	PR3	29.84	PC1	24.58	PC1	24.82	PC1	24.74	PC2	28.5	PC2	28.76	PC2	28.92
spl.76	C1	25.84	C2	30.74	C3	25.42	C1	25.93	C2	30.85	C3	25.53	C1	25.82	C2	30.77	C3	25.44	C1	25.7	C2	30.59	C3	25.69	C1	25.66	C2	30.28	C3	25.6
spl.76	C1	25.81	C2	30.69	C3	25.37	C1	25.84	C2	30.77	C3	25.6	C1	25.91	C2	30.85	C3	25.43	C1	25.68	C2	30.67	C3	25.8	C1	25.63	C2	30.32	C3	25.65
spl.76	C1	25.87	C2	30.78	C3	25.47	C1	25.92	C2	30.85	C3	25.53	C1	25.79	C2	30.85	C3	25.41	C1	25.71	C2	30.59	C3	25.77	C1	25.65	C2	30.5	C3	25.74
spl.76	PR1	27.84	PR1	27.9	PR1	27.9	PR2	29.31	PR2	29.34	PR2	29.21	PR3	30.91	PR3	31.03	PR3	30.85	PC1	22.9	PC1	22.85	PC1	22.93	PC2	26.44	PC2	26.51	PC2	26.59
spl.76	PR1	27.79	PR1	27.85	PR1	27.84	PR2	29.23	PR2	29.34	PR2	29.32	PR3	30.7	PR3	31.07	PR3	30.73	PC1	22.87	PC1	23.15	PC1	22.96	PC2	26.35	PC2	26.55	PC2	26.59
spl.76	PR1	27.92	PR1	27.93	PR1	28	PR2	29.37	PR2	29.4	PR2	29.27	PR3	30.75	PR3	30.97	PR3	30.94	PC1	22.9	PC1	23.16	PC1	23.04	PC2	26.31	PC2	26.65	PC2	26.62
spl.77	C1	25.18	C2	30.44	C3	26.85	C1	25.26	C2	30.53	C3	26.93	C1	25.21	C2	30.51	C3	27.06	C1	24.98	C2	30.33	C3	27.26	C1	25.01	C2	29.96	C3	27.29
spl.77	C1	25.18	C2	30.25	C3	26.9	C1	25.18	C2	30.34	C3	26.91	C1	25.24	C2	30.38	C3	26.91	C1	24.91	C2	30.18	C3	27.16	C1	25.03	C2	29.97	C3	26.94
spl.77	C1	25.2	C2	30.3	C3	27.09	C1	25.17	C2	30.47	C3	27.31	C1	25.27	C2	30.56	C3	27.37	C1	24.89	C2	30.4	C3	27.78	C1	25.01	C2	30.03	C3	27.98
spl.77	PR1	26.59	PR1	26.47	PR1	26.52	PR2	27.82	PR2	27.96	PR2	27.88	PR3	29.76	PR3	29.95	PR3	30.02	PC1	21.84	PC1	21.94	PC1	22.11	PC2	25.45	PC2	25.79	PC2	25.78
spl.77	PR1	26.48	PR1	26.45	PR1	26.46	PR2	27.79	PR2	27.74	PR2	27.78	PR3	29.63	PR3	29.83	PR3	29.8	PC1	21.84	PC1	21.99	PC1	21.95	PC2	25.66	PC2	25.71	PC2	25.74
spl.77	PR1	26.48	PR1	26.4	PR1	27.07	PR2	27.77	PR2	27.8	PR2	28.64	PR3	29.71	PR3	30.01	PR3	30.55	PC1	21.81	PC1	22.2	PC1	23.28	PC2	25.51	PC2	25.99	PC2	26.71
spl.78	C1	24.7	C2	30.28	C3	26.52	C1	24.71	C2	30.22	C3	26.44	C1	24.65	C2	30.36	C3	26.56	C1	24.47	C2	29.9	C3	26.82	C1	24.37	C2	29.64	C3	26.26
spl.78	C1	24.63	C2	30.2	C3	26.48	C1	24.59	C2	30.18	C3	26.5	C1	24.65	C2	30.03	C3	26.49	C1	24.44	C2	30.01	C3	26.54	C1	24.5	C2	29.36	C3	26.15
spl.78	C1	24.69	C2	30.24	C3	26.49	C1	24.82	C2	30.02	C3	26.53	C1	24.77	C2	30.14	C3	26.53	C1	24.41	C2	30.11	C3	26.73	C1	24.59	C2	29.62	C3	26.4
spl.78	PR1	26.71	PR1	26.73	PR1	26.76	PR2	27.79	PR2	27.9	PR2	27.93	PR3	29.71	PR3	30.04	PR3	30.03	PC1	21.01	PC1	21.15	PC1	21.15	PC2	24.52	PC2	24.87	PC2	24.87
spl.78	PR1	26.73	PR1	26.78	PR1	26.76	PR2	27.86	PR2	27.99	PR2	27.9	PR3	29.68	PR3	30.17	PR3	29.98	PC1	21.02	PC1	21.24	PC1	21.12	PC2	24.56	PC2	24.74	PC2	24.9
spl.78	PR1	26.72	PR1	26.74	PR1	26.83	PR2	27.95	PR2	27.93	PR2	27.97	PR3	29.86	PR3	29.91	PR3	30.05	PC1	21.04	PC1	21.22	PC1	21.07	PC2	24.7	PC2	24.93	PC2	24.94
spl.79	C1	27.38	C2	31.36	C3	28.22	C1	27.44	C2	31.41	C3	28.35	C1	27.64	C2	31.62	C3	28.36	C1	27.09	C2	31.94	C3	28.64	C1	27.17	C2	30.35	C3	28.26
spl.79	C1	27.51	C2	31.2	C3	28.38	C1	27.48	C2	31.57	C3	28.5	C1	27.57	C2	31.7	C3	28.42	C1	27.13	C2	32.13	C3	28.65	C1	27.3	C2	30.62	C3	28.38
spl.79	C1	27.56	C2	31.36	C3	28.4	C1	27.59	C2	31.56	C3	28.52	C1	27.6	C2	31.64	C3	28.42	C1	27.21	C2	31.7	C3	28.61	C1	27.23	C2	30.81	C3	28.44
spl.79	PR1	27.93	PR1	28.03	PR1	27.88	PR2	30.69	PR2	30.48	PR2	30.67	PR3	32.13	PR3	32.49	PR3	32.36	PC1	23.34	PC1	23.33	PC1	23.42	PC2	27.49	PC2	27.31	PC2	27.44
spl.79	PR1	27.95	PR1	28	PR1	28.02	PR2	30.92	PR2	30.92	PR2	30.67	PR3	32.31	PR3	32.13	PR3	32.37	PC1	23.36	PC1	23.47	PC1	23.44	PC2	27.48	PC2	27.53	PC2	27.56
spl.79	PR1	28.05	PR1	28.1	PR1	27.97	PR2	30.77	PR2	30.83	PR2	30.76	PR3	32.26	PR3	32.33	PR3	32.49	PC1	23.42	PC1	23.37	PC1	23.38	PC2	27.5	PC2	27.65	PC2	27.71
spl.80	C1	26.34	C2	31.26	C3	27.55	C1	26.29	C2	31.23	C3	27.64	C1	26.46	C2	31.38	C3	27.67	C1	26.06	C2	30.9	C3	27.91	C1	26.26	C2	30.8	C3	27.63
spl.80	C1	26.44	C2	30.89	C3	27.79	C1	26.34	C2	31.22	C3	27.88	C1	26.54	C2	31.15	C3	27.9	C1	26.11	C2	30.98	C3	28.15	C1	26.33	C2	30.82	C3	27.96
spl.80	C1	26.29	C2	31.24	C3	27.86	C1	26.53	C2	31.19	C3	27.95	C1	26.23	C2	31.2	C3	27.81	C1	26.11	C2	32.14	C3	28.21	C1	26.44	C2	31.78	C3	28.07
spl.80	PR1	27.41	PR1	27.35	PR1	27.41	PR2	29.39	PR2	29.37	PR2	29.29	PR3	30.77	PR3	31.01	PR3	30.99	PC1	23.18	PC1	23.22	PC1	23.29	PC2	27.58	PC2	27.77	PC2	27.61
spl.80	PR1	27.49	PR1	27.45	PR1	27.38	PR2	29.45	PR2	29.42	PR2	29.43	PR3	30.85	PR3	31.12	PR3	30.99	PC1	23.24	PC1	23.36	PC1	23.44	PC2	27.69	PC2	27.84	PC2	27.8
spl.80	PR1	27.32	PR1	27.47	PR1	27.51	PR2	29.44	PR2	29.42	PR2	29.52	PR3	30.69	PR3	30.92	PR3	31.19	PC1	23.3	PC1	23.4	PC1	23.48	PC2	27.72	PC2	27.99	PC2	28.02
spl.81	C1	28.01	C2	32.14	C3	28.79	C1	28.06	C2	32.29	C3	28.94	C1	28.12	C2	32.34	C3	28.75	C1	27.6	C2	32.19	C3	29.09	C1	27.78	C2	31.94	C3	29.07
spl.81	C1	28.06	C2	31.95	C3	28.71	C1	28.17	C2	32.45	C3	28.73	C1	28.53	C2	32.15	C3	28.69	C1	27.53	C2	32.18	C3	28.94	C1	27.85	C2	31.55	C3	28.96
spl.81	C1	28.11	C2	32.28	C3	28.67	C1	28.17	C2	32.45	C3	28.85	C1	28.35	C2	32.4	C3	28.67	C1	27.6	C2	32.05	C3	29.08	C1	27.98	C2	31.9	C3	29.43
spl.81	PR1	29.2	PR1	29.16	PR1	29.28	PR2	31.25	PR2	31.24	PR2	31.36	PR3	32.35	PR3	32.73	PR3	32.71	PC1	23.78	PC1	23.94	PC1	23.99	PC2	27.69	PC2	28.09	PC2	28.12
spl.81	PR1	29.34	PR1	29.32	PR1	29.18	PR2	31.23	PR2	31.34	PR2	31.3	PR3	32.73	PR3	32.57	PR3	32.55	PC1	23.69	PC1	24	PC1	23.89	PC2	27.74	PC2	28.04	PC2	27.98
spl.81	PR1	29.23	PR1	29.45	PR1	29.18	PR2	31.38	PR2	31.24	PR2	31.34	PR3	32.57	PR3	32.95	PR3	32.62	PC1	23.75	PC1	24.02	PC1	23.81	PC2	27.85	PC2	28.06	PC2	28.67
spl.82	C1	26.3	C2	31.34	C3	28.29	C1	26.26	C2	31.32	C3	28.43	C1	26.39	C2	31.58	C3	28.4	C1	26.03	C2	31.15	C3	28.66	C1	26.27	C2	30.79	C3	28.66
spl.82	C1	26.19	C2	31.33	C3	28.32	C1	26.4	C2	31.39	C3	28.48	C1	26.81	C2	31.55	C3	28.3	C1	26.07	C2	31.25	C3	28.68	C1	26.28	C2	30.85	C3	28.76
spl.82	C1	26.37	C2	31.51	C3	28.31	C1	26.35	C2	31.39	C3	28.57	C1	26.43	C2	31.34	C3	28.31	C1	26.17	C2	31.3	C3	28.83	C1	26.31	C2	31.13	C3	28.73
spl.82	PR1	28.31	PR1	28.34	PR1	28.25	PR2	30.24	PR2	30.39	PR2	30.48	PR3	31.81	PR3	32.11	PR3	31.94	PC1	23.95	PC1	24.08	PC1	24.2	PC2	27.95	PC2	28.14	PC2	28.29
spl.82	PR1	28.21	PR1	28.23	PR1	28.33	PR2	30.48	PR2	30.26	PR2	30.42	PR3	32.26	PR3	32.33	PR3	31.99	PC1	23.97	PC1	24.17	PC1	24.13	PC2	27.91	PC2	28.16	PC2	28.22
spl.82	PR1	28.27	PR1	28.37	PR1	28.3	PR2	30.58	PR2	30.38	PR2	30.37	PR3	31.8	PR3	32.21	PR3	32.24	PC1	23.97	PC1	24.12	PC1	24.22	PC2	27.86	PC2	28.25	PC2	28.33
spl.83	C1	23.96	C2	29.46	C3	25.8	C1	23.97	C2	29.55	C3	25.93	C1	23.82	C2	29.55	C3	25.85	C1	23.64	C2	29.44	C3	26.12	C1	24.08	C2	29	C3	25.62
spl.83	C1	23.93	C2	29.49	C3	25.76	C1	23.97	C2	29.54	C3	25.88	C1	24.04	C2	29.6	C3	25.85	C1	23.71	C2	29.45	C3	26.04	C1	23.87	C2	29.25	C3	25.69
spl.83	C1	23.98	C2	29.44	C3	25.78	C1	24.03	C2	29.52	C3	25.92	C1	23.86	C2	29.61	C3	25.84	C1	23.61	C2	29.5	C3	26.17	C1	23.84	C2	29.35	C3	25.87
spl.83	PR1	26.23	PR1	26.25	PR1	26.29	PR2	27.45	PR2	27.48	PR2	27.56	PR3	29.45	PR3	29.81	PR3	29.88	PC1	20.76	PC1	20.95	PC1	21	PC2	24.88	PC2	25	PC2	24.86
spl.83	PR1	26.17	PR1	26.14	PR1	26.2	PR2	27.5	PR2	27.55	PR2	27.59	PR3	29.52	PR3	29.8	PR3	29.81	PC1	20.86	PC1	20.91	PC1	20.97	PC2	24.64	PC2	25.03	PC2	24.97
spl.83	PR1	26.2	PR1	26.13	PR1	26.22	PR2	27.51	PR2	27.52	PR2	27.59	PR3	29.53	PR3	29.79	PR3	29.88	PC1	20.75	PC1	20.86	PC1	20.97	PC2	24.68	PC2	25.03	PC2	24.96
spl.84	C1	26.58	C2	30.84	C3	28.4	C1	26.48	C2	31.09	C3	28.47	C1	26.58	C2	31.35	C3	28.34	C1	26.2	C2	31.06	C3	28.71	C1	26.41	C2	30.64	C3	28.68
spl.84	C1	26.55	C2	31.01	C3	28.27	C1	26.46	C2	31.11	C3	28.47	C1	26.53	C2	31.16	C3	28.41	C1	26.25	C2	30.85	C3	28.71	C1	26.4	C2	30.9	C3	28.73
spl.84	C1	26.6	C2	31.53	C3	28.29	C1	26.63	C2	31.23	C3	28.47	C1	26.52	C2	31.07	C3	28.47	C1	26.27	C2	31.12	C3	28.53	C1	26.38	C2	30.8	C3	28.46
spl.84	PR1	27.78	PR1	27.78	PR1	27.75	PR2	30.28	PR2	30.34	PR2	30.37	PR3	31.75	PR3	31.85	PR3	31.83	PC1	23.12	PC1	23.37	PC1	23.41	PC2	27.29	PC2	27.54	PC2	27.53
spl.84	PR1	27.67	PR1	27.63	PR1	27.62	PR2	30.22	PR2	30.25	PR2	30.5	PR3	31.68	PR3	32.02	PR3	32.12	PC1	23.12	PC1	23.24	PC1	23.21	PC2	27.17	PC2	27.55	PC2	27.55
spl.84	PR1	27.89	PR1	28.16	PR1	27.91	PR2	30.36	PR2	30.31	PR2	30.63	PR3	31.61	PR3	31.94	PR3	32.01	PC1	23.22	PC1	23.44	PC1	23.42	PC2	27.31	PC2	27.63	PC2	27.62
spl.85	C1	24.58	C2	30.09	C3	25.84	C1	24.66	C2	30.05	C3	25.93	C1	24.63	C2	30.32	C3	25.92	C1	24.42	C2	30.26	C3	26.23	C1	24.44	C2	29.74	C3	26.22
spl.85	C1	24.59	C2	30.07	C3	25.82	C1	24.73	C2	30.27	C3	25.83	C1	24.43	C2	30.28	C3	25.87	C1	24.54	C2	30.13	C3	26.17	C1	24.53	C2	29.74	C3	26.08
spl.85	C1	24.55	C2	30.02	C3	25.72	C1	24.69	C2	30.13	C3	25.83	C1	24.81	C2	30.21	C3	25.85	C1	24.53	C2	30.02	C3	26.1	C1	24.49	C2	29.82	C3	26.18
spl.85	PR1	25.9	PR1	25.91	PR1	26.03	PR2	27.35	PR2	27.35	PR2	27.45	PR3	29.27	PR3	29.57	PR3	29.61	PC1	21.99	PC1	22.1	PC1	22.04	PC2	25.63	PC2	25.97	PC2	26.09
spl.85	PR1	25.95	PR1	25.9	PR1	25.99	PR2	27.4	PR2	27.29	PR2	27.39	PR3	29.17	PR3	29.63	PR3	29.65	PC1	22.08	PC1	22.1	PC1	22.13	PC2	25.69	PC2	25.92	PC2	26.05
spl.85	PR1	26	PR1	25.91	PR1	25.99	PR2	27.5	PR2	27.31	PR2	27.46	PR3	29.52	PR3	29.5	PR3	29.55	PC1	21.99	PC1	22.01	PC1	22.11	PC2	25.63	PC2	25.94	PC2	26.12
spl.86	C1	25.15	C2	30.66	C3	27.1	C1	25.11	C2	30.9	C3	27.13	C1	25.13	C2	30.82	C3	27.16	C1	25.06	C2	30.95	C3	27.64	C1	25.16	C2	30.91	C3	27.5
spl.86	C1	25.6	C2	30.8	C3	27.02	C1	25.31	C2	30.9	C3	27.24	C1	25.17	C2	30.8	C3	26.99	C1	25.05	C2	31.19	C3	27.65	C1	25.07	C2	31.04	C3	27.59
spl.86	C1	25.25	C2	30.86	C3	26.92	C1	25.32	C2	30.88	C3	27.09	C1	25.12	C2	30.87	C3	27.08	C1	25.08	C2	30.94	C3	27.58	C1	25.12	C2	30.91	C3	27.64
spl.86	PR1	26.99	PR1	27.08	PR1	27.1	PR2	28.54	PR2	28.64	PR2	28.66	PR3	30	PR3	30.5	PR3	30.42	PC1	27.84	PC1	28.3	PC1	28.41	PC2	31.87	PC2	32.27	PC2	32.37
spl.86	PR1	27.36	PR1	27.04	PR1	27.02	PR2	28.58	PR2	28.78	PR2	28.72	PR3	30.13	PR3	30.54	PR3	30.25	PC1	28.06	PC1	28.38	PC1	28.39	PC2	32.03	PC2	32.54	PC2	32.37
spl.86	PR1	27.18	PR1	27.07	PR1	27.05	PR2	28.83	PR2	28.75	PR2	28.8	PR3	30.12	PR3	30.46	PR3	30.43	PC1	28.03	PC1	28.24	PC1	28.4	PC2	32.1	PC2	32.38	PC2	32.48
spl.87	C1	26.37	C2	30.97	C3	27.44	C1	26.38	C2	31.17	C3	27.39	C1	26.47	C2	31.02	C3	27.4	C1	26.28	C2	30.82	C3	27.86	C1	26.32	C2	30.7	C3	27.76
spl.87	C1	26.46	C2	31.13	C3	27.32	C1	26.49	C2	31	C3	27.4	C1	26.5	C2	31.23	C3	27.32	C1	26.31	C2	30.67	C3	27.77	C1	26.35	C2	30.72	C3	27.66
spl.87	C1	26.48	C2	31.19	C3	27.41	C1	26.64	C2	31.08	C3	27.49	C1	26.55	C2	31.39	C3	27.46	C1	26.31	C2	31.33	C3	27.79	C1	26.47	C2	30.7	C3	27.8
spl.87	PR1	29.48	PR1	29.69	PR1	29.71	PR2	31.01	PR2	31.23	PR2	31.01	PR3	32.42	PR3	32.89	PR3	32.79	PC1	24.49	PC1	24.61	PC1	24.61	PC2	28.51	PC2	28.79	PC2	28.85
spl.87	PR1	29.5	PR1	29.64	PR1	29.52	PR2	31.44	PR2	31.53	PR2	31.23	PR3	32.75	PR3	33.07	PR3	32.62	PC1	24.5	PC1	24.5	PC1	24.64	PC2	28.45	PC2	28.79	PC2	28.75
spl.87	PR1	29.45	PR1	29.69	PR1	29.62	PR2	31.41	PR2	31.32	PR2	31.36	PR3	32.71	PR3	32.98	PR3	32.89	PC1	24.5	PC1	24.54	PC1	24.62	PC2	28.59	PC2	28.89	PC2	28.94
spl.88	C1	25.91	C2	30.25	C3	26.54	C1	25.85	C2	30.52	C3	26.61	C1	25.88	C2	30.62	C3	26.52	C1	25.54	C2	30.32	C3	26.97	C1	25.73	C2	29.99	C3	26.8
spl.88	C1	25.71	C2	30.27	C3	26.46	C1	25.92	C2	30.42	C3	26.56	C1	26.03	C2	30.54	C3	26.51	C1	25.52	C2	30.47	C3	26.83	C1	25.74	C2	29.73	C3	26.54
spl.88	C1	25.95	C2	30.37	C3	26.57	C1	25.91	C2	30.74	C3	26.66	C1	25.98	C2	30.44	C3	26.57	C1	25.57	C2	30.9	C3	26.98	C1	25.75	C2	30.11	C3	26.78
spl.88	PR1	26.79	PR1	26.68	PR1	26.8	PR2	28.32	PR2	28.47	PR2	28.47	PR3	30.27	PR3	30.47	PR3	30.3	PC1	22.32	PC1	22.42	PC1	22.66	PC2	26.3	PC2	26.5	PC2	26.53
spl.88	PR1	26.82	PR1	26.73	PR1	26.72	PR2	28.46	PR2	28.46	PR2	28.33	PR3	30.28	PR3	30.32	PR3	30.2	PC1	22.31	PC1	22.49	PC1	22.54	PC2	26.28	PC2	26.43	PC2	26.46
spl.88	PR1	26.88	PR1	26.9	PR1	26.91	PR2	28.48	PR2	28.58	PR2	28.63	PR3	30.15	PR3	30.29	PR3	30.48	PC1	22.36	PC1	22.57	PC1	22.57	PC2	26.35	PC2	26.52	PC2	26.6
spl.89	C1	24.91	C2	30.31	C3	26.8	C1	24.98	C2	30.29	C3	27.02	C1	24.95	C2	30.36	C3	26.79	C1	24.74	C2	30.15	C3	27.1	C1	24.89	C2	29.97	C3	26.89
spl.89	C1	25.26	C2	30.37	C3	26.93	C1	24.75	C2	30.41	C3	27.01	C1	25.09	C2	30.45	C3	26.87	C1	24.7	C2	30.38	C3	27.43	C1	24.81	C2	30.03	C3	27.31
spl.89	C1	24.89	C2	30.45	C3	27.03	C1	25.01	C2	30.44	C3	27.1	C1	25.05	C2	30.55	C3	27.04	C1	24.72	C2	30.36	C3	27.24	C1	24.83	C2	30.12	C3	26.94
spl.89	PR1	27.44	PR1	27.36	PR1	27.35	PR2	28.91	PR2	28.92	PR2	29.04	PR3	30.69	PR3	30.83	PR3	30.64	PC1	21.99	PC1	22.16	PC1	22.1	PC2	25.85	PC2	25.95	PC2	25.9
spl.89	PR1	27.8	PR1	27.48	PR1	27.51	PR2	28.9	PR2	28.86	PR2	28.91	PR3	30.6	PR3	30.87	PR3	30.85	PC1	22.1	PC1	22.17	PC1	22.22	PC2	25.6	PC2	25.95	PC2	26.08
spl.89	PR1	27.47	PR1	27.41	PR1	27.51	PR2	28.95	PR2	28.87	PR2	28.95	PR3	30.65	PR3	30.85	PR3	30.83	PC1	22.03	PC1	22.13	PC1	22.16	PC2	25.75	PC2	25.97	PC2	25.95
spl.90	C1	25.28	C2	30.44	C3	27.11	C1	25.39	C2	30.48	C3	27.13	C1	25.33	C2	30.36	C3	27.07	C1	24.99	C2	30.36	C3	27.41	C1	25.18	C2	30.22	C3	27.32
spl.90	C1	25.32	C2	30.33	C3	27.01	C1	25.33	C2	30.44	C3	27.24	C1	25.27	C2	30.49	C3	27.11	C1	25.09	C2	30.37	C3	27.53	C1	25.15	C2	30.1	C3	27.48
spl.90	C1	25.31	C2	30.32	C3	27.19	C1	25.32	C2	30.33	C3	27.18	C1	25.47	C2	30.47	C3	27.31	C1	24.98	C2	30.24	C3	27.58	C1	25.09	C2	29.88	C3	27.74
spl.90	PR1	27.24	PR1	27.23	PR1	27.34	PR2	28.84	PR2	28.9	PR2	29	PR3	30.59	PR3	30.99	PR3	30.92	PC1	21.64	PC1	22.03	PC1	21.95	PC2	25.94	PC2	26.22	PC2	26.29
spl.90	PR1	27.28	PR1	27.29	PR1	27.34	PR2	28.91	PR2	28.94	PR2	28.97	PR3	30.62	PR3	31.04	PR3	30.88	PC1	21.96	PC1	22.06	PC1	22.07	PC2	25.99	PC2	26.24	PC2	26.29
spl.90	PR1	27.32	PR1	27.29	PR1	27.17	PR2	28.83	PR2	28.81	PR2	28.82	PR3	30.73	PR3	30.77	PR3	30.92	PC1	21.85	PC1	21.97	PC1	22	PC2	25.9	PC2	26.22	PC2	26.31
spl.91	C1	26.26	C2	30.91	C3	26.98	C1	26.16	C2	31.02	C3	27.2	C1	26.21	C2	30.7	C3	27.08	C1	25.86	C2	30.66	C3	27.58	C1	26.13	C2	30.56	C3	27.42
spl.91	C1	26.38	C2	30.69	C3	27.08	C1	26.33	C2	30.98	C3	27.24	C1	26.3	C2	30.92	C3	27.14	C1	26.04	C2	30.88	C3	27.62	C1	26.11	C2	30.42	C3	27.54
spl.91	C1	26.15	C2	30.7	C3	27.29	C1	26.2	C2	30.79	C3	27.37	C1	26.26	C2	31.02	C3	27.26	C1	25.96	C2	30.68	C3	27.58	C1	26.03	C2	30.33	C3	27.8
spl.91	PR1	27.1	PR1	26.99	PR1	27.06	PR2	28.76	PR2	28.84	PR2	28.88	PR3	30.09	PR3	30.44	PR3	30.44	PC1	22.73	PC1	22.87	PC1	22.93	PC2	26.81	PC2	27.1	PC2	27.18
spl.91	PR1	27.2	PR1	27.11	PR1	26.99	PR2	28.81	PR2	28.74	PR2	28.84	PR3	30.24	PR3	30.58	PR3	30.52	PC1	22.81	PC1	22.92	PC1	22.98	PC2	26.81	PC2	26.95	PC2	27.26
spl.91	PR1	27	PR1	27.03	PR1	27.03	PR2	28.6	PR2	28.61	PR2	28.72	PR3	30.19	PR3	30.51	PR3	30.29	PC1	22.7	PC1	22.95	PC1	22.94	PC2	26.86	PC2	27.06	PC2	27.17
spl.92	C1	28.1	C2	31.08	C3	28.78	C1	28.08	C2	31.2	C3	29.08	C1	28.13	C2	31.18	C3	28.89	C1	27.88	C2	31.07	C3	29.45	C1	28.03	C2	31.27	C3	29.43
spl.92	C1	27.98	C2	31.26	C3	28.99	C1	28.07	C2	31.39	C3	29	C1	28.15	C2	31.33	C3	29	C1	27.88	C2	31.14	C3	29.54	C1	28.04	C2	31.11	C3	29.54
spl.92	C1	28.02	C2	31.09	C3	29.15	C1	28.04	C2	31.38	C3	29.25	C1	28.14	C2	31.2	C3	29.11	C1	27.85	C2	31.06	C3	29.65	C1	28.05	C2	31.08	C3	29.67
spl.92	PR1	28.22	PR1	28.25	PR1	28.04	PR2	30.87	PR2	30.89	PR2	31.05	PR3	32.12	PR3	32.28	PR3	32.17	PC1	25.97	PC1	25.99	PC1	26.2	PC2	30.04	PC2	30.42	PC2	30.4
spl.92	PR1	28.14	PR1	28.33	PR1	28.13	PR2	31.1	PR2	30.88	PR2	30.98	PR3	32.24	PR3	32.34	PR3	32.47	PC1	26.09	PC1	26.02	PC1	26.1	PC2	30.12	PC2	30.27	PC2	30.32
spl.92	PR1	28.2	PR1	28.22	PR1	28.15	PR2	30.75	PR2	30.76	PR2	30.96	PR3	32.31	PR3	32.32	PR3	32.44	PC1	26.05	PC1	26.11	PC1	26.12	PC2	30.14	PC2	30.33	PC2	30.36
spl.93	C1	27.04	C2	31.25	C3	28.59	C1	27.06	C2	31.38	C3	28.75	C1	27.17	C2	31.51	C3	28.62	C1	27.15	C2	31.54	C3	29.28	C1	27.18	C2	31.35	C3	29.08
spl.93	C1	27.23	C2	31.26	C3	28.69	C1	27.17	C2	31.51	C3	28.75	C1	27.21	C2	31.68	C3	28.85	C1	27.19	C2	31.5	C3	29.21	C1	27.09	C2	31.22	C3	29.37
spl.93	C1	27.14	C2	31.28	C3	28.82	C1	27.24	C2	31.34	C3	28.83	C1	27.17	C2	31.85	C3	28.96	C1	27.18	C2	31.31	C3	29.3	C1	27.18	C2	31.67	C3	29.5
spl.93	PR1	27.51	PR1	27.53	PR1	27.39	PR2	29.93	PR2	29.92	PR2	29.86	PR3	31.33	PR3	31.66	PR3	31.29	PC1	26.35	PC1	26.4	PC1	26.38	PC2	30.56	PC2	30.98	PC2	30.95
spl.93	PR1	27.56	PR1	27.4	PR1	27.44	PR2	29.93	PR2	29.99	PR2	29.91	PR3	31.45	PR3	31.98	PR3	31.61	PC1	26.35	PC1	26.36	PC1	26.43	PC2	30.74	PC2	31.09	PC2	31.02
spl.93	PR1	27.55	PR1	27.5	PR1	27.4	PR2	30.04	PR2	29.84	PR2	29.81	PR3	31.45	PR3	31.63	PR3	31.5	PC1	26.31	PC1	26.34	PC1	26.42	PC2	30.7	PC2	31.04	PC2	31.02
spl.94	C1	27.93	C2	31.42	C3	28.4	C1	28.12	C2	31.62	C3	28.48	C1	28.12	C2	31.63	C3	28.43	C1	27.8	C2	31.36	C3	28.88	C1	27.95	C2	31.24	C3	28.99
spl.94	C1	28.05	C2	31.5	C3	28.38	C1	28.17	C2	31.77	C3	28.47	C1	28.14	C2	31.87	C3	28.5	C1	27.86	C2	31.32	C3	29.04	C1	28.11	C2	31.36	C3	29.03
spl.94	C1	28	C2	31.47	C3	28.66	C1	28.09	C2	31.7	C3	28.74	C1	28.05	C2	31.61	C3	28.68	C1	27.72	C2	31.49	C3	29.14	C1	28.04	C2	31.28	C3	29.15
spl.94	PR1	28.31	PR1	28.37	PR1	28.36	PR2	31.11	PR2	31.02	PR2	31.17	PR3	32.45	PR3	32.51	PR3	32.51	PC1	24.99	PC1	24.98	PC1	25.16	PC2	29.91	PC2	30.05	PC2	30.29
spl.94	PR1	28.48	PR1	28.43	PR1	28.29	PR2	31.17	PR2	31.2	PR2	31.28	PR3	32.44	PR3	32.53	PR3	32.63	PC1	25.02	PC1	24.97	PC1	25.23	PC2	29.87	PC2	30.16	PC2	30.28
spl.94	PR1	28.4	PR1	28.44	PR1	28.49	PR2	31.09	PR2	31.16	PR2	31.38	PR3	32.53	PR3	32.61	PR3	32.54	PC1	24.97	PC1	25.07	PC1	25.17	PC2	29.99	PC2	30.3	PC2	30.34
spl.97	C1	26.52	C2	31.49	C3	29.04	C1	26.35	C2	31.67	C3	29.09	C1	26.32	C2	32.03	C3	29.81	C1	25.99	C2	31.47	C3	29.55	C1	26.23	C2	31.45	C3	32.57
spl.97	C1	26.62	C2	31.76	C3	29.15	C1	26.52	C2	31.97	C3	29.16	C1	26.42	C2	31.78	C3	29.87	C1	26.04	C2	31.59	C3	29.57	C1	26.24	C2	31.67	C3	32.76
spl.97	C1	26.8	C2	31.79	C3	29.15	C1	26.56	C2	32.08	C3	29.3	C1	26.46	C2	31.63	C3	29.98	C1	26.06	C2	31.79	C3	29.66	C1	26.25	C2	31.89	C3	32.94
spl.97	PR1	28.72	PR1	28.58	PR1	28.62	PR2	31.42	PR2	31.36	PR2	31.31	PR3	32.28	PR3	32.68	PR3	32.65	PC1	22.73	PC1	22.91	PC1	23.02	PC2	27.03	PC2	27.04	PC2	26.76
spl.97	PR1	28.75	PR1	28.59	PR1	28.63	PR2	31.57	PR2	31.43	PR2	31.5	PR3	32.34	PR3	32.6	PR3	32.67	PC1	22.76	PC1	22.96	PC1	23.06	PC2	27.14	PC2	27.06	PC2	26.98
spl.97	PR1	28.83	PR1	28.74	PR1	28.67	PR2	31.6	PR2	31.51	PR2	31.51	PR3	32.38	PR3	32.6	PR3	32.92	PC1	22.78	PC1	23.04	PC1	23.14	PC2	27.2	PC2	27.22	PC2	27.24
spl.99	C1	27.53	C2	32.12	C3	29.49	C1	27.38	C2	32.18	C3	29.52	C1	27.47	C2	32.82	C3	30.33	C1	27.01	C2	32.08	C3	29.89	C1	27.26	C2	31.85	C3	30.63
spl.99	C1	27.54	C2	32.34	C3	29.55	C1	27.39	C2	32.28	C3	29.68	C1	27.51	C2	32.36	C3	30.36	C1	27.09	C2	32.27	C3	30.03	C1	27.29	C2	32.14	C3	30.7
spl.99	C1	27.55	C2	32.44	C3	29.65	C1	27.51	C2	32.62	C3	29.79	C1	27.56	C2	32.34	C3	30.45	C1	27.1	C2	32.33	C3	30.24	C1	27.32	C2	32.63	C3	31.13
spl.99	PR1	28.18	PR1	28.32	PR1	28.3	PR2	29.88	PR2	30.23	PR2	30.4	PR3	31.79	PR3	32.11	PR3	32.1	PC1	22.75	PC1	23.01	PC1	23.12	PC2	27.34	PC2	27.24	PC2	26.54
spl.99	PR1	28.25	PR1	28.34	PR1	28.36	PR2	30.11	PR2	30.36	PR2	30.5	PR3	31.79	PR3	32.04	PR3	32.12	PC1	22.86	PC1	23.05	PC1	23.16	PC2	27.39	PC2	27.4	PC2	26.58
spl.99	PR1	28.32	PR1	28.42	PR1	28.36	PR2	30.15	PR2	30.39	PR2	30.56	PR3	31.82	PR3	31.99	PR3	32.13	PC1	22.9	PC1	23.1	PC1	23.21	PC2	27.44	PC2	27.41	PC2	26.63
spl.101	C1	26.69	C2	31.27	C3	28.58	C1	26.63	C2	31.46	C3	28.74	C1	26.8	C2	31.49	C3	29.35	C1	26.28	C2	31.41	C3	29.05	C1	26.38	C2	31.26	C3	31.67
spl.101	C1	26.9	C2	31.34	C3	28.77	C1	26.7	C2	31.59	C3	28.83	C1	26.81	C2	31.53	C3	29.55	C1	26.32	C2	31.44	C3	29.17	C1	26.39	C2	31.39	C3	32.78
spl.101	C1	26.93	C2	31.57	C3	28.8	C1	26.76	C2	31.63	C3	28.87	C1	26.84	C2	31.7	C3	29.61	C1	26.34	C2	31.54	C3	29.36	C1	26.4	C2	31.53	C3	33.01
spl.101	PR1	27.65	PR1	27.59	PR1	27.63	PR2	29.44	PR2	29.6	PR2	29.65	PR3	30.98	PR3	31.08	PR3	31.34	PC1	22.01	PC1	22.17	PC1	22.27	PC2	26.37	PC2	26.34	PC2	26.36
spl.101	PR1	27.74	PR1	27.61	PR1	27.7	PR2	29.5	PR2	29.67	PR2	29.73	PR3	31.13	PR3	31.45	PR3	31.5	PC1	22.04	PC1	22.2	PC1	22.33	PC2	26.37	PC2	26.35	PC2	26.49
spl.101	PR1	27.83	PR1	27.65	PR1	27.76	PR2	29.72	PR2	29.71	PR2	29.76	PR3	31.16	PR3	31.24	PR3	31.62	PC1	22.13	PC1	22.21	PC1	22.37	PC2	26.44	PC2	26.38	PC2	26.53
spl.102	C1	26.51	C2	31.13	C3	29.34	C1	26.48	C2	31.48	C3	29.51	C1	26.54	C2	31.69	C3	30.13	C1	26.33	C2	31.44	C3	29.8	C1	26.45	C2	31.46	C3	30.8
spl.102	C1	26.53	C2	31.31	C3	29.34	C1	26.53	C2	31.73	C3	29.54	C1	26.55	C2	31.68	C3	30.34	C1	26.48	C2	31.56	C3	29.92	C1	26.54	C2	31.62	C3	30.96
spl.102	C1	26.83	C2	31.48	C3	29.7	C1	26.56	C2	32.19	C3	29.83	C1	26.66	C2	31.56	C3	30.43	C1	26.49	C2	31.62	C3	30.35	C1	26.6	C2	31.85	C3	31.14
spl.102	PR1	26.6	PR1	26.53	PR1	26.53	PR2	29.23	PR2	29.15	PR2	29.31	PR3	31.18	PR3	31.47	PR3	31.41	PC1	25.43	PC1	25.5	PC1	25.8	PC2	30.52	PC2	30.62	PC2	30.71
spl.102	PR1	26.65	PR1	26.56	PR1	26.55	PR2	29.25	PR2	29.21	PR2	29.37	PR3	31.21	PR3	31.37	PR3	31.46	PC1	25.47	PC1	25.52	PC1	25.82	PC2	30.6	PC2	30.8	PC2	30.81
spl.102	PR1	26.92	PR1	26.64	PR1	26.78	PR2	29.26	PR2	29.47	PR2	29.42	PR3	31.26	PR3	31.35	PR3	31.52	PC1	25.56	PC1	25.6	PC1	25.84	PC2	30.61	PC2	30.91	PC2	30.86
spl.103	C1	25.58	C2	30.6	C3	27.72	C1	25.43	C2	30.77	C3	27.89	C1	25.63	C2	31.01	C3	28.49	C1	25.26	C2	30.44	C3	28.13	C1	25.6	C2	30.45	C3	28.48
spl.103	C1	25.6	C2	30.8	C3	27.86	C1	25.55	C2	31.03	C3	27.92	C1	25.72	C2	31.01	C3	28.67	C1	25.36	C2	30.56	C3	28.17	C1	25.64	C2	30.59	C3	28.51
spl.103	C1	25.68	C2	30.82	C3	28.66	C1	25.58	C2	31.03	C3	28.27	C1	25.74	C2	30.82	C3	28.91	C1	25.41	C2	30.86	C3	28.48	C1	26	C2	30.61	C3	28.78
spl.103	PR1	26.8	PR1	26.88	PR1	26.74	PR2	28.72	PR2	28.89	PR2	29.06	PR3	30.52	PR3	30.85	PR3	30.87	PC1	22.63	PC1	22.9	PC1	22.89	PC2	27.35	PC2	27.34	PC2	27.54
spl.103	PR1	26.83	PR1	26.92	PR1	26.82	PR2	28.75	PR2	28.93	PR2	29.09	PR3	30.62	PR3	30.93	PR3	30.93	PC1	22.74	PC1	22.94	PC1	22.99	PC2	27.4	PC2	27.44	PC2	27.6
spl.103	PR1	27.11	PR1	27.13	PR1	27.35	PR2	28.95	PR2	28.94	PR2	29.15	PR3	30.63	PR3	30.92	PR3	30.99	PC1	22.8	PC1	23.05	PC1	23.17	PC2	28.98	PC2	27.48	PC2	27.6
spl.104	C1	25.49	C2	30.95	C3	27.46	C1	25.19	C2	31.08	C3	27.35	C1	25.23	C2	27.23	C3	28.01	C1	25.05	C2	30.2	C3	27.23	C1	25.1	C2	30.5	C3	23.15
spl.104	C1	25.61	C2	30.96	C3	27.49	C1	25.21	C2	31.09	C3	27.46	C1	25.27	C2	31.3	C3	28.05	C1	25.09	C2	30.86	C3	27.66	C1	25.18	C2	30.9	C3	27.89
spl.104	C1	25.92	C2	31.03	C3	28.25	C1	25.95	C2	31.48	C3	27.86	C1	25.88	C2	31.18	C3	28.19	C1	25.62	C2	31.07	C3	27.97	C1	25.64	C2	31.17	C3	28.04
spl.104	PR1	27.65	PR1	27.55	PR1	27.65	PR2	28.8	PR2	28.86	PR2	29.1	PR3	30.66	PR3	31.19	PR3	31.15	PC1	21.43	PC1	20.63	PC1	21.5	PC2	25.67	PC2	25.76	PC2	25.05
spl.104	PR1	27.91	PR1	27.58	PR1	27.69	PR2	28.98	PR2	28.96	PR2	29.14	PR3	30.75	PR3	31.15	PR3	31.15	PC1	21.48	PC1	21.58	PC1	21.65	PC2	25.72	PC2	25.77	PC2	25.71
spl.104	PR1	27.93	PR1	27.59	PR1	27.94	PR2	29.13	PR2	29.24	PR2	29.22	PR3	31.5	PR3	29.96	PR3	31.19	PC1	21.53	PC1	21.66	PC1	21.68	PC2	26.39	PC2	25.89	PC2	25.81
spl.105	C1	24.75	C2	30.35	C3	27.46	C1	24.65	C2	30.28	C3	27.44	C1	24.72	C2	30.71	C3	28.3	C1	24.58	C2	30.38	C3	27.94	C1	24.62	C2	30.25	C3	28.16
spl.105	C1	24.94	C2	30.36	C3	27.7	C1	24.71	C2	30.3	C3	27.8	C1	24.8	C2	30.61	C3	28.33	C1	24.68	C2	30.58	C3	28.08	C1	24.72	C2	30.48	C3	28.2
spl.105	C1	24.96	C2	30.59	C3	27.71	C1	24.77	C2	30.6	C3	27.92	C1	24.81	C2	30.46	C3	28.49	C1	24.74	C2	30.81	C3	28.18	C1	24.83	C2	30.66	C3	28.34
spl.105	PR1	25.36	PR1	25.25	PR1	25.26	PR2	26.3	PR2	26.14	PR2	26.36	PR3	28.52	PR3	28.85	PR3	28.88	PC1	23.49	PC1	23.53	PC1	23.8	PC2	27.43	PC2	27.57	PC2	27.42
spl.105	PR1	25.54	PR1	25.36	PR1	25.36	PR2	26.34	PR2	26.2	PR2	26.44	PR3	28.64	PR3	28.78	PR3	28.94	PC1	23.64	PC1	23.68	PC1	23.81	PC2	27.58	PC2	27.63	PC2	27.67
spl.105	PR1	25.57	PR1	25.37	PR1	25.46	PR2	26.39	PR2	26.45	PR2	26.53	PR3	28.64	PR3	28.69	PR3	28.94	PC1	23.68	PC1	23.69	PC1	23.94	PC2	27.65	PC2	27.76	PC2	27.83
spl.106	C1	24.54	C2	29.98	C3	27.12	C1	24.4	C2	30.08	C3	27.01	C1	24.4	C2	30.27	C3	27.61	C1	24.35	C2	30.01	C3	27.39	C1	24.51	C2	29.85	C3	27.56
spl.106	C1	24.55	C2	30.07	C3	27.14	C1	24.47	C2	30.09	C3	27.11	C1	24.41	C2	30.24	C3	27.69	C1	24.4	C2	30.02	C3	27.44	C1	24.52	C2	29.86	C3	27.66
spl.106	C1	24.56	C2	30.14	C3	27.26	C1	24.49	C2	30.13	C3	27.14	C1	24.44	C2	30.24	C3	27.76	C1	24.52	C2	30.08	C3	27.59	C1	24.56	C2	29.94	C3	27.72
spl.106	PR1	27.84	PR1	27.7	PR1	27.81	PR2	28.97	PR2	29.01	PR2	29.22	PR3	30.75	PR3	31.07	PR3	31.05	PC1	23.08	PC1	23.2	PC1	23.38	PC2	27.13	PC2	27.19	PC2	27.26
spl.106	PR1	27.87	PR1	27.81	PR1	27.85	PR2	29.1	PR2	29.04	PR2	29.26	PR3	30.76	PR3	30.97	PR3	31.13	PC1	23.13	PC1	23.21	PC1	23.43	PC2	27.16	PC2	27.24	PC2	27.35
spl.106	PR1	27.91	PR1	27.82	PR1	27.86	PR2	29.17	PR2	29.25	PR2	29.28	PR3	30.84	PR3	31.04	PR3	31.21	PC1	23.17	PC1	23.26	PC1	23.47	PC2	27.18	PC2	27.4	PC2	27.39
spl.107	C1	24.56	C2	30.41	C3	27.36	C1	24.35	C2	30.6	C3	27.3	C1	24.51	C2	30.84	C3	27.83	C1	24.33	C2	30.47	C3	27.47	C1	24.52	C2	30.38	C3	27.86
spl.107	C1	24.57	C2	30.45	C3	27.41	C1	24.4	C2	30.64	C3	27.34	C1	24.53	C2	30.8	C3	27.93	C1	24.4	C2	30.5	C3	27.47	C1	24.52	C2	30.45	C3	27.9
spl.107	C1	24.57	C2	30.51	C3	27.58	C1	24.53	C2	30.72	C3	27.34	C1	24.61	C2	30.66	C3	27.99	C1	24.4	C2	30.55	C3	27.56	C1	24.56	C2	30.51	C3	28.03
spl.107	PR1	27.27	PR1	27.15	PR1	27.3	PR2	28.58	PR2	28.66	PR2	28.84	PR3	30.67	PR3	31.16	PR3	30.92	PC1	21.63	PC1	21.97	PC1	21.81	PC2	26.23	PC2	26.45	PC2	26.53
spl.107	PR1	27.32	PR1	27.22	PR1	27.42	PR2	28.61	PR2	28.67	PR2	28.86	PR3	30.74	PR3	31.08	PR3	31.05	PC1	21.76	PC1	21.98	PC1	21.9	PC2	26.36	PC2	26.46	PC2	26.54
spl.107	PR1	27.36	PR1	27.27	PR1	27.74	PR2	28.8	PR2	28.79	PR2	28.89	PR3	30.75	PR3	30.95	PR3	31.23	PC1	21.77	PC1	22.04	PC1	21.98	PC2	26.37	PC2	26.49	PC2	26.64
spl.108	C1	30.61	C2	33.44	C3	31.49	C1	30.35	C2	33.61	C3	31.34	C1	30.26	C2	33.86	C3	32.25	C1	29.73	C2	33.55	C3	31.8	C1	29.74	C2	33.3	C3	32.97
spl.108	C1	30.62	C2	33.44	C3	31.42	C1	30.46	C2	33.74	C3	31.43	C1	30.54	C2	33.84	C3	32.27	C1	29.82	C2	33.56	C3	31.81	C1	29.82	C2	33.6	C3	33.05
spl.108	C1	30.67	C2	33.63	C3	31.58	C1	30.69	C2	33.89	C3	31.48	C1	30.58	C2	33.62	C3	32.39	C1	30.04	C2	33.56	C3	31.94	C1	30.01	C2	33.86	C3	33.39
spl.108	PR1	30.77	PR1	30.28	PR1	30.59	PR2	33.25	PR2	33.01	PR2	33.07	PR3	34.1	PR3	34.11	PR3	34.1	PC1	24.34	PC1	24.52	PC1	24.76	PC2	29.29	PC2	29.2	PC2	29.75
spl.108	PR1	30.83	PR1	30.32	PR1	30.53	PR2	33.28	PR2	33.01	PR2	33.09	PR3	34.13	PR3	34.09	PR3	34.51	PC1	24.39	PC1	24.57	PC1	24.85	PC2	29.32	PC2	29.37	PC2	29.89
spl.108	PR1	30.93	PR1	30.35	PR1	30.82	PR2	33.29	PR2	33.03	PR2	33.2	PR3	34.31	PR3	34.25	PR3	34.58	PC1	24.46	PC1	24.6	PC1	24.92	PC2	29.33	PC2	29.39	PC2	30
spl.109	C1	23.78	C2	29.89	C3	26.7	C1	23.43	C2	29.83	C3	26.42	C1	23.63	C2	30.31	C3	27.49	C1	23.65	C2	30.19	C3	27.27	C1	23.73	C2	30	C3	27.3
spl.109	C1	23.84	C2	29.95	C3	26.68	C1	23.53	C2	30.1	C3	26.65	C1	23.63	C2	30.33	C3	27.49	C1	23.67	C2	30.21	C3	27.29	C1	23.79	C2	30.19	C3	27.32
spl.109	C1	23.86	C2	30.03	C3	26.74	C1	23.62	C2	30.12	C3	26.67	C1	23.75	C2	30.22	C3	27.56	C1	23.68	C2	30.23	C3	27.33	C1	23.84	C2	30.27	C3	27.42
spl.109	PR1	25.09	PR1	24.94	PR1	25	PR2	25.94	PR2	26.01	PR2	25.91	PR3	28.2	PR3	28.52	PR3	28.64	PC1	22.65	PC1	22.74	PC1	22.91	PC2	26.62	PC2	26.76	PC2	26.82
spl.109	PR1	25.1	PR1	24.99	PR1	24.98	PR2	26.04	PR2	26.1	PR2	26.14	PR3	28.26	PR3	28.71	PR3	28.66	PC1	22.66	PC1	22.82	PC1	23	PC2	26.7	PC2	26.85	PC2	26.85
spl.109	PR1	25.11	PR1	25	PR1	24.93	PR2	26.06	PR2	26.16	PR2	26.29	PR3	28.26	PR3	28.74	PR3	28.75	PC1	22.74	PC1	22.82	PC1	23.04	PC2	26.74	PC2	26.9	PC2	26.95
spl.110	C1	25.05	C2	30	C3	27.29	C1	24.65	C2	30.17	C3	27.2	C1	24.78	C2	30.29	C3	27.89	C1	24.57	C2	29.97	C3	28.81	C1	24.63	C2	29.68	C3	28.11
spl.110	C1	25.13	C2	30.14	C3	27.29	C1	24.7	C2	30.2	C3	27.31	C1	24.8	C2	30.56	C3	28.02	C1	24.59	C2	30.1	C3	28.87	C1	24.68	C2	29.76	C3	28.16
spl.110	C1	25.65	C2	30.53	C3	27.84	C1	25.41	C2	30.58	C3	27.7	C1	25.4	C2	30.23	C3	28.75	C1	25	C2	30.61	C3	28.94	C1	25.12	C2	30.46	C3	29.5
spl.110	PR1	27.13	PR1	26.77	PR1	26.72	PR2	28.2	PR2	28.08	PR2	28.11	PR3	30.03	PR3	30.08	PR3	30.28	PC1	21.43	PC1	21.57	PC1	21.62	PC2	25.85	PC2	25.88	PC2	26.13
spl.110	PR1	27.21	PR1	26.93	PR1	26.84	PR2	28.23	PR2	28.11	PR2	28.16	PR3	30.09	PR3	30.39	PR3	30.41	PC1	21.46	PC1	21.57	PC1	21.71	PC2	25.88	PC2	25.9	PC2	26.18
spl.110	PR1	28.5	PR1	28.21	PR1	28.24	PR2	29.31	PR2	28.96	PR2	28.95	PR3	30.86	PR3	31	PR3	31.23	PC1	22.84	PC1	23.2	PC1	21.72	PC2	26.79	PC2	26.99	PC2	27.15
spl.111	C1	26.23	C2	30.89	C3	28.03	C1	25.89	C2	31.06	C3	28.01	C1	26.05	C2	31	C3	28.86	C1	25.56	C2	30.84	C3	28.47	C1	25.75	C2	30.76	C3	28.94
spl.111	C1	26.25	C2	30.92	C3	28.04	C1	25.97	C2	31.06	C3	28.03	C1	26.07	C2	31.1	C3	28.87	C1	25.66	C2	30.87	C3	28.48	C1	25.77	C2	30.83	C3	29.02
spl.111	C1	26.26	C2	31.01	C3	28.06	C1	25.97	C2	31.09	C3	28.04	C1	26.11	C2	31.25	C3	28.92	C1	25.74	C2	30.91	C3	28.61	C1	25.85	C2	30.94	C3	29.02
spl.111	PR1	26.84	PR1	26.6	PR1	26.56	PR2	28.53	PR2	28.4	PR2	28.32	PR3	30.22	PR3	30.51	PR3	30.37	PC1	22	PC1	22.12	PC1	22.32	PC2	26.58	PC2	26.63	PC2	26.77
spl.111	PR1	26.85	PR1	26.68	PR1	26.66	PR2	28.63	PR2	28.4	PR2	28.45	PR3	30.25	PR3	30.33	PR3	30.47	PC1	22.06	PC1	22.21	PC1	22.37	PC2	26.61	PC2	26.67	PC2	26.81
spl.111	PR1	26.92	PR1	26.7	PR1	26.66	PR2	28.65	PR2	28.43	PR2	28.5	PR3	30.25	PR3	30.31	PR3	30.52	PC1	22.17	PC1	22.22	PC1	22.56	PC2	26.68	PC2	26.68	PC2	26.81
spl.112	C1	24.69	C2	30.53	C3	26.53	C1	24.34	C2	30.75	C3	26.59	C1	24.37	C2	30.82	C3	27.12	C1	24.26	C2	22.69	C3	26.61	C1	24.38	C2	30.67	C3	27.02
spl.112	C1	24.72	C2	30.75	C3	26.57	C1	24.44	C2	30.85	C3	26.62	C1	24.48	C2	30.88	C3	27.29	C1	24.45	C2	30.66	C3	26.98	C1	24.49	C2	30.84	C3	27.28
spl.112	C1	24.84	C2	30.8	C3	26.59	C1	24.45	C2	30.92	C3	26.66	C1	24.55	C2	30.91	C3	27.29	C1	24.51	C2	31.02	C3	27.03	C1	24.56	C2	30.88	C3	27.29
spl.112	PR1	27.29	PR1	27.05	PR1	27.06	PR2	28.32	PR2	28.46	PR2	28.66	PR3	30.28	PR3	30.57	PR3	30.64	PC1	24.94	PC1	24.71	PC1	25.15	PC2	29.08	PC2	29.34	PC2	29.32
spl.112	PR1	27.32	PR1	27.08	PR1	27.08	PR2	28.52	PR2	28.52	PR2	28.73	PR3	30.29	PR3	30.63	PR3	30.66	PC1	24.96	PC1	25.01	PC1	25.19	PC2	29.27	PC2	29.41	PC2	29.55
spl.112	PR1	27.38	PR1	27.15	PR1	27.16	PR2	28.58	PR2	28.71	PR2	28.73	PR3	30.36	PR3	30.6	PR3	30.76	PC1	25.05	PC1	25.25	PC1	25.43	PC2	29.33	PC2	29.45	PC2	29.59
spl.114	C1	26.42	C2	30.66	C3	28.7	C1	26.31	C2	30.76	C3	28.85	C1	26.2	C2	30.88	C3	29.59	C1	25.9	C2	30.35	C3	28.71	C1	26.11	C2	30.36	C3	29.37
spl.114	C1	26.63	C2	30.84	C3	28.84	C1	26.38	C2	31.14	C3	28.95	C1	26.21	C2	30.89	C3	29.63	C1	25.96	C2	30.52	C3	28.86	C1	26.19	C2	30.39	C3	29.46
spl.114	C1	26.67	C2	31.01	C3	28.9	C1	26.53	C2	31.17	C3	28.98	C1	26.45	C2	30.97	C3	29.74	C1	26.01	C2	30.7	C3	28.96	C1	26.36	C2	30.44	C3	29.56
spl.114	PR1	29.21	PR1	28.84	PR1	28.87	PR2	31.63	PR2	31.16	PR2	31.5	PR3	33.09	PR3	33.16	PR3	33.13	PC1	23.22	PC1	23.18	PC1	23.24	PC2	27.62	PC2	27.48	PC2	27.61
spl.114	PR1	29.28	PR1	29.06	PR1	29.02	PR2	31.74	PR2	31.27	PR2	31.51	PR3	33.31	PR3	33.01	PR3	33.41	PC1	23.3	PC1	23.23	PC1	23.4	PC2	27.68	PC2	27.56	PC2	27.66
spl.114	PR1	29.35	PR1	29.11	PR1	29.09	PR2	31.79	PR2	31.32	PR2	31.54	PR3	33.52	PR3	33.2	PR3	33.53	PC1	23.31	PC1	23.37	PC1	23.42	PC2	27.76	PC2	27.59	PC2	27.73
spl.115	C1	24.85	C2	29.85	C3	27.04	C1	24.64	C2	29.9	C3	26.95	C1	24.55	C2	30.12	C3	27.54	C1	24.42	C2	29.65	C3	27.12	C1	24.41	C2	29.89	C3	27.48
spl.115	C1	24.89	C2	29.86	C3	27.07	C1	24.67	C2	30.01	C3	27.01	C1	24.73	C2	30.16	C3	27.6	C1	24.44	C2	29.82	C3	27.25	C1	24.48	C2	29.98	C3	27.48
spl.115	C1	24.96	C2	29.98	C3	27.08	C1	24.69	C2	30.03	C3	27.11	C1	24.73	C2	30.15	C3	27.6	C1	24.47	C2	29.87	C3	27.35	C1	24.53	C2	30	C3	27.56
spl.115	PR1	27.77	PR1	27.37	PR1	27.51	PR2	29.35	PR2	28.9	PR2	29.06	PR3	31.18	PR3	31.43	PR3	31.11	PC1	21.87	PC1	22.01	PC1	22.04	PC2	26.06	PC2	26.3	PC2	26.18
spl.115	PR1	27.88	PR1	27.48	PR1	27.55	PR2	29.42	PR2	28.98	PR2	29.1	PR3	31.3	PR3	31.17	PR3	31.15	PC1	21.9	PC1	22.11	PC1	22.05	PC2	26.12	PC2	26.3	PC2	26.19
spl.115	PR1	28.19	PR1	27.5	PR1	27.56	PR2	29.42	PR2	29.11	PR2	29.1	PR3	31.32	PR3	31.12	PR3	31.28	PC1	21.92	PC1	22.15	PC1	22.18	PC2	26.13	PC2	26.41	PC2	26.21
spl.117	C1	24.16	C2	29.73	C3	25.46	C1	23.79	C2	29.68	C3	25.4	C1	23.82	C2	30.06	C3	25.98	C1	23.54	C2	29.92	C3	25.53	C1	23.65	C2	30.08	C3	26.15
spl.117	C1	24.24	C2	29.87	C3	25.5	C1	23.87	C2	30	C3	25.47	C1	23.91	C2	30.01	C3	26.02	C1	23.64	C2	30.07	C3	25.76	C1	23.65	C2	30.55	C3	26.26
spl.117	C1	24.24	C2	30	C3	25.55	C1	23.86	C2	30.04	C3	25.55	C1	23.92	C2	29.97	C3	26.12	C1	23.69	C2	30.09	C3	25.86	C1	23.76	C2	30.79	C3	26.27
spl.117	PR1	25.88	PR1	25.48	PR1	25.45	PR2	26.93	PR2	26.52	PR2	26.69	PR3	28.83	PR3	29.05	PR3	28.9	PC1	20.37	PC1	20.48	PC1	20.51	PC2	24.3	PC2	24.41	PC2	24.37
spl.117	PR1	25.92	PR1	25.52	PR1	25.46	PR2	26.98	PR2	26.69	PR2	26.71	PR3	28.85	PR3	29.02	PR3	28.98	PC1	20.4	PC1	20.5	PC1	20.59	PC2	24.31	PC2	24.45	PC2	24.44
spl.117	PR1	25.93	PR1	25.57	PR1	25.5	PR2	27.03	PR2	26.69	PR2	26.79	PR3	28.92	PR3	29	PR3	28.98	PC1	20.41	PC1	20.74	PC1	20.65	PC2	24.33	PC2	24.46	PC2	24.52
spl.118	C1	24.22	C2	29.84	C3	26.29	C1	24.11	C2	30.02	C3	26.11	C1	24.21	C2	30.13	C3	26.86	C1	24.02	C2	30.05	C3	26.74	C1	24.07	C2	30.08	C3	26.87
spl.118	C1	24.44	C2	29.89	C3	26.31	C1	24.23	C2	30.13	C3	26.24	C1	24.22	C2	30.01	C3	26.98	C1	24.15	C2	30.07	C3	26.82	C1	24.24	C2	30.16	C3	26.9
spl.118	C1	24.47	C2	30.03	C3	26.32	C1	24.27	C2	30.14	C3	26.31	C1	24.23	C2	29.85	C3	26.99	C1	24.17	C2	30.2	C3	26.9	C1	24.34	C2	30.19	C3	26.91
spl.118	PR1	25.22	PR1	24.74	PR1	24.68	PR2	26.09	PR2	25.79	PR2	25.65	PR3	27.94	PR3	28.14	PR3	28.02	PC1	23.33	PC1	23.23	PC1	23.44	PC2	27.31	PC2	27.38	PC2	27.42
spl.118	PR1	25.26	PR1	24.86	PR1	24.84	PR2	26.26	PR2	25.95	PR2	25.96	PR3	27.99	PR3	27.92	PR3	28.04	PC1	23.37	PC1	23.33	PC1	23.64	PC2	27.43	PC2	27.43	PC2	27.51
spl.118	PR1	25.3	PR1	24.96	PR1	24.97	PR2	26.29	PR2	25.99	PR2	25.98	PR3	28.05	PR3	28.08	PR3	28.13	PC1	23.5	PC1	23.58	PC1	23.7	PC2	27.48	PC2	27.46	PC2	27.54
spl.119	C1	26.67	C2	31.17	C3	29.61	C1	26.6	C2	31.32	C3	29.77	C1	26.47	C2	31.51	C3	30.43	C1	26.02	C2	30.89	C3	29.97	C1	26.11	C2	30.99	C3	31.33
spl.119	C1	26.69	C2	31.24	C3	29.7	C1	26.64	C2	31.32	C3	29.86	C1	26.53	C2	31.49	C3	30.53	C1	26.1	C2	31.07	C3	30.02	C1	26.14	C2	31.04	C3	31.44
spl.119	C1	26.73	C2	31.27	C3	29.72	C1	26.69	C2	31.41	C3	29.88	C1	26.53	C2	31.35	C3	30.54	C1	26.16	C2	31.11	C3	30.32	C1	26.17	C2	31.27	C3	31.78
spl.119	PR1	28.8	PR1	28.46	PR1	28.44	PR2	32.06	PR2	31.48	PR2	31.77	PR3	33.53	PR3	33.68	PR3	33.8	PC1	22.34	PC1	22.36	PC1	22.38	PC2	26.99	PC2	27.1	PC2	27.01
spl.119	PR1	28.81	PR1	28.49	PR1	28.54	PR2	32.31	PR2	31.58	PR2	31.89	PR3	33.73	PR3	33.6	PR3	33.83	PC1	22.38	PC1	22.36	PC1	22.51	PC2	27.01	PC2	27.25	PC2	27.14
spl.119	PR1	28.83	PR1	28.51	PR1	28.6	PR2	32.35	PR2	31.66	PR2	32.18	PR3	33.88	PR3	33.33	PR3	33.91	PC1	22.38	PC1	22.38	PC1	22.76	PC2	27.02	PC2	27.27	PC2	27.15
spl.116b	C1	24.99	C2	30.29	C3	26.89	C1	24.71	C2	30.54	C3	26.7	C1	24.79	C2	30.8	C3	27.49	C1	24.41	C2	30.48	C3	27.06	C1	24.45	C2	30.8	C3	27.6
spl.116b	C1	25.02	C2	30.43	C3	26.92	C1	24.66	C2	30.54	C3	26.81	C1	24.82	C2	30.58	C3	27.49	C1	24.48	C2	30.71	C3	27.2	C1	24.48	C2	31.1	C3	27.71
spl.116b	C1	25.15	C2	30.49	C3	27.06	C1	24.92	C2	30.58	C3	26.86	C1	24.91	C2	30.43	C3	27.51	C1	24.53	C2	30.79	C3	27.27	C1	24.63	C2	31.19	C3	27.78
spl.116b	PR1	26.11	PR1	25.79	PR1	25.81	PR2	27.38	PR2	27.07	PR2	27.06	PR3	29.33	PR3	29.42	PR3	29.4	PC1	20.82	PC1	20.88	PC1	20.93	PC2	25.39	PC2	25.6	PC2	25.46
spl.116b	PR1	26.11	PR1	25.8	PR1	25.87	PR2	27.32	PR2	27.1	PR2	27.22	PR3	29.36	PR3	29.37	PR3	29.45	PC1	20.83	PC1	20.91	PC1	20.99	PC2	25.5	PC2	25.62	PC2	25.48
spl.116b	PR1	26.23	PR1	25.83	PR1	25.91	PR2	27.52	PR2	27.13	PR2	27.23	PR3	29.43	PR3	29.42	PR3	29.47	PC1	20.87	PC1	20.94	PC1	21.08	PC2	25.51	PC2	25.73	PC2	25.62
spl.33b	C1	25.76	C2	31.51	C3	28.02	C1	25.99	C2	31.28	C3	28.31	C1	25.97	C2	31.73	C3	27.9	C1	25.88	C2	31.09	C3	27.99	C1	26.31	C2	31.28	C3	27.77
spl.33b	C1	25.88	C2	31.32	C3	27.99	C1	26.06	C2	31.37	C3	27.96	C1	26.09	C2	31.26	C3	27.63	C1	25.91	C2	31.41	C3	27.71	C1	26.31	C2	31.36	C3	27.51
spl.33b	C1	25.77	C2	31.51	C3	27.65	C1	26.07	C2	31.41	C3	27.93	C1	26.02	C2	31.38	C3	27.69	C1	25.96	C2	31.29	C3	27.69	C1	26.28	C2	31.59	C3	27.54
spl.33b	PR1	26.72	PR1	27.24	PR1	27.3	PR2	28.52	PR2	28.89	PR2	29.07	PR3	30.38	PR3	31.18	PR3	31.25	PC1	24.82	PC1	25.22	PC1	25.62	PC2	29.58	PC2	29.91	PC2	29.79
spl.33b	PR1	26.87	PR1	26.92	PR1	27.36	PR2	28.57	PR2	28.96	PR2	29.12	PR3	30.32	PR3	30.78	PR3	31.14	PC1	24.92	PC1	25.32	PC1	25.52	PC2	29.66	PC2	29.92	PC2	29.73
spl.33b	PR1	26.8	PR1	27	PR1	27.28	PR2	28.51	PR2	29.14	PR2	29.03	PR3	30.33	PR3	31.11	PR3	31.15	PC1	24.92	PC1	25.26	PC1	25.64	PC2	29.71	PC2	29.98	PC2	29.7
spl.34d	C1	27.07	C2	32.21	C3	27.51	C1	27.34	C2	32.4	C3	27.79	C1	27.43	C2	32.17	C3	27.4	C1	27.17	C2	32.1	C3	27.76	C1	27.41	C2	31.89	C3	27.33
spl.34d	C1	27.01	C2	31.99	C3	27.23	C1	27.29	C2	32.34	C3	27.57	C1	27.37	C2	32.43	C3	27.18	C1	27.03	C2	31.86	C3	27.28	C1	27.5	C2	31.96	C3	27.13
spl.34d	C1	27.02	C2	32.24	C3	27.42	C1	27.27	C2	31.93	C3	27.52	C1	27.36	C2	31.96	C3	27.2	C1	27.47	C2	32	C3	27.42	C1	27.62	C2	32	C3	27.07
spl.34d	PR1	28.2	PR1	28.59	PR1	28.5	PR2	30.65	PR2	30.81	PR2	30.89	PR3	31.72	PR3	32.22	PR3	32.47	PC1	24.79	PC1	25.08	PC1	25.68	PC2	29.19	PC2	29.6	PC2	29.41
spl.34d	PR1	28.11	PR1	28.44	PR1	28.6	PR2	30.71	PR2	30.96	PR2	31.01	PR3	31.65	PR3	32.29	PR3	32.44	PC1	24.66	PC1	25.07	PC1	25.36	PC2	29.25	PC2	29.61	PC2	29.42
spl.34d	PR1	28.29	PR1	28.5	PR1	28.82	PR2	30.61	PR2	30.58	PR2	31.11	PR3	31.61	PR3	32.38	PR3	32.2	PC1	25.07	PC1	25.01	PC1	25.61	PC2	29.36	PC2	29.54	PC2	29.55
spl.36b	C1	27.49	C2	32.97	C3	28.96	C1	27.59	C2	32.69	C3	29.24	C1	27.8	C2	32.59	C3	28.77	C1	27.42	C2	32.36	C3	28.83	C1	27.74	C2	32.44	C3	27.71
spl.36b	C1	27.4	C2	32.18	C3	28.73	C1	27.78	C2	32.49	C3	28.99	C1	27.78	C2	32.79	C3	28.64	C1	27.47	C2	32.26	C3	28.81	C1	27.77	C2	32.12	C3	28.43
spl.36b	C1	27.53	C2	32.37	C3	28.83	C1	27.95	C2	32.96	C3	29.13	C1	27.63	C2	32.23	C3	28.74	C1	27.48	C2	32.47	C3	28.68	C1	27.88	C2	32.43	C3	28.38
spl.36b	PR1	28.25	PR1	28.56	PR1	28.65	PR2	30.48	PR2	31.13	PR2	31.26	PR3	31.49	PR3	32.01	PR3	32.24	PC1	24.11	PC1	24.69	PC1	24.82	PC2	28.49	PC2	29.11	PC2	28.58
spl.36b	PR1	28.22	PR1	28.59	PR1	28.72	PR2	30.68	PR2	30.64	PR2	31.13	PR3	31.49	PR3	32.35	PR3	32.12	PC1	24.2	PC1	24.45	PC1	24.87	PC2	28.59	PC2	28.81	PC2	28.78
spl.36b	PR1	28.34	PR1	28.48	PR1	28.89	PR2	30.73	PR2	31.18	PR2	31.22	PR3	31.23	PR3	32.08	PR3	32.65	PC1	24.23	PC1	24.67	PC1	24.87	PC2	28.64	PC2	28.97	PC2	28.84
