# Supplementary material for: Dysregulation of the PRUNE2/PCA3 genetic axis in human prostate cancer: from experimental discovery to validation in two independent patient cohorts
Source: eLife journal article supplement (doi:10.7554/elife.81929), 2023-01-16
Supplement: supp [file elife-81929-supp-v1.zip › elife_poa_e81929_Figure_1_source_data_2.csv]

Sample.ID	PR1C1	PR1C1.Cq	PR1C2	PR1C2.Cq	PR1C3	PR1C3.Cq	PR2C1	PR2C1.Cq	PR2C2	PR2C2.Cq	PR2C3	PR2C3Cq	PR3C1	PR3C1.Cq	PR3C2	PR3C2.Cq	PR3C3	PR3C3.Cq	PC1C1	PC1C1.Cq	PC1C2	PC1C2.Cq	PC1C3	PC1C3.Cq	PC2C1	PC2C1.Cq	PC2C2	PC2C2.Cq	PC2C3	PC2C3.Cq
spl.120	C1	24.92	C2	30.18	C3	26.46	C1	24.97	C2	30.36	C3	26.79	C1	24.86	C2	30.81	C3	26.8	C1	24.87	C2	30.62	C3	26.97	C1	24.88	C2	30.74	C3	26.89
spl.120	C1	25.07	C2	30.36	C3	26.1	C1	24.88	C2	30.36	C3	26.48	C1	24.76	C2	31.04	C3	26.53	C1	24.77	C2	30.73	C3	26.6	C1	24.91	C2	30.86	C3	26.62
spl.120	C1	25.11	C2	30.4	C3	26.21	C1	24.94	C2	30.45	C3	26.43	C1	24.88	C2	31.02	C3	26.55	C1	24.79	C2	30.79	C3	26.55	C1	24.87	C2	30.84	C3	26.67
spl.120	PR1	26.06	PR1	25.84	PR1	25.94	PR2	27.4	PR2	27.22	PR2	27.2	PR3	29.26	PR3	29.69	PR3	29.31	PC1	29.51	PC1	29.78	PC1	29.84	PC2	33.75	PC2	33.86	PC2	33.85
spl.120	PR1	26.08	PR1	25.81	PR1	25.8	PR2	27.36	PR2	27.23	PR2	27.22	PR3	29.29	PR3	30.01	PR3	29.24	PC1	29.26	PC1	29.56	PC1	29.45	PC2	34.46	PC2	34.13	PC2	34.15
spl.120	PR1	26.18	PR1	25.94	PR1	25.94	PR2	27.54	PR2	27.34	PR2	27.27	PR3	29.32	PR3	29.97	PR3	29.26	PC1	29.44	PC1	29.65	PC1	29.55	PC2	34.05	PC2	33.96	PC2	34.22
spl.121	C1	26.58	C2	31.19	C3	29.03	C1	26.38	C2	31.37	C3	29.44	C1	26.34	C2	31.88	C3	29.4	C1	26.37	C2	31.75	C3	29.54	C1	26.32	C2	31.45	C3	29.07
spl.121	C1	26.53	C2	31.44	C3	28.83	C1	26.66	C2	31.74	C3	29.26	C1	26.39	C2	32.3	C3	29.32	C1	26.43	C2	31.53	C3	29.34	C1	26.55	C2	31.84	C3	28.82
spl.121	C1	26.42	C2	31.51	C3	28.76	C1	26.39	C2	31.56	C3	29.09	C1	26.23	C2	32.2	C3	29.11	C1	26.36	C2	31.82	C3	29.23	C1	26.47	C2	31.67	C3	30.27
spl.121	PR1	27.39	PR1	27.15	PR1	27.24	PR2	30.35	PR2	30.08	PR2	30.18	PR3	31.74	PR3	32.29	PR3	31.74	PC1	26.08	PC1	26.48	PC1	26.59	PC2	30.85	PC2	30.96	PC2	30.36
spl.121	PR1	27.35	PR1	27.11	PR1	27.23	PR2	30.42	PR2	30.33	PR2	30.3	PR3	31.85	PR3	32.37	PR3	32.11	PC1	26.12	PC1	26.28	PC1	26.51	PC2	31.08	PC2	31.25	PC2	30.59
spl.121	PR1	27.28	PR1	27.21	PR1	27.27	PR2	30.53	PR2	30.15	PR2	30.22	PR3	31.71	PR3	32.61	PR3	31.99	PC1	26.09	PC1	26.2	PC1	26.58	PC2	31.09	PC2	31	PC2	31.65
spl.122	C1	27.51	C2	32.05	C3	28.53	C1	27.57	C2	32.41	C3	29.01	C1	27.55	C2	32.57	C3	28.92	C1	27.47	C2	32.35	C3	28.98	C1	27.51	C2	32.23	C3	28.92
spl.122	C1	27.64	C2	32.03	C3	28.36	C1	27.51	C2	32.31	C3	28.7	C1	27.54	C2	32.73	C3	28.7	C1	27.41	C2	32.47	C3	28.74	C1	27.36	C2	32.34	C3	28.64
spl.122	C1	27.41	C2	32.3	C3	28.25	C1	27.55	C2	32.32	C3	28.69	C1	27.43	C2	32.86	C3	28.7	C1	27.44	C2	32.39	C3	28.98	C1	27.53	C2	32.62	C3	28.53
spl.122	PR1	27.52	PR1	27.18	PR1	27.29	PR2	29.73	PR2	29.63	PR2	29.76	PR3	30.72	PR3	31.45	PR3	30.96	PC1	27.72	PC1	27.97	PC1	27.73	PC2	32.25	PC2	32.18	PC2	32.14
spl.122	PR1	27.37	PR1	27.13	PR1	27.29	PR2	29.83	PR2	29.63	PR2	29.63	PR3	30.82	PR3	31.68	PR3	30.95	PC1	27.63	PC1	27.62	PC1	27.77	PC2	32.02	PC2	32.35	PC2	32.1
spl.122	PR1	27.43	PR1	27.23	PR1	27.18	PR2	29.87	PR2	29.64	PR2	29.58	PR3	30.69	PR3	31.28	PR3	30.97	PC1	27.65	PC1	27.61	PC1	27.99	PC2	32.06	PC2	31.91	PC2	31.91
spl.123	C1	27.69	C2	31.79	C3	28.92	C1	27.7	C2	31.82	C3	29.52	C1	27.7	C2	32.5	C3	28.98	C1	27.7	C2	32.21	C3	30.07	C1	27.75	C2	32.16	C3	29.51
spl.123	C1	27.83	C2	31.8	C3	28.8	C1	28.05	C2	32.16	C3	29.1	C1	27.81	C2	32.61	C3	29.03	C1	27.7	C2	32.42	C3	29.31	C1	27.89	C2	32.3	C3	29.23
spl.123	C1	27.8	C2	32.11	C3	28.7	C1	27.78	C2	31.96	C3	29.06	C1	27.88	C2	32.54	C3	29.43	C1	27.78	C2	32.39	C3	29.18	C1	27.79	C2	32.45	C3	29.14
spl.123	PR1	27.89	PR1	27.76	PR1	27.83	PR2	30.58	PR2	30.43	PR2	30.47	PR3	31.68	PR3	32.2	PR3	31.52	PC1	31.34	PC1	31.73	PC1	32.67	PC2	36.42	PC2	36.44	PC2	36.27
spl.123	PR1	28.02	PR1	27.72	PR1	27.85	PR2	30.6	PR2	30.51	PR2	30.41	PR3	31.67	PR3	32.26	PR3	31.51	PC1	31.93	PC1	31.86	PC1	31.99	PC2	36.68	PC2	36.72	PC2	36.19
spl.123	PR1	27.99	PR1	27.73	PR1	27.78	PR2	30.78	PR2	30.29	PR2	30.45	PR3	31.64	PR3	32.24	PR3	31.76	PC1	31.83	PC1	31.9	PC1	31.89	PC2	36.54	PC2	36.01	PC2	36.57
spl.124	C1	27.92	C2	32	C3	28.26	C1	27.84	C2	32.11	C3	29.28	C1	27.79	C2	32.28	C3	29.05	C1	27.63	C2	32.29	C3	30.13	C1	27.7	C2	32.61	C3	28.98
spl.124	C1	27.77	C2	32.02	C3	28.79	C1	27.96	C2	32.41	C3	29.06	C1	27.72	C2	32.57	C3	29.07	C1	27.77	C2	32.53	C3	29.09	C1	27.86	C2	32.66	C3	28.57
spl.124	C1	27.82	C2	32.27	C3	28.69	C1	27.71	C2	32.3	C3	28.83	C1	27.7	C2	32.53	C3	28.99	C1	27.71	C2	32.7	C3	28.96	C1	27.8	C2	32.36	C3	28.68
spl.124	PR1	27.55	PR1	27.13	PR1	27.26	PR2	29.52	PR2	29.22	PR2	29.41	PR3	30.56	PR3	30.52	PR3	30.56	PC1	27.54	PC1	27.64	PC1	28.49	PC2	32.12	PC2	32.18	PC2	31.69
spl.124	PR1	27.23	PR1	27.06	PR1	27.18	PR2	29.49	PR2	29.3	PR2	29.3	PR3	30.56	PR3	31.06	PR3	30.6	PC1	27.53	PC1	27.44	PC1	27.62	PC2	32.04	PC2	32.26	PC2	31.48
spl.124	PR1	27.26	PR1	27	PR1	27.26	PR2	29.43	PR2	29.44	PR2	29.04	PR3	30.5	PR3	30.79	PR3	30.63	PC1	27.32	PC1	27.35	PC1	27.58	PC2	32.09	PC2	31.91	PC2	31.44
spl.125	C1	26.9	C2	31.23	C3	28.35	C1	27.36	C2	31.47	C3	28.74	C1	27.35	C2	32.61	C3	28.24	C1	26.89	C2	31.61	C3	28.57	C1	26.83	C2	NA	C3	28.75
spl.125	C1	26.85	C2	31.18	C3	28.25	C1	26.81	C2	31.38	C3	28.67	C1	26.72	C2	32.19	C3	28.43	C1	26.98	C2	31.89	C3	28.74	C1	27.59	C2	NA	C3	28.44
spl.125	C1	26.68	C2	32.05	C3	28.04	C1	26.7	C2	31.29	C3	28.32	C1	26.67	C2	31.89	C3	28.38	C1	27.58	C2	31.7	C3	28.56	C1	27.7	C2	NA	C3	29.93
spl.125	PR1	27.61	PR1	27.39	PR1	27.64	PR2	30.49	PR2	29.64	PR2	29.66	PR3	31.73	PR3	32.1	PR3	31.13	PC1	32.55	PC1	32.95	PC1	32.36	PC2	36.82	PC2	NA	PC2	36.87
spl.125	PR1	27.78	PR1	27.43	PR1	27.56	PR2	29.98	PR2	29.86	PR2	29.82	PR3	31	PR3	31.8	PR3	31.03	PC1	32.2	PC1	32.45	PC1	32.63	PC2	37.62	PC2	NA	PC2	36.49
spl.125	PR1	27.75	PR1	27.94	PR1	27.6	PR2	29.79	PR2	29.55	PR2	29.57	PR3	30.69	PR3	31.62	PR3	30.92	PC1	33.09	PC1	32.3	PC1	32.25	PC2	37.29	PC2	NA	PC2	37.41
spl.126	C1	26.86	C2	31.33	C3	27.52	C1	27	C2	31.47	C3	28.06	C1	27	C2	32.09	C3	28.01	C1	27.06	C2	31.9	C3	28.08	C1	26.98	C2	32.06	C3	28.33
spl.126	C1	27.16	C2	31.65	C3	27.89	C1	27.16	C2	31.86	C3	28.24	C1	27.04	C2	32.16	C3	28.29	C1	27.1	C2	32.15	C3	28.32	C1	27.16	C2	31.89	C3	28.4
spl.126	C1	27.22	C2	31.46	C3	27.87	C1	27.28	C2	31.54	C3	28.26	C1	27.07	C2	32.1	C3	28.13	C1	27.17	C2	31.8	C3	28.26	C1	27.11	C2	31.99	C3	28.28
spl.126	PR1	27.16	PR1	26.98	PR1	26.93	PR2	29.25	PR2	29.17	PR2	29.2	PR3	30.41	PR3	30.99	PR3	30.32	PC1	29.09	PC1	29.26	PC1	28.98	PC2	33.58	PC2	33.67	PC2	33.43
spl.126	PR1	27.32	PR1	27.18	PR1	27.12	PR2	29.5	PR2	29.38	PR2	29.24	PR3	30.52	PR3	31.18	PR3	30.54	PC1	29.15	PC1	29.23	PC1	29.14	PC2	33.56	PC2	33.71	PC2	33.84
spl.126	PR1	27.42	PR1	27.11	PR1	27.2	PR2	29.6	PR2	29.25	PR2	29.29	PR3	30.44	PR3	31.06	PR3	30.41	PC1	29	PC1	29.22	PC1	29.29	PC2	33.69	PC2	33.45	PC2	33.64
spl.127	C1	26.02	C2	30.73	C3	27.41	C1	25.97	C2	30.9	C3	27.61	C1	25.91	C2	31.38	C3	27.61	C1	25.91	C2	30.94	C3	27.55	C1	25.82	C2	31.01	C3	27.73
spl.127	C1	25.97	C2	30.81	C3	27.35	C1	25.96	C2	30.73	C3	27.7	C1	25.91	C2	31.35	C3	27.66	C1	25.86	C2	30.86	C3	27.8	C1	25.81	C2	31.2	C3	27.67
spl.127	C1	25.9	C2	30.54	C3	27.33	C1	25.96	C2	30.47	C3	27.63	C1	25.85	C2	31.12	C3	27.51	C1	25.68	C2	30.89	C3	27.79	C1	25.77	C2	30.89	C3	27.76
spl.127	PR1	27.14	PR1	26.83	PR1	27.07	PR2	28.84	PR2	28.59	PR2	28.48	PR3	30.03	PR3	30.84	PR3	30.16	PC1	28.47	PC1	28.75	PC1	28.77	PC2	33.18	PC2	32.81	PC2	32.99
spl.127	PR1	27.04	PR1	26.91	PR1	26.93	PR2	28.81	PR2	28.61	PR2	28.56	PR3	30.08	PR3	31.01	PR3	30.22	PC1	28.45	PC1	28.57	PC1	28.82	PC2	33.04	PC2	33.22	PC2	32.72
spl.127	PR1	27.22	PR1	26.95	PR1	26.92	PR2	28.77	PR2	28.16	PR2	28.59	PR3	30.32	PR3	30.73	PR3	30.06	PC1	28.39	PC1	28.67	PC1	28.9	PC2	33.13	PC2	32.93	PC2	32.76
spl.128	C1	27.6	C2	31.78	C3	28.7	C1	27.42	C2	31.96	C3	28.92	C1	27.44	C2	32.42	C3	28.84	C1	27.41	C2	32.28	C3	29.01	C1	27.49	C2	32.22	C3	29.08
spl.128	C1	27.44	C2	32.1	C3	28.55	C1	27.58	C2	32.05	C3	28.94	C1	27.53	C2	32.62	C3	29	C1	27.45	C2	32.2	C3	29.02	C1	27.46	C2	32.34	C3	29.12
spl.128	C1	27.57	C2	32.05	C3	28.57	C1	27.65	C2	32.04	C3	28.97	C1	27.55	C2	32.63	C3	28.94	C1	27.49	C2	32.15	C3	29.04	C1	27.37	C2	32.41	C3	30.36
spl.128	PR1	28.01	PR1	27.63	PR1	27.74	PR2	30.21	PR2	29.96	PR2	29.8	PR3	31.26	PR3	31.9	PR3	31.14	PC1	30.12	PC1	30.41	PC1	30.37	PC2	34.87	PC2	34.77	PC2	34.8
spl.128	PR1	27.96	PR1	27.86	PR1	27.8	PR2	30.26	PR2	30.09	PR2	30.07	PR3	31.32	PR3	31.88	PR3	31.29	PC1	30.13	PC1	30.38	PC1	30.56	PC2	35.23	PC2	34.73	PC2	34.97
spl.128	PR1	28.08	PR1	27.84	PR1	27.75	PR2	30.31	PR2	30.08	PR2	30.03	PR3	31.33	PR3	31.9	PR3	31.21	PC1	30.33	PC1	30.46	PC1	30.6	PC2	34.84	PC2	35.26	PC2	36.28
spl.129	C1	27.05	C2	31.47	C3	28.21	C1	27.14	C2	31.54	C3	28.44	C1	26.91	C2	31.73	C3	28.54	C1	26.62	C2	31.47	C3	28.55	C1	26.74	C2	31.59	C3	28.51
spl.129	C1	26.88	C2	31.48	C3	28.17	C1	27.01	C2	31.26	C3	28.32	C1	26.82	C2	31.98	C3	28.46	C1	26.73	C2	31.32	C3	28.45	C1	26.75	C2	31.51	C3	28.28
spl.129	C1	26.87	C2	31.48	C3	28.04	C1	27.01	C2	31.54	C3	28.34	C1	26.82	C2	31.85	C3	28.47	C1	26.73	C2	31.29	C3	28.32	C1	26.71	C2	31.57	C3	28.37
spl.129	PR1	27.53	PR1	27.09	PR1	27.26	PR2	29.79	PR2	29.37	PR2	29.31	PR3	30.87	PR3	31.26	PR3	30.84	PC1	26.15	PC1	26.28	PC1	26.31	PC2	30.75	PC2	30.83	PC2	30.91
spl.129	PR1	27.34	PR1	27.18	PR1	27.17	PR2	29.51	PR2	29.14	PR2	29.16	PR3	30.76	PR3	31.35	PR3	30.74	PC1	26.12	PC1	26.21	PC1	26.31	PC2	30.84	PC2	30.83	PC2	30.7
spl.129	PR1	27.55	PR1	27.15	PR1	27.21	PR2	29.59	PR2	29.38	PR2	29.15	PR3	30.83	PR3	31.27	PR3	30.81	PC1	26.32	PC1	26.17	PC1	26.4	PC2	30.7	PC2	30.92	PC2	30.78
spl.130	C1	25.03	C2	30.47	C3	26.22	C1	24.93	C2	30.51	C3	26.58	C1	24.82	C2	30.85	C3	26.45	C1	24.71	C2	30.77	C3	26.47	C1	24.89	C2	30.63	C3	26.47
spl.130	C1	25.02	C2	30.45	C3	26.21	C1	24.95	C2	30.51	C3	26.44	C1	24.85	C2	31.13	C3	26.45	C1	24.77	C2	30.5	C3	26.52	C1	24.88	C2	30.59	C3	26.53
spl.130	C1	25.16	C2	30.43	C3	26.13	C1	24.99	C2	30.52	C3	26.43	C1	24.91	C2	31.01	C3	26.52	C1	24.71	C2	30.72	C3	26.56	C1	24.87	C2	30.42	C3	26.61
spl.130	PR1	26.51	PR1	26.24	PR1	26.38	PR2	27.75	PR2	27.55	PR2	27.61	PR3	29.29	PR3	30.01	PR3	29.41	PC1	25.9	PC1	26.26	PC1	26.16	PC2	30.17	PC2	30.13	PC2	30.2
spl.130	PR1	26.5	PR1	26.38	PR1	26.33	PR2	27.69	PR2	27.59	PR2	27.5	PR3	29.26	PR3	29.92	PR3	29.34	PC1	25.93	PC1	26.06	PC1	26.27	PC2	30.18	PC2	30.17	PC2	30.09
spl.130	PR1	26.65	PR1	26.31	PR1	26.42	PR2	27.79	PR2	27.58	PR2	27.6	PR3	29.41	PR3	29.96	PR3	29.45	PC1	25.78	PC1	26.19	PC1	26.14	PC2	30.23	PC2	29.96	PC2	30.32
spl.131	C1	25.95	C2	30.91	C3	26.76	C1	25.76	C2	31.17	C3	27.19	C1	25.81	C2	31.57	C3	27.08	C1	25.71	C2	31.42	C3	27.07	C1	25.93	C2	31.4	C3	27.16
spl.131	C1	25.9	C2	30.78	C3	26.78	C1	25.9	C2	31.05	C3	27.05	C1	25.81	C2	31.63	C3	27.03	C1	25.79	C2	31.14	C3	27.09	C1	25.86	C2	31.27	C3	27.22
spl.131	C1	25.96	C2	31.57	C3	28.25	C1	26.48	C2	31.56	C3	27.58	C1	26.38	C2	32.2	C3	27.51	C1	26.5	C2	32.01	C3	27.73	C1	26.23	C2	31.69	C3	27.68
spl.131	PR1	26.76	PR1	26.49	PR1	26.53	PR2	28.41	PR2	28.32	PR2	28.18	PR3	30	PR3	30.4	PR3	30	PC1	30.53	PC1	30.95	PC1	30.93	PC2	36.15	PC2	35.92	PC2	36.09
spl.131	PR1	26.83	PR1	26.57	PR1	26.61	PR2	28.34	PR2	28.19	PR2	28.18	PR3	29.89	PR3	30.49	PR3	29.83	PC1	30.5	PC1	30.78	PC1	30.77	PC2	36.03	PC2	35.97	PC2	35.52
spl.131	PR1	26.9	PR1	26.99	PR1	27.23	PR2	29.54	PR2	29.4	PR2	29.14	PR3	30.78	PR3	31.53	PR3	30.6	PC1	30.64	PC1	31.2	PC1	32.19	PC2	36.64	PC2	36.99	PC2	36.58
spl.132	C1	26.65	C2	30.96	C3	27.74	C1	26.57	C2	31.41	C3	28.12	C1	26.52	C2	31.57	C3	28.1	C1	26.41	C2	31.3	C3	28.18	C1	26.44	C2	31.38	C3	28.07
spl.132	C1	26.62	C2	30.95	C3	27.64	C1	26.54	C2	31.18	C3	27.98	C1	26.47	C2	31.68	C3	27.98	C1	26.36	C2	31.42	C3	28.1	C1	26.29	C2	31.46	C3	28.03
spl.132	C1	26.69	C2	31	C3	27.66	C1	26.55	C2	31.05	C3	28.04	C1	26.53	C2	31.32	C3	28.02	C1	26.39	C2	31.18	C3	28.18	C1	26.38	C2	31.37	C3	28.2
spl.132	PR1	27.29	PR1	26.82	PR1	26.9	PR2	29.61	PR2	29.16	PR2	28.92	PR3	30.76	PR3	30.93	PR3	30.59	PC1	28.69	PC1	29.11	PC1	29.11	PC2	33.29	PC2	33.3	PC2	33.41
spl.132	PR1	27.34	PR1	26.88	PR1	26.92	PR2	29.46	PR2	28.96	PR2	28.98	PR3	30.67	PR3	31.05	PR3	30.31	PC1	28.9	PC1	29.06	PC1	29.2	PC2	33.85	PC2	33.5	PC2	33.1
spl.132	PR1	27.39	PR1	26.75	PR1	26.84	PR2	29.34	PR2	29.09	PR2	28.86	PR3	30.52	PR3	30.5	PR3	30.45	PC1	28.79	PC1	28.91	PC1	29.13	PC2	33.37	PC2	33.19	PC2	33.36
spl.133	C1	27.15	C2	31.46	C3	28.08	C1	27.07	C2	31.75	C3	28.41	C1	27.13	C2	31.99	C3	28.32	C1	26.92	C2	31.64	C3	28.66	C1	26.9	C2	31.36	C3	28.37
spl.133	C1	27.2	C2	31.51	C3	28.05	C1	27.14	C2	31.53	C3	28.41	C1	27.24	C2	32.26	C3	28.52	C1	27.1	C2	31.81	C3	28.58	C1	27.04	C2	31.82	C3	28.44
spl.133	C1	27.24	C2	31.62	C3	28.14	C1	27.28	C2	31.77	C3	28.4	C1	27.19	C2	32.03	C3	28.61	C1	27.19	C2	31.8	C3	28.61	C1	27.14	C2	31.92	C3	28.6
spl.133	PR1	26.93	PR1	26.7	PR1	26.63	PR2	29.2	PR2	28.85	PR2	28.54	PR3	30.55	PR3	30.95	PR3	30.22	PC1	28.58	PC1	28.58	PC1	28.94	PC2	33.64	PC2	33.32	PC2	33.09
spl.133	PR1	27.02	PR1	26.68	PR1	26.58	PR2	29.18	PR2	28.87	PR2	28.71	PR3	30.62	PR3	30.93	PR3	30.29	PC1	28.62	PC1	28.61	PC1	28.77	PC2	33.66	PC2	33.33	PC2	32.97
spl.133	PR1	27.08	PR1	26.81	PR1	26.64	PR2	29.28	PR2	28.95	PR2	28.78	PR3	30.66	PR3	30.91	PR3	30.49	PC1	28.61	PC1	28.68	PC1	28.85	PC2	33.62	PC2	33.39	PC2	33.15
spl.134	C1	28.86	C2	32.79	C3	29.86	C1	28.69	C2	32.46	C3	30	C1	28.72	C2	32.78	C3	30.05	C1	28.69	C2	32.49	C3	29.8	C1	28.46	C2	32.03	C3	29.74
spl.134	C1	28.83	C2	32.56	C3	29.71	C1	28.94	C2	32.21	C3	30.06	C1	28.76	C2	32.66	C3	30.06	C1	28.56	C2	32.36	C3	30.07	C1	28.77	C2	32.09	C3	30.01
spl.134	C1	29.06	C2	32.27	C3	29.72	C1	28.86	C2	32.14	C3	30.16	C1	28.83	C2	32.87	C3	30.21	C1	28.45	C2	32.42	C3	30.1	C1	28.73	C2	32.18	C3	30.02
spl.134	PR1	28.37	PR1	28.25	PR1	28.05	PR2	30.86	PR2	30.46	PR2	30.1	PR3	31.58	PR3	31.87	PR3	31.42	PC1	26.37	PC1	26.14	PC1	26.06	PC2	30.58	PC2	30.61	PC2	30.45
spl.134	PR1	28.29	PR1	27.97	PR1	27.77	PR2	30.78	PR2	30.37	PR2	30.12	PR3	31.68	PR3	31.91	PR3	31.42	PC1	26.29	PC1	26.24	PC1	26.21	PC2	31.02	PC2	30.59	PC2	30.72
spl.134	PR1	28.43	PR1	27.95	PR1	27.89	PR2	31.04	PR2	30.06	PR2	30.28	PR3	31.82	PR3	31.96	PR3	31.42	PC1	26.02	PC1	26.13	PC1	26.19	PC2	31.01	PC2	30.68	PC2	30.82
spl.135	C1	28.33	C2	31.88	C3	29.34	C1	28.34	C2	32.31	C3	29.74	C1	28.38	C2	32.62	C3	29.66	C1	28.32	C2	32.43	C3	29.94	C1	NA	C2	NA	C3	NA
spl.135	C1	28.37	C2	32.18	C3	29.21	C1	28.5	C2	32.29	C3	29.55	C1	28.21	C2	32.41	C3	29.61	C1	28.28	C2	32.49	C3	29.99	C1	NA	C2	NA	C3	NA
spl.135	C1	28.4	C2	32.31	C3	29.28	C1	28.46	C2	33.26	C3	29.61	C1	28.3	C2	33	C3	29.6	C1	28.34	C2	32.35	C3	29.92	C1	NA	C2	NA	C3	NA
spl.135	PR1	27.88	PR1	27.47	PR1	27.34	PR2	30.86	PR2	30.41	PR2	30.1	PR3	31.21	PR3	31.48	PR3	30.75	PC1	33.01	PC1	33.1	PC1	33.18	PC2	NA	PC2	NA	PC2	NA
spl.135	PR1	27.91	PR1	27.52	PR1	27.57	PR2	30.83	PR2	30.31	PR2	30.03	PR3	31.25	PR3	31.46	PR3	30.87	PC1	33.01	PC1	32.9	PC1	33.31	PC2	NA	PC2	NA	PC2	NA
spl.135	PR1	28.01	PR1	27.53	PR1	27.26	PR2	30.79	PR2	31.36	PR2	30.18	PR3	31.26	PR3	31.42	PR3	30.68	PC1	33.5	PC1	33.46	PC1	33.44	PC2	NA	PC2	NA	PC2	NA
spl.136	C1	30.79	C2	33.87	C3	30.59	C1	30.99	C2	34.24	C3	30.9	C1	30.66	C2	34.66	C3	30.91	C1	30.43	C2	33.87	C3	30.74	C1	30.48	C2	34.07	C3	30.78
spl.136	C1	30.88	C2	33.79	C3	30.51	C1	30.83	C2	34.2	C3	30.9	C1	30.98	C2	34.86	C3	30.96	C1	30.5	C2	34.18	C3	30.87	C1	30.55	C2	34.31	C3	30.83
spl.136	C1	31.24	C2	34.21	C3	30.66	C1	31.12	C2	34.53	C3	30.95	C1	31.12	C2	35.32	C3	30.93	C1	30.44	C2	34.66	C3	31	C1	30.61	C2	34.44	C3	31.05
spl.136	PR1	29.98	PR1	29.5	PR1	29.64	PR2	32.43	PR2	31.91	PR2	32.17	PR3	33.08	PR3	33.65	PR3	33.14	PC1	27.04	PC1	26.99	PC1	27.14	PC2	32.55	PC2	32.62	PC2	32.57
spl.136	PR1	30	PR1	29.57	PR1	29.49	PR2	32.54	PR2	31.94	PR2	32.08	PR3	33.45	PR3	33.82	PR3	33.13	PC1	27.14	PC1	27.12	PC1	27.16	PC2	32.65	PC2	32.66	PC2	32.65
spl.136	PR1	30.07	PR1	29.6	PR1	29.66	PR2	32.73	PR2	32.19	PR2	32.12	PR3	33.58	PR3	33.9	PR3	33.11	PC1	27.14	PC1	27.1	PC1	27.29	PC2	32.67	PC2	32.53	PC2	32.84
spl.137	C1	26.29	C2	30.79	C3	27.28	C1	26.24	C2	30.87	C3	27.6	C1	26.06	C2	31.42	C3	27.79	C1	26.04	C2	31.22	C3	27.85	C1	25.92	C2	31.13	C3	27.62
spl.137	C1	26.36	C2	30.93	C3	27.33	C1	26.39	C2	31.06	C3	27.55	C1	26.08	C2	31.52	C3	27.71	C1	26.09	C2	31.29	C3	27.84	C1	26.04	C2	31.26	C3	27.63
spl.137	C1	26.46	C2	30.79	C3	27.32	C1	26.46	C2	30.95	C3	27.62	C1	26.31	C2	31.41	C3	27.62	C1	26.1	C2	31.23	C3	27.86	C1	26.04	C2	31.36	C3	27.63
spl.137	PR1	26.33	PR1	25.93	PR1	26.04	PR2	28.38	PR2	27.98	PR2	27.9	PR3	29.72	PR3	30.06	PR3	29.47	PC1	28.09	PC1	28.4	PC1	28.38	PC2	32.51	PC2	32.49	PC2	32.15
spl.137	PR1	26.36	PR1	25.92	PR1	25.89	PR2	28.59	PR2	28.05	PR2	27.83	PR3	29.65	PR3	30	PR3	29.62	PC1	28.09	PC1	28.32	PC1	28.41	PC2	32.38	PC2	32.35	PC2	32.19
spl.137	PR1	26.38	PR1	25.88	PR1	25.93	PR2	28.57	PR2	27.97	PR2	27.9	PR3	29.76	PR3	29.98	PR3	29.49	PC1	28.15	PC1	28.39	PC1	28.45	PC2	32.39	PC2	32.44	PC2	32.44
spl.138	C1	27.12	C2	31.44	C3	28.26	C1	27.04	C2	31.54	C3	28.63	C1	26.92	C2	31.92	C3	28.63	C1	26.93	C2	31.52	C3	28.86	C1	26.74	C2	31.46	C3	28.78
spl.138	C1	27.05	C2	31.39	C3	28.11	C1	27.14	C2	31.62	C3	28.53	C1	27.01	C2	32.03	C3	28.69	C1	26.92	C2	31.54	C3	28.81	C1	26.82	C2	31.59	C3	28.78
spl.138	C1	27.14	C2	31.34	C3	28.1	C1	27.09	C2	31.5	C3	28.61	C1	26.95	C2	31.77	C3	28.5	C1	26.88	C2	31.83	C3	28.83	C1	26.83	C2	31.57	C3	28.79
spl.138	PR1	26.85	PR1	26.3	PR1	26.16	PR2	29.15	PR2	28.79	PR2	28.55	PR3	30.15	PR3	30.15	PR3	29.9	PC1	27.13	PC1	27.1	PC1	27.29	PC2	31.8	PC2	31.66	PC2	31.87
spl.138	PR1	26.65	PR1	26.19	PR1	26.07	PR2	29.2	PR2	28.72	PR2	28.51	PR3	30.1	PR3	30.38	PR3	29.86	PC1	27.13	PC1	27.06	PC1	27.08	PC2	31.83	PC2	31.7	PC2	31.61
spl.138	PR1	26.77	PR1	26.35	PR1	26.24	PR2	29.25	PR2	28.74	PR2	28.58	PR3	30.07	PR3	30.37	PR3	29.95	PC1	27.27	PC1	27.26	PC1	27.23	PC2	31.85	PC2	31.7	PC2	31.82
spl.139	C1	27.03	C2	31.29	C3	27.42	C1	26.83	C2	31.29	C3	27.82	C1	26.76	C2	31.92	C3	27.86	C1	26.7	C2	31.65	C3	27.95	C1	NA	C2	NA	C3	NA
spl.139	C1	27.03	C2	31.39	C3	27.33	C1	26.79	C2	31.35	C3	27.8	C1	26.77	C2	31.56	C3	27.71	C1	26.74	C2	31.8	C3	27.89	C1	NA	C2	NA	C3	NA
spl.139	C1	27.01	C2	31.32	C3	27.4	C1	26.82	C2	31.59	C3	27.7	C1	26.83	C2	31.47	C3	27.68	C1	26.81	C2	31.44	C3	27.92	C1	NA	C2	NA	C3	NA
spl.139	PR1	27.38	PR1	27.08	PR1	26.9	PR2	29.34	PR2	28.79	PR2	28.65	PR3	30.44	PR3	30.84	PR3	30.3	PC1	33.55	PC1	33.76	PC1	33.61	PC2	NA	PC2	NA	PC2	NA
spl.139	PR1	27.47	PR1	27	PR1	26.99	PR2	29.17	PR2	28.81	PR2	28.69	PR3	30.56	PR3	30.5	PR3	30.3	PC1	33.47	PC1	33.43	PC1	33.07	PC2	NA	PC2	NA	PC2	NA
spl.139	PR1	27.44	PR1	26.97	PR1	26.95	PR2	29.13	PR2	28.77	PR2	28.74	PR3	30.54	PR3	30.74	PR3	30.22	PC1	34.01	PC1	33.5	PC1	35.57	PC2	NA	PC2	NA	PC2	NA
spl.140	C1	28.27	C2	32.26	C3	29.16	C1	28.47	C2	32.09	C3	29.3	C1	28.23	C2	32.85	C3	29.6	C1	28.24	C2	32.08	C3	29.64	C1	28.29	C2	32.59	C3	29.63
spl.140	C1	28.49	C2	32.36	C3	29.08	C1	28.43	C2	32.25	C3	29.5	C1	28.42	C2	32.74	C3	29.59	C1	28.39	C2	32.42	C3	29.73	C1	28.23	C2	32.41	C3	29.72
spl.140	C1	28.59	C2	32.35	C3	29.13	C1	28.03	C2	32.36	C3	29.43	C1	28.29	C2	32.76	C3	29.48	C1	28.18	C2	32.33	C3	29.54	C1	28.34	C2	32.56	C3	29.51
spl.140	PR1	28.08	PR1	27.74	PR1	27.5	PR2	30.57	PR2	30.14	PR2	29.84	PR3	31.55	PR3	31.9	PR3	31.63	PC1	29.29	PC1	29.26	PC1	29.4	PC2	34.49	PC2	34.22	PC2	34.25
spl.140	PR1	28.06	PR1	27.69	PR1	27.57	PR2	30.76	PR2	30.16	PR2	30.11	PR3	31.91	PR3	32	PR3	31.5	PC1	29.48	PC1	29.38	PC1	29.46	PC2	35.11	PC2	34.04	PC2	34.57
spl.140	PR1	28.1	PR1	27.6	PR1	27.59	PR2	29.87	PR2	30.27	PR2	29.94	PR3	31.76	PR3	31.85	PR3	31.36	PC1	29.36	PC1	29.41	PC1	29.49	PC2	34.37	PC2	34.51	PC2	33.79
spl.141	C1	28.26	C2	32.25	C3	28.14	C1	28.2	C2	32.23	C3	28.56	C1	28.04	C2	32.53	C3	28.5	C1	28.05	C2	32.29	C3	28.59	C1	28.05	C2	32.31	C3	28.56
spl.141	C1	28.28	C2	32.22	C3	28.24	C1	28.38	C2	32.52	C3	28.54	C1	28.19	C2	32.59	C3	28.62	C1	28.06	C2	32.42	C3	28.59	C1	28.15	C2	32.48	C3	28.67
spl.141	C1	28.5	C2	32.48	C3	28.23	C1	28.44	C2	32.4	C3	28.59	C1	28.3	C2	32.76	C3	28.62	C1	28.2	C2	32.52	C3	28.51	C1	28.24	C2	32.62	C3	28.65
spl.141	PR1	28.34	PR1	28	PR1	27.77	PR2	30.55	PR2	30.21	PR2	30.04	PR3	31.12	PR3	31.52	PR3	30.8	PC1	27.84	PC1	28.13	PC1	27.95	PC2	32.54	PC2	32.51	PC2	32.55
spl.141	PR1	28.31	PR1	27.89	PR1	27.9	PR2	30.56	PR2	30.22	PR2	29.86	PR3	31.2	PR3	31.32	PR3	30.9	PC1	28.02	PC1	28	PC1	28.02	PC2	32.89	PC2	32.35	PC2	32.54
spl.141	PR1	28.44	PR1	27.93	PR1	27.87	PR2	30.65	PR2	30.27	PR2	30.22	PR3	31.34	PR3	31.42	PR3	31.06	PC1	28.16	PC1	27.96	PC1	27.99	PC2	32.65	PC2	32.65	PC2	32.54
spl.142	C1	28.3	C2	31.88	C3	28.87	C1	28.13	C2	32.26	C3	29.31	C1	28.3	C2	32.87	C3	29.38	C1	28.29	C2	32.42	C3	29.46	C1	28.13	C2	32.69	C3	29.53
spl.142	C1	28.38	C2	31.93	C3	28.9	C1	28.31	C2	32.22	C3	29.26	C1	28.16	C2	32.69	C3	29.27	C1	28.15	C2	32.28	C3	29.48	C1	28.35	C2	32.28	C3	29.44
spl.142	C1	28.46	C2	32.09	C3	29.08	C1	28.51	C2	32.18	C3	29.52	C1	28.2	C2	32.67	C3	29.39	C1	28.16	C2	32.3	C3	29.6	C1	28.14	C2	32.45	C3	29.55
spl.142	PR1	27.75	PR1	27.38	PR1	27.38	PR2	30.24	PR2	30	PR2	29.91	PR3	31.39	PR3	31.67	PR3	31.23	PC1	30.33	PC1	30.82	PC1	30.75	PC2	35.59	PC2	35.5	PC2	35.16
spl.142	PR1	27.84	PR1	27.46	PR1	27.32	PR2	30.49	PR2	30.02	PR2	29.96	PR3	31.16	PR3	31.75	PR3	30.92	PC1	30.31	PC1	30.75	PC1	30.65	PC2	35.88	PC2	34.93	PC2	34.99
spl.142	PR1	27.97	PR1	27.42	PR1	27.44	PR2	30.7	PR2	30.08	PR2	29.92	PR3	31.27	PR3	31.66	PR3	31.15	PC1	30.41	PC1	30.52	PC1	30.61	PC2	35.1	PC2	35.05	PC2	35.03
spl.143	C1	27.3	C2	31.47	C3	28.05	C1	27.09	C2	31.4	C3	28.46	C1	27.04	C2	31.78	C3	28.4	C1	26.83	C2	31.46	C3	28.14	C1	26.56	C2	31.33	C3	28.25
spl.143	C1	27.43	C2	31.49	C3	28.22	C1	27.24	C2	31.39	C3	28.56	C1	27.24	C2	32	C3	28.58	C1	26.49	C2	31.42	C3	28.41	C1	26.97	C2	31.61	C3	28.45
spl.143	C1	27.24	C2	31.62	C3	28.15	C1	26.98	C2	31.61	C3	28.57	C1	27.17	C2	31.71	C3	28.42	C1	26.88	C2	31.34	C3	28.61	C1	27.14	C2	31.49	C3	28.63
spl.143	PR1	27.69	PR1	27.1	PR1	27.32	PR2	29.99	PR2	29.51	PR2	29.47	PR3	30.92	PR3	31.01	PR3	30.79	PC1	25.19	PC1	25.12	PC1	25.05	PC2	29.22	PC2	29.64	PC2	29.52
spl.143	PR1	27.98	PR1	27.42	PR1	27.38	PR2	30.01	PR2	29.41	PR2	29.38	PR3	30.97	PR3	30.96	PR3	30.81	PC1	24.81	PC1	25.11	PC1	25.19	PC2	29.78	PC2	29.68	PC2	29.71
spl.143	PR1	27.79	PR1	27.3	PR1	27.32	PR2	29.78	PR2	29.5	PR2	29.49	PR3	30.97	PR3	30.94	PR3	30.74	PC1	25.25	PC1	25.23	PC1	25.37	PC2	29.74	PC2	29.74	PC2	29.67
