# Supplementary material for: Dysregulation of the PRUNE2/PCA3 genetic axis in human prostate cancer: from experimental discovery to validation in two independent patient cohorts
Source: eLife journal article supplement (doi:10.7554/elife.81929), 2023-01-16
Supplement: supp [file elife-81929-supp-v1.zip › elife_poa_e81929_Figure_1_source_data_3.txt]

spl	PC			PR			AGE	ALIVE_YesNo	RECUR_YesNo	YearsDiff		Gleason.Grade	Path.Stage	Ratio			class.PR	class.PC	class.Ratio	PR_grp	PC_grp	status
spl.1	4.91			-0.163333333333333	75	A		N		14.7488021902806		4+3		pT3a		-0.0332654446707399	2	2	2		High	High	0
spl.10	2.38166666666667		-0.456666666666667	74	A		Y		2.24229979466119		3+4		pT3a		-0.191742477256823	2	1	2		High	Low	1
spl.101	5.95333333333333		-0.900000000000001	57	U		N		2.03422313483915		3+4		pT2		-0.151175811870101	2	2	2		High	High	0
spl.102	2.18833333333333		0.259999999999999	59	A		N		4			3+4		pT2		0.118811881188118	2	1	2		High	Low	0
spl.103	3.12666666666667		-1.07333333333333	65	A		Y		3.7864476386037		3+4		pT2		-0.343283582089552	2	2	2		High	High	1
spl.104	3.42333333333333		-1.59666666666667	58	A		N		3.73169062286105		4+3		pT2		-0.466407010710808	1	2	1		Low	High	0
spl.105	2.405			1.27666666666667		47	U		LTF		0.0903490759753593	4+3		pT3a		0.530838530838531	2	1	2		High	Low	0
spl.106	2.18			-2.16666666666667	63	A		N		0.520191649555099	4+3		pT2		-0.99388379204893	1	1	1		Low	Low	0
spl.107	3.48166666666667		-1.53666666666667	64	A		N		2.92128678986995		3+4		pT2		-0.441359502154141	2	2	1		High	High	0
spl.108	5.13166666666667		-1.70333333333334	56	A		Y		3.48254620123203		3+4		pT3a		-0.331925949983762	1	2	1		Low	High	1
spl.109	2.39333333333333		0.466666666666667	67	A		N		3.46338124572211		3+4		pT3a		0.194986072423399	2	1	2		High	Low	0
spl.11	3.06666666666667		-0.723333333333334	71	U		N		3.58658453114305		3+4		pT2		-0.235869565217392	2	2	2		High	High	0
spl.110	4.64666666666667		-1.00333333333333	64	A		N		3.09924709103354		3+4		pT2		-0.215925394548063	2	2	2		High	High	0
spl.111	4.15			-0.396666666666666	59	A		N		1.90280629705681		3+4		pT3a		-0.0955823293172689	2	2	2		High	High	0
spl.112	-0.336666666666667	-2.08333333333333	65	A		N		3.08008213552361		4+3		pT2		6.18811881188119		1	1	1		Low	Low	0
spl.114	3.64333333333333		-2.59			63	A		N		3.46338124572211		3+4		pT2		-0.710887465690759	1	2	1		Low	High	0
spl.115	3.23166666666667		-2.06333333333333	50	A		N		0.555783709787817	3+4		pT3a		-0.638473439917483	1	2	1		Low	High	0
spl.116b	4.17666666666667		-0.38			57	A		N		1.93839835728953		3+4		pT2		-0.0909816440542698	2	2	2		High	High	0
spl.117	3.45833333333333		-1.25666666666667	53	A		N		3.11841204654346		3+4		pT3a		-0.363373493975904	2	2	1		High	High	0
spl.118	1.315			0.356666666666666	48	A		N		2.88843258042437		3+4		pT2		0.271229404309252	2	1	2		High	Low	0
spl.119	5.72333333333333		-2.11			63	A		N		2.6009582477755		3+4		pT3a		-0.368666278392545	1	2	1		Low	High	0
spl.12	-3.18833333333333	-0.860000000000001	52	A		N		6.507871321013		3+4		pT3a		0.269733403031887	2	1	2		High	Low	0
spl.13	4.695			-1.28			53	U		N		0.933607118412047	3+4		pT2		-0.272630457933972	2	2	1		High	High	0
spl.14	-0.251666666666665	-0.700000000000002	51	A		N		3.07460643394935		3+4		pT2		2.78145695364241		2	1	2		High	Low	0
spl.15	3.08333333333333		-1.85333333333333	56	A		N		3.37029431895962		3+4		pT2		-0.601081081081081	1	2	1		Low	High	0
spl.16	3.135			-0.866666666666666	71	U		LTF		0.224503764544832	3+4		pT3a		-0.276448697501329	2	2	2		High	High	0
spl.17	4.17333333333333		-1.25			79	A		N		13.0020533880903		3+4		pT2		-0.299520766773163	2	2	1		High	High	0
spl.18	2.07666666666667		-1.07666666666667	76	U		LTF		13.7494866529774		3+4		pT2		-0.518459069020868	2	1	2		High	Low	0
spl.19	4.375			-0.953333333333332	74	A		Y		3.20602327173169		3+4		pT3a		-0.217904761904762	2	2	2		High	High	1
spl.2	4.49666666666667		-2.09333333333333	76	A		Y		0.0848733744010951	3+4		pT2		-0.465530022238695	1	2	1		Low	High	1
spl.20	0.723333333333333	-1.51			68	U		N		3.00068446269678		3+4		pT3a		-2.08755760368664	2	1	1		High	Low	0
spl.22	2.58166666666667		-1.56666666666667	71	A		N		4.6570841889117		3+4		pT3a		-0.606843124596514	1	2	1		Low	High	0
spl.23	1.52833333333333		-1.34666666666667	84	U		N		2.33264887063655		3+4		pT2		-0.88113413304253	2	1	1		High	Low	0
spl.24	3.44			-1.45			78	A		N		6.72142368240931		3+4		pT2		-0.421511627906976	2	2	1		High	High	0
spl.25	3.12666666666667		-2.54666666666667	77	A		N		8			3+4		pT2		-0.814498933901919	1	2	1		Low	High	0
spl.26	3.35			-1.87			60	A		N		6.75427789185489		3+4		pT2		-0.558208955223881	1	2	1		Low	High	0
spl.28	2.59833333333333		-1.45666666666667	64	A		N		6.85557837097878		3+4		pT3a		-0.560615779345734	2	2	1		High	High	0
spl.3	3.50833333333333		-0.869999999999999	65	A		N		8.76112251882272		4+3		pT2		-0.247980997624703	2	2	2		High	High	0
spl.30	4.885			-1.91666666666667	62	A		N		6.50239561943874		3+4		pT2		-0.392357557147731	1	2	1		Low	High	0
spl.31	4.47333333333333		-0.986666666666667	58	A		Y		3.58932238193018		3+4		pT2		-0.220566318926975	2	2	2		High	High	1
spl.32	4.37833333333333		-0.986666666666667	67	A		N		6.25051334702259		3+4		pT2		-0.225352112676056	2	2	2		High	High	0
spl.33b	0.0350000000000001	-1.00666666666667	69	A		N		4.09582477754962		3+4		pT2		-28.7619047619047	2	1	2		High	Low	0
spl.34d	0.313333333333334	-3.35666666666667	62	A		Y		3.43052703627652		3+4		pT2		-10.7127659574468	1	1	1		Low	Low	1
spl.35	-0.868333333333334	-4.02			63	A		N		9.00752908966461		4+3		pT2		4.62955854126679		1	1	1		Low	Low	0
spl.36b	1.68			-2.08333333333333	63	A		N		1.70294318959617		3+4		pT3a		-1.24007936507937	1	1	1		Low	Low	0
spl.37	0.933333333333332	-1.37			66	A		N		3.1211498973306		3+4		pT2		-1.46785714285714	2	1	1		High	Low	0
spl.38	2.83833333333333		-2.73666666666667	63	A		N		9.56331279945243		3+4		pT2		-0.964180857310629	1	2	1		Low	High	0
spl.39	3.2			-1.33333333333333	54	A		Y		2.4558521560575		3+4		pT2		-0.416666666666667	2	2	1		High	High	1
spl.4	4.49166666666667		-0.416666666666665	69	A		N		5.91649555099247		3+4		pT2		-0.0927643784786639	2	2	2		High	High	0
spl.40	3.21166666666667		-3.08			76	A		N		3.38672142368241		3+4		pT2		-0.959003632589517	1	2	1		Low	High	0
spl.41	1.3			-3.13			57	A		N		7.09103353867214		3+4		pT2		-2.40769230769231	1	1	1		Low	Low	0
spl.42	3.225			-2.07333333333333	71	A		Y		0.665297741273101	3+4		pT2		-0.642894056847545	1	2	1		Low	High	1
spl.43	1.065			-1.57			45	A		N		2.12183436002738		3+4		pT3a		-1.47417840375587	1	1	1		Low	Low	0
spl.44	3.77833333333333		-2.38333333333333	58	A		N		6.85831622176591		3+4		pT2		-0.630789589766211	1	2	1		Low	High	0
spl.46	-0.368333333333334	-2.46			67	A		LTF		0.457221081451061	4+3		pT2		6.67873303167419		1	1	1		Low	Low	0
spl.47	2.05666666666667		-2.31666666666667	54	A		N		6.35728952772074		3+4		pT3a		-1.12641815235008	1	1	1		Low	Low	0
spl.48	1.95333333333333		-1.72666666666667	62	A		N		6.52977412731006		3+4		pT2		-0.8839590443686		1	1	1		Low	Low	0
spl.49	0.493333333333333	-0.403333333333334	50	A		N		3.6933607118412		3+4		pT2		-0.817567567567569	2	1	2		High	Low	0
spl.5	1.60666666666667		-0.436666666666666	66	A		N		4.99931553730322		3+4		pT2		-0.271784232365145	2	1	2		High	Low	0
spl.50	1.74166666666667		-1.7			61	U		N		3.44695414099932		3+4		pT3a		-0.976076555023924	1	1	1		Low	Low	0
spl.51	0.296666666666668	-2.41333333333333	62	A		Y		1.29774127310062		4+3		pT2		-8.13483146067412	1	1	1		Low	Low	1
spl.53	1.04			-1.79			55	A		N		2.84736481861739		3+4		pT2		-1.72115384615385	1	1	1		Low	Low	0
spl.55	2.89166666666667		-1.68666666666667	66	A		N		6.37645448323066		3+4		pT3a		-0.58328530259366	1	2	1		Low	High	0
spl.57	2.73166666666667		-1.46			73	A		Y		1.37713894592745		3+4		pT2		-0.534472239170226	2	2	1		High	High	1
spl.58	0.108333333333333	-1.51666666666667	72	A		N		5.92470910335387		3+4		pT2		-14.0000000000001	2	1	1		High	Low	0
spl.59	2.605			-1.72			54	A		N		2.94592744695414		3+4		pT2		-0.660268714011516	1	2	1		Low	High	0
spl.6	0.809999999999999	-1.60333333333333	74	A		N		1.41273100616016		3+4		pT2		-1.97942386831276	1	1	1		Low	Low	0
spl.60	-1.31666666666667	-0.933333333333335	60	A		N		5.55509924709103		3+4		pT2		0.708860759493672	2	1	2		High	Low	0
spl.61	3.105			-1.59			59	A		N		3.81108829568789		3+4		pT2		-0.51207729468599	1	2	1		Low	High	0
spl.62	2.44333333333333		-2.12			60	A		N		4.09856262833676		3+4		pT2		-0.867667121418826	1	1	1		Low	Low	0
spl.63	2.16			-1.04333333333333	48	A		N		4.72826830937714		3+4		pT2		-0.483024691358025	2	1	2		High	Low	0
spl.64	3.985			-0.473333333333333	55	A		Y		3.00342231348392		3+4		pT2		-0.118778753659557	2	2	2		High	High	1
spl.65	2.77666666666667		-1.88333333333333	66	A		N		4.82956878850103		3+4		pT2		-0.678271308523409	1	2	1		Low	High	0
spl.66	3.77			-1.39666666666667	77	A		Y		1.31690622861054		4+3		pT3a		-0.370468611847922	2	2	1		High	High	1
spl.67	1.34			-0.723333333333333	70	A		Y		4.82409308692676		4+3		pT3a		-0.539800995024875	2	1	2		High	Low	1
spl.68	3.475			-1.27666666666667	53	A		Y		4.24093086926762		3+4		pT2		-0.367386091127098	2	2	1		High	High	1
spl.69	-0.178333333333333	-2.35333333333333	56	A		N		5.60711841204654		3+4		pT2		13.196261682243		1	1	1		Low	Low	0
spl.7	3.17			-1.8			71	A		N		0.49555099247091		3+4		pT2		-0.56782334384858	1	2	1		Low	High	0
spl.70	0.778333333333334	-1.36			66	A		N		1.86995208761123		3+4		pT2		-1.74732334047109	2	1	1		High	Low	0
spl.71	3.1			-2.71666666666667	64	A		N		2.56262833675565		3+4		pT2		-0.876344086021505	1	2	1		Low	High	0
spl.72	1.85666666666667		-1.97666666666667	61	A		N		2.93223819301848		3+4		pT2		-1.06463195691203	1	1	1		Low	Low	0
spl.73	5.185			-1.86666666666667	58	A		N		3.88501026694045		3+4		pT2		-0.360012857602057	1	2	1		Low	High	0
spl.74	0.586666666666667	-1.54333333333333	54	A		Y		2.20670773442847		3+4		pT2		-2.63068181818182	2	1	1		High	Low	1
spl.75	0.0533333333333335	-1.62333333333333	55	A		N		4.67624914442163		3+4		pT2		-30.4375			1	1	1		Low	Low	0
spl.76	1.04333333333333		-3.40666666666667	59	A		N		4			3+4		pT2		-3.26517571884984	1	1	1		Low	Low	0
spl.77	3.14			-1.05			60	A		Y		0.999315537303217	4+3		pT3a		-0.334394904458599	2	2	2		High	High	1
spl.78	3.475			-1.44333333333333	51	A		N		4.70910335386721		3+4		pT2		-0.415347721822541	2	2	1		High	High	0
spl.79	3.005			-2.24333333333333	56	A		N		3.95345653661875		3+4		pT2		-0.746533555185802	1	2	1		Low	High	0
spl.8	3.37833333333333		-0.896666666666666	62	A		N		5.14168377823409		3+4		pT3a		-0.265416872224963	2	2	2		High	High	0
spl.80	2.38166666666667		-1.59			46	A		N		2.58179329226557		3+4		pT2		-0.667599720083975	1	1	1		Low	Low	0
spl.81	3.01833333333333		-2.49333333333333	68	A		N		2.29979466119096		3+4		pT2		-0.826062948647156	1	2	1		Low	High	0
spl.82	2.48833333333333		-1.93			63	A		N		4.73648186173854		3+4		pT2		-0.77561955793704	1	2	1		Low	High	0
spl.83	2.96333333333333		-1.67			56	A		N		2.10266940451745		3+4		pT2		-0.563554555680539	1	2	1		Low	High	0
spl.84	3.18			-2.03			56	A		N		1.85352498288843		3+4		pT2		-0.638364779874214	1	2	1		Low	High	0
spl.85	2.07333333333333		-1.57			52	A		N		1.03764544832307		3+4		pT2		-0.757234726688104	1	1	1		Low	Low	0
spl.86	-2.80333333333333	-1.57333333333333	57	U		LTF		0.183436002737851	3+4		pT2		0.561236623067777	1	1	1		Low	Low	0
spl.87	1.03833333333333		-3.77333333333333	60	A		Y		4.17248459958932		4+3		pT2		-3.63402889245586	1	1	1		Low	Low	1
spl.88	2.25666666666667		-1.86666666666667	59	A		N		4.09308692676249		4+3		pT2		-0.827178729689808	1	1	1		Low	Low	0
spl.89	3.08333333333333		-1.92333333333333	65	A		N		2.00684462696783		3+4		pT2		-0.623783783783783	1	2	1		Low	High	0
spl.9	1.63166666666667		-0.573333333333333	71	A		N		11.460643394935		3+4		pT2		-0.351378958120531	2	1	2		High	Low	0
spl.90	3.35833333333333		-1.74666666666667	67	A		N		4.24914442162902		3+4		pT3a		-0.520099255583127	1	2	1		Low	High	0
spl.91	2.51333333333333		-1.54333333333333	70	A		N		4.57768651608487		3+4		pT3a		-0.614058355437666	2	2	1		High	High	0
spl.92	1.29666666666667		-1.88666666666667	77	A		N		10.2505133470226		3+4		pT2		-1.45501285347044	1	1	1		Low	Low	0
spl.93	0.586666666666667	-1.08333333333333	73	A		N		12.7529089664613		3+4		pT2		-1.84659090909091	2	1	2		High	Low	0
spl.94	1.29333333333333		-2.71333333333333	78	A		N		13.7494866529774		3+4		pT2		-2.0979381443299		1	1	1		Low	Low	0
spl.97	5.54166666666667		-2.25666666666667	55	A		Y		9.20191649555099		3+4		pT3a		-0.407218045112782	1	2	1		Low	High	1
spl.99	5.56333333333333		-0.823333333333333	70	A		N		5.34154688569473		3+4		pT2		-0.147992810065908	2	2	2		High	High	0
