# Supplementary material for: Dysregulation of the PRUNE2/PCA3 genetic axis in human prostate cancer: from experimental discovery to validation in two independent patient cohorts
Source: eLife journal article supplement (doi:10.7554/elife.81929), 2023-01-16
Supplement: supp [file elife-81929-supp-v1.zip › elife_poa_e81929_Table_1_source_data_1.csv]

Sample.ID.107	Sample.ID.24	AGE	ALIVE_YesNo	RECUR_YesNo	YearsDiff	Gleason.Grade	Path.Stage
spl.16		71	U	LTF	0.224503764544832	3+4	pT3a
spl.1		75	A	N	14.7488021902806	4+3	pT3a
spl.97		55	A	Y	9.20191649555099	3+4	pT3a
spl.92		77	A	N	10.2505133470226	3+4	pT2
spl.93		73	A	N	12.7529089664613	3+4	pT2
spl.17		79	A	N	13.0020533880903	3+4	pT2
spl.18		76	U	LTF	13.7494866529774	3+4	pT2
spl.94		78	A	N	13.7494866529774	3+4	pT2
spl.8		62	A	N	5.14168377823409	3+4	pT3a
spl.2		76	A	Y	0.0848733744010951	3+4	pT2
spl.3		65	A	N	8.76112251882272	4+3	pT2
spl.7		71	A	N	0.49555099247091	3+4	pT2
spl.24		78	A	N	6.72142368240931	3+4	pT2
spl.20		68	U	N	3.00068446269678	3+4	pT3a
spl.22		71	A	N	4.6570841889117	3+4	pT3a
spl.19		74	A	Y	3.20602327173169	3+4	pT3a
spl.23		84	U	N	2.33264887063655	3+4	pT2
spl.25		77	A	N	8	3+4	pT2
spl.13		53	U	N	0.933607118412047	3+4	pT2
spl.9		71	A	N	11.460643394935	3+4	pT2
spl.10		74	A	Y	2.24229979466119	3+4	pT3a
spl.11		71	U	N	3.58658453114305	3+4	pT2
spl.12		52	A	N	6.507871321013	3+4	pT3a
spl.37		66	A	N	3.1211498973306	3+4	pT2
spl.38		63	A	N	9.56331279945243	3+4	pT2
spl.15		56	A	N	3.37029431895962	3+4	pT2
spl.33b		69	A	N	4.09582477754962	3+4	pT2
spl.14		51	A	N	3.07460643394935	3+4	pT2
spl.34d		62	A	Y	3.43052703627652	3+4	pT2
spl.35		63	A	N	9.00752908966461	4+3	pT2
spl.36b		63	A	N	1.70294318959617	3+4	pT3a
spl.39		54	A	Y	2.4558521560575	3+4	pT2
spl.41		57	A	N	7.09103353867214	3+4	pT2
spl.42		71	A	Y	0.665297741273101	3+4	pT2
spl.40		76	A	N	3.38672142368241	3+4	pT2
spl.5		66	A	N	4.99931553730322	3+4	pT2
spl.6		74	A	N	1.41273100616016	3+4	pT2
spl.44		58	A	N	6.85831622176591	3+4	pT2
spl.46	spl.133	67	A	LTF	0.457221081451061	4+3	pT2
spl.47	spl.142	54	A	N	6.35728952772074	3+4	pT3a
spl.48	spl.135	62	A	N	6.52977412731006	3+4	pT2
spl.49	spl.134	50	A	N	3.6933607118412	3+4	pT2
spl.26		60	A	N	6.75427789185489	3+4	pT2
spl.28		64	A	N	6.85557837097878	3+4	pT3a
spl.30		62	A	N	6.50239561943874	3+4	pT2
spl.31		58	A	Y	3.58932238193018	3+4	pT2
spl.32		67	A	N	6.25051334702259	3+4	pT2
spl.4		69	A	N	5.91649555099247	3+4	pT2
spl.43		45	A	N	2.12183436002738	3+4	pT3a
spl.65		66	A	N	4.82956878850103	3+4	pT2
spl.99		70	A	N	5.34154688569473	3+4	pT2
spl.66		77	A	Y	1.31690622861054	4+3	pT3a
spl.67		70	A	Y	4.82409308692676	4+3	pT3a
spl.51		62	A	Y	1.29774127310062	4+3	pT2
spl.50		61	U	N	3.44695414099932	3+4	pT3a
spl.53		55	A	N	2.84736481861739	3+4	pT2
spl.58		72	A	N	5.92470910335387	3+4	pT2
spl.55	spl.143	66	A	N	6.37645448323066	3+4	pT3a
spl.57	spl.136	73	A	Y	1.37713894592745	3+4	pT2
spl.59	spl.124	54	A	N	2.94592744695414	3+4	pT2
spl.60		60	A	N	5.55509924709103	3+4	pT2
spl.61	spl.132	59	A	N	3.81108829568789	3+4	pT2
spl.62		60	A	N	4.09856262833676	3+4	pT2
spl.63	spl.138	48	A	N	4.72826830937714	3+4	pT2
spl.64	spl.137	55	A	Y	3.00342231348392	3+4	pT2
spl.81		68	A	N	2.29979466119096	3+4	pT2
spl.82		63	A	N	4.73648186173854	3+4	pT2
spl.83		56	A	N	2.10266940451745	3+4	pT2
spl.84		56	A	N	1.85352498288843	3+4	pT2
spl.101		57	U	N	2.03422313483915	3+4	pT2
spl.85		52	A	N	1.03764544832307	3+4	pT2
spl.86		57	U	LTF	0.183436002737851	3+4	pT2
spl.87		60	A	Y	4.17248459958932	4+3	pT2
spl.70		66	A	N	1.86995208761123	3+4	pT2
spl.88		59	A	N	4.09308692676249	4+3	pT2
spl.89		65	A	N	2.00684462696783	3+4	pT2
spl.90		67	A	N	4.24914442162902	3+4	pT3a
spl.71	spl.141	64	A	N	2.56262833675565	3+4	pT2
spl.69		56	A	N	5.60711841204654	3+4	pT2
spl.72	spl.127	61	A	N	2.93223819301848	3+4	pT2
spl.73	spl.128	58	A	N	3.88501026694045	3+4	pT2
spl.74	spl.123	54	A	Y	2.20670773442847	3+4	pT2
spl.75	spl.126	55	A	N	4.67624914442163	3+4	pT2
spl.68	spl.129	53	A	Y	4.24093086926762	3+4	pT2
spl.76		59	A	N	4	3+4	pT2
spl.77		60	A	Y	0.999315537303217	4+3	pT3a
spl.78	spl.125	51	A	N	4.70910335386721	3+4	pT2
spl.79		56	A	N	3.95345653661875	3+4	pT2
spl.80	spl.122	46	A	N	2.58179329226557	3+4	pT2
spl.105	spl.131	47	U	LTF	0.0903490759753593	4+3	pT3a
spl.106	spl.130	63	A	N	0.520191649555099	4+3	pT2
spl.107		64	A	N	2.92128678986995	3+4	pT2
spl.108		56	A	Y	3.48254620123203	3+4	pT3a
spl.109	spl.140	67	A	N	3.46338124572211	3+4	pT3a
spl.110		64	A	N	3.09924709103354	3+4	pT2
spl.111		59	A	N	1.90280629705681	3+4	pT3a
spl.91		70	A	N	4.57768651608487	3+4	pT3a
spl.102		59	A	N	4	3+4	pT2
spl.103		65	A	Y	3.7864476386037	3+4	pT2
spl.104	spl.139	58	A	N	3.73169062286105	4+3	pT2
spl.112		65	A	N	3.08008213552361	4+3	pT2
spl.114	spl.121	63	A	N	3.46338124572211	3+4	pT2
spl.115	spl.120	50	A	N	0.555783709787817	3+4	pT3a
spl.116b		57	A	N	1.93839835728953	3+4	pT2
spl.117		53	A	N	3.11841204654346	3+4	pT3a
spl.118		48	A	N	2.88843258042437	3+4	pT2
spl.119		63	A	N	2.6009582477755	3+4	pT3a
